# Supplementary material for: How Tupanvirus Degrades the Ribosomal RNA of Its Amoebal Host? The Ribonuclease T2 Track
Source: Front Microbiol. 2020 Jul 28;11:1691. doi: 10.3389/fmicb.2020.01691 (PMC7399046; doi:10.3389/fmicb.2020.01691)
Supplement: Supplementary file 3 [file Table_2.XLSX]

## Sheet: Feuil1
	Tested hypothesis (M0O1)								Null hypothesis (M0)
Comparison	lnL	t	S	N	dN/dS	dN	dS		lnL	t	S	N	dN/dS	dN	dS		lnLM0-LnlM0O1	df	probability
TPV-DO_00001_VS_TPV-SL_00001	-2127.424324	0.8603	213.9	974.1	0.0603	0.0753	1.2496		-2261.795236	0.5993	213.8	974.2	1.0000	0.1998	0.1998		268.741824	1	0.000e+00
TPV-DO_00002_VS_TPV-SL_00002	-979.933521	0.8125	100.4	553.6	0.0165	0.0267	1.6164		-1074.154475	0.4178	114.4	539.6	1.0000	0.1393	0.1393		188.441908	1	0.000e+00
TPV-DO_00003_VS_TPV-SL_00003	-1207.904469	1.2219	102.6	524.4	0.0709	0.1295	1.8271		-1274.443279	0.8265	102.3	524.7	1.0000	0.2755	0.2755		133.07762	1	0.000e+00
TPV-DO_00004_VS_TPV-SL_00004	-857.981082	2.3835	114.1	365.9	0.0568	0.1605	2.8268		-890.559588	1.0688	120.1	359.9	1.0000	0.3563	0.3563		65.157012	1	6.661e-16
TPV-DO_00005_VS_TPV-SL_00005	-1950.008495	1.5194	225.3	911.7	0.0433	0.0942	2.1748		-2063.152479	0.6842	241.3	895.7	1.0000	0.2281	0.2281		226.287968	1	0.000e+00
TPV-DO_00006_VS_TPV-SL_00006	-1597.802009	1.2866	137.8	741.2	0.0697	0.1387	1.9893		-1659.799261	0.7293	144.0	735.0	1.0000	0.2431	0.2431		123.994504	1	0.000e+00
TPV-DO_00007_VS_TPV-SL_00007	-718.950314	1.1503	71.8	351.2	0.0562	0.0995	1.7713		-756.014503	0.6120	72.0	351.0	1.0000	0.2040	0.2040		74.128378	1	0.000e+00
TPV-DO_00008_VS_TPV-SL_00008	-4329.555801	8.5324	357.0	1914.0	0.0082	0.1414	17.3359		-4654.427242	0.9528	361.0	1910.0	1.0000	0.3176	0.3176		649.742882	1	0.000e+00
TPV-DO_00009_VS_TPV-SL_00009	-822.431069	0.9083	80.1	396.9	0.0418	0.0624	1.4941		-883.819237	0.5341	81.0	396.0	1.0000	0.1780	0.1780		122.776336	1	0.000e+00
TPV-DO_00010_VS_TPV-SL_00010	-2341.282302	0.9580	199.7	1147.3	0.0397	0.0696	1.7543		-2518.766340	0.5920	200.6	1146.4	1.0000	0.1973	0.1973		354.968076	1	0.000e+00
TPV-DO_00011_VS_TPV-SL_00012	-2732.760720	0.9548	271.2	1342.8	0.0364	0.0583	1.6051		-2937.122555	0.5296	278.3	1335.7	1.0000	0.1765	0.1765		408.72367	1	0.000e+00
TPV-DO_00012_VS_TPV-SL_00013	-312.194254	0.7999	39.4	164.6	0.0151	0.0196	1.2979		-338.280136	0.3952	39.3	164.7	1.0000	0.1317	0.1317		52.171764	1	5.085e-13
TPV-DO_00013_VS_TPV-SL_00014	-940.317116	1.0662	101.6	417.4	0.0683	0.0968	1.4173		-991.043154	0.6727	101.1	417.9	1.0000	0.2242	0.2242		101.452076	1	0.000e+00
TPV-DO_00014_VS_TPV-SL_00015	-1096.400042	1.0368	113.6	459.4	0.1301	0.1486	1.1421		-1133.574997	0.7918	113.5	459.5	1.0000	0.2639	0.2639		74.34991	1	0.000e+00
TPV-DO_00015_VS_TPV-SL_00016	-2455.324303	1.0534	281.7	1161.3	0.0603	0.0868	1.4407		-2586.866895	0.6216	298.2	1144.8	1.0000	0.2072	0.2072		263.085184	1	0.000e+00
TPV-DO_00016_VS_TPV-SL_00017	-1203.668451	1.4375	129.3	596.7	0.0216	0.0527	2.4464		-1305.423997	0.5055	127.0	599.0	1.0000	0.1685	0.1685		203.511092	1	0.000e+00
TPV-DO_00017_VS_TPV-SL_00018	-897.099017	1.7930	89.7	384.3	0.0840	0.1951	2.3225		-930.923251	1.0678	94.8	379.2	1.0000	0.3559	0.3559		67.648468	1	2.220e-16
TPV-DO_00018_VS_TPV-SL_00019	-772.008700	8.5389	67.7	349.3	0.0079	0.1326	16.8461		-827.155792	0.9026	74.1	342.9	1.0000	0.3009	0.3009		110.294184	1	0.000e+00
TPV-DO_00019_VS_TPV-SL_00020	-2298.775787	1.6432	192.1	1031.9	0.0523	0.1425	2.7243		-2436.252675	0.8993	205.9	1018.1	1.0000	0.2998	0.2998		274.953776	1	0.000e+00
TPV-DO_00020_VS_TPV-SL_00022	-1192.571544	1.0373	122.4	549.6	0.0572	0.0864	1.5107		-1260.372437	0.6314	131.4	540.6	1.0000	0.2105	0.2105		135.601786	1	0.000e+00
TPV-DO_00021_VS_TPV-SL_00023	-1709.918161	1.0211	181.2	775.8	0.0570	0.0824	1.4451		-1812.642342	0.6156	183.9	773.1	1.0000	0.2052	0.2052		205.448362	1	0.000e+00
TPV-DO_00022_VS_TPV-SL_00024	-760.441560	1.5237	69.0	327.0	0.1123	0.2136	1.9020		-780.579604	1.0239	70.1	325.9	1.0000	0.3413	0.3413		40.276088	1	2.205e-10
TPV-DO_00023_VS_TPV-SL_00025	-856.542309	1.4822	86.7	435.3	0.0242	0.0641	2.6536		-925.195455	0.5207	83.6	438.4	1.0000	0.1736	0.1736		137.306292	1	0.000e+00
TPV-DO_00024_VS_TPV-SL_00026	-1021.452009	0.8140	112.0	485.0	0.0467	0.0562	1.2030		-1082.608650	0.4889	122.0	475.0	1.0000	0.1630	0.1630		122.313282	1	0.000e+00
TPV-DO_00026_VS_TPV-SL_00027	-1514.518391	1.0573	152.2	768.8	0.0167	0.0329	1.9667		-1673.509078	0.4785	156.2	764.8	1.0000	0.1595	0.1595		317.981374	1	0.000e+00
TPV-DO_00027_VS_TPV-SL_00028	-505.686981	2.7472	60.6	230.4	0.0320	0.1254	3.9185		-528.744889	0.7425	60.2	230.8	1.0000	0.2475	0.2475		46.115816	1	1.115e-11
TPV-DO_00028_VS_TPV-SL_00029	-2159.322335	1.0783	233.4	906.6	0.0794	0.1066	1.3418		-2266.275554	0.7176	250.5	889.5	1.0000	0.2392	0.2392		213.906438	1	0.000e+00
TPV-DO_00029_VS_TPV-SL_00030	-1530.118056	3.4673	148.6	574.4	0.0838	0.3558	4.2467		-1566.208958	1.6228	149.9	573.1	1.0000	0.5409	0.5409		72.181804	1	0.000e+00
TPV-DO_00030_VS_TPV-SL_00031	-933.812076	2.8347	115.3	382.7	0.0580	0.1983	3.4218		-964.923140	1.0651	121.3	376.7	1.0000	0.3550	0.3550		62.222128	1	3.109e-15
TPV-DO_00031_VS_TPV-SL_00032	-1439.181131	1.2780	154.1	652.9	0.0356	0.0690	1.9381		-1550.923044	0.6375	166.5	640.5	1.0000	0.2125	0.2125		223.483826	1	0.000e+00
TPV-DO_00032_VS_TPV-SL_00033	-2184.542384	3.3373	231.2	905.8	0.0379	0.1806	4.7639		-2287.792239	1.0638	246.9	890.1	1.0000	0.3546	0.3546		206.49971	1	0.000e+00
TPV-DO_00033_VS_TPV-SL_00034	-2539.630786	2.2292	262.1	1129.9	0.0400	0.1347	3.3662		-2670.877855	0.7774	264.3	1127.7	1.0000	0.2591	0.2591		262.494138	1	0.000e+00
TPV-DO_00034_VS_TPV-SL_00035	-959.373802	3.9162	83.9	393.1	0.0423	0.2623	6.1950		-991.409473	1.3030	84.1	392.9	1.0000	0.4343	0.4343		64.071342	1	1.221e-15
TPV-DO_00035_VS_TPV-SL_00036	-1078.217363	4.1926	110.7	456.3	0.0245	0.1595	6.5000		-1147.792680	1.0204	109.4	457.6	1.0000	0.3401	0.3401		139.150634	1	0.000e+00
TPV-DO_00036_VS_TPV-SL_00037	-802.976594	1.6364	78.8	365.2	0.0312	0.0839	2.6855		-870.461845	0.7455	79.8	364.2	1.0000	0.2485	0.2485		134.970502	1	0.000e+00
TPV-DO_00037_VS_TPV-SL_00038	-1437.744926	1.6183	142.2	631.8	0.0583	0.1360	2.3311		-1511.731399	0.8174	145.9	628.1	1.0000	0.2725	0.2725		147.972946	1	0.000e+00
TPV-DO_00038_VS_TPV-SL_00039	-514.457807	1.1198	54.7	218.3	0.2564	0.2360	0.9206		-520.948617	0.9760	55.3	217.7	1.0000	0.3253	0.3253		12.98162	1	3.146e-04
TPV-DO_00039_VS_TPV-SL_00040	-3323.989183	0.9097	383.1	1419.9	0.0786	0.0869	1.1051		-3498.207336	0.6514	390.3	1412.7	1.0000	0.2171	0.2171		348.436306	1	0.000e+00
TPV-DO_00040_VS_TPV-SL_00041	-2229.454840	1.1462	247.6	1015.4	0.0310	0.0536	1.7292		-2435.566137	0.6137	250.0	1013.0	1.0000	0.2046	0.2046		412.222594	1	0.000e+00
TPV-DO_00041_VS_TPV-SL_00042	-2461.062056	8.3550	175.1	976.9	0.0242	0.3912	16.1368		-2552.549513	1.9706	181.3	970.7	1.0000	0.6569	0.6569		182.974914	1	0.000e+00
TPV-DO_00043_VS_TPV-SL_00043	-728.766516	1.4650	102.6	332.4	0.0309	0.0582	1.8821		-779.653133	0.5498	100.2	334.8	1.0000	0.1833	0.1833		101.773234	1	0.000e+00
TPV-DO_00044_VS_TPV-SL_00044	-1554.421446	2.1101	167.0	670.0	0.0530	0.1541	2.9064		-1639.343173	0.9486	170.1	666.9	1.0000	0.3162	0.3162		169.843454	1	0.000e+00
TPV-DO_00045_VS_TPV-SL_00045	-1350.750787	2.1328	162.2	599.8	0.0351	0.1037	2.9569		-1437.962977	0.7618	162.5	599.5	1.0000	0.2539	0.2539		174.42438	1	0.000e+00
TPV-DO_00046_VS_TPV-SL_00046	-2210.386548	1.4079	230.2	879.8	0.1013	0.1653	1.6315		-2303.841256	0.9389	231.0	879.0	1.0000	0.3130	0.3130		186.909416	1	0.000e+00
TPV-DO_00047_VS_TPV-SL_00047	-1087.650617	2.0797	133.8	475.2	0.0499	0.1336	2.6799		-1130.035274	0.7692	133.8	475.2	1.0000	0.2564	0.2564		84.769314	1	0.000e+00
TPV-DO_00048_VS_TPV-SL_00048	-2491.333854	0.8956	273.4	1235.6	0.0200	0.0302	1.5115		-2724.966596	0.4382	275.2	1233.8	1.0000	0.1461	0.1461		467.265484	1	0.000e+00
TPV-DO_00049_VS_TPV-SL_00052	-1503.573454	0.7072	167.5	723.5	0.0392	0.0420	1.0724		-1614.174913	0.4570	168.3	722.7	1.0000	0.1523	0.1523		221.202918	1	0.000e+00
TPV-DO_00050_VS_TPV-SL_00053	-1052.195050	1.9912	130.0	524.0	0.0135	0.0428	3.1679		-1149.065928	0.5330	133.6	520.4	1.0000	0.1777	0.1777		193.741756	1	0.000e+00
TPV-DO_00052_VS_TPV-SL_00054	-423.680352	2.2258	38.4	192.6	0.0291	0.1133	3.8960		-448.493613	0.6837	37.8	193.2	1.0000	0.2279	0.2279		49.626522	1	1.860e-12
TPV-DO_00053_VS_TPV-SL_00055	-1479.394050	3.2284	135.1	620.9	0.0399	0.2030	5.0895		-1561.646312	1.1336	135.1	620.9	1.0000	0.3779	0.3779		164.504524	1	0.000e+00
TPV-DO_00055_VS_TPV-SL_00057	-1806.377129	1.1656	190.9	844.1	0.0463	0.0809	1.7488		-1928.329349	0.6495	195.5	839.5	1.0000	0.2165	0.2165		243.90444	1	0.000e+00
TPV-DO_00056_VS_TPV-SL_00058	-1900.923012	1.4507	184.0	881.0	0.0344	0.0826	2.4034		-2054.563726	0.6727	182.0	883.0	1.0000	0.2242	0.2242		307.281428	1	0.000e+00
TPV-DO_00057_VS_TPV-SL_00059	-672.823386	2.3004	63.6	251.4	0.0882	0.2482	2.8157		-705.022218	1.4116	67.3	247.7	1.0000	0.4705	0.4705		64.397664	1	9.992e-16
TPV-DO_00058_VS_TPV-SL_00060	-1786.897559	0.9595	168.5	896.5	0.0356	0.0605	1.6995		-1924.027964	0.5620	175.1	889.9	1.0000	0.1873	0.1873		274.26081	1	0.000e+00
TPV-DO_00059_VS_TPV-SL_00061	-2886.036208	0.3891	377.4	1461.6	0.0384	0.0211	0.5502		-3047.443701	0.3007	394.3	1444.7	1.0000	0.1002	0.1002		322.814986	1	0.000e+00
TPV-DO_00060_VS_TPV-SL_00062	-809.944089	0.9075	89.9	396.1	0.0552	0.0726	1.3156		-853.302570	0.5092	88.9	397.1	1.0000	0.1697	0.1697		86.716962	1	0.000e+00
TPV-DO_00061_VS_TPV-SL_00063	-1508.131079	1.4947	155.0	727.0	0.0368	0.0890	2.4176		-1606.654498	0.6455	158.5	723.5	1.0000	0.2152	0.2152		197.046838	1	0.000e+00
TPV-DO_00062_VS_TPV-SL_00064	-504.511671	1.8779	51.1	185.9	0.1369	0.2654	1.9380		-518.752730	1.2862	51.4	185.6	1.0000	0.4287	0.4287		28.482118	1	9.457e-08
TPV-DO_00063_VS_TPV-SL_00065	-3227.160716	1.8726	409.5	1522.5	0.0262	0.0703	2.6839		-3443.801926	0.5876	413.2	1518.8	1.0000	0.1959	0.1959		433.28242	1	0.000e+00
TPV-DO_00064_VS_TPV-SL_00066	-3014.071947	2.1621	300.5	1259.5	0.0570	0.1722	3.0199		-3168.304509	1.0268	304.8	1255.2	1.0000	0.3423	0.3423		308.465124	1	0.000e+00
TPV-DO_00065_VS_TPV-SL_00067	-3034.317903	1.2803	345.0	1464.0	0.0276	0.0553	2.0032		-3278.687228	0.5844	374.5	1434.5	1.0000	0.1948	0.1948		488.73865	1	0.000e+00
TPV-DO_00066_VS_TPV-SL_00068	-2526.879693	1.1675	319.4	1147.6	0.0212	0.0353	1.6610		-2790.647052	0.5757	322.9	1144.1	1.0000	0.1919	0.1919		527.534718	1	0.000e+00
TPV-DO_00067_VS_TPV-SL_00069	-881.916610	1.9072	87.4	416.6	0.0241	0.0792	3.2887		-943.702093	0.5893	88.0	416.0	1.0000	0.1964	0.1964		123.570966	1	0.000e+00
TPV-DO_00068_VS_TPV-SL_00070	-2754.077577	1.1747	340.4	1012.6	0.1390	0.1531	1.1011		-2850.841461	0.9019	354.8	998.2	1.0000	0.3006	0.3006		193.527768	1	0.000e+00
TPV-DO_00070_VS_TPV-SL_00071	-1706.238322	5.1918	198.5	770.5	0.0200	0.1569	7.8406		-1817.567204	1.0105	201.7	767.3	1.0000	0.3368	0.3368		222.657764	1	0.000e+00
TPV-DO_00071_VS_TPV-SL_00072	-3390.128288	1.1147	430.9	1669.1	0.0156	0.0266	1.7074		-3721.228204	0.4613	437.5	1662.5	1.0000	0.1538	0.1538		662.199832	1	0.000e+00
TPV-DO_00072_VS_TPV-SL_00073	-1463.850128	1.2099	175.9	733.1	0.0206	0.0396	1.9192		-1603.630010	0.5584	188.3	720.7	1.0000	0.1861	0.1861		279.559764	1	0.000e+00
TPV-DO_00077_VS_TPV-SL_00079	-1484.432491	1.8490	161.0	721.0	0.0108	0.0349	3.2202		-1657.181661	0.5454	160.5	721.5	1.0000	0.1818	0.1818		345.49834	1	0.000e+00
TPV-DO_00078_VS_TPV-SL_00080	-1301.843780	1.1992	142.7	589.3	0.0583	0.0964	1.6525		-1373.279793	0.6551	144.3	587.7	1.0000	0.2184	0.2184		142.872026	1	0.000e+00
TPV-DO_00079_VS_TPV-SL_00081	-635.578086	1.3526	63.2	302.8	0.0334	0.0753	2.2516		-681.658028	0.5982	66.8	299.2	1.0000	0.1994	0.1994		92.159884	1	0.000e+00
TPV-DO_00080_VS_TPV-SL_00082	-820.101432	1.9232	81.5	359.5	0.0495	0.1409	2.8490		-863.926116	0.8268	80.7	360.3	1.0000	0.2756	0.2756		87.649368	1	0.000e+00
TPV-DO_00081_VS_TPV-SL_00083	-968.335146	1.4481	98.3	444.7	0.0482	0.1056	2.1887		-1016.644054	0.6453	104.0	439.0	1.0000	0.2151	0.2151		96.617816	1	0.000e+00
TPV-DO_00082_VS_TPV-SL_00084	-1271.992377	5.9473	138.6	578.4	0.0118	0.1150	9.7779		-1356.974810	0.7514	139.1	577.9	1.0000	0.2505	0.2505		169.964866	1	0.000e+00
TPV-DO_00083_VS_TPV-SL_00085	-1127.654596	0.9379	110.2	522.8	0.1082	0.1283	1.1867		-1162.495205	0.6458	112.6	520.4	1.0000	0.2153	0.2153		69.681218	1	1.110e-16
TPV-DO_00084_VS_TPV-SL_00086	-2188.242430	1.0334	240.4	1007.6	0.0575	0.0829	1.4409		-2312.770311	0.6245	255.4	992.6	1.0000	0.2082	0.2082		249.055762	1	0.000e+00
TPV-DO_00087_VS_TPV-SL_00089	-1509.469619	1.2183	151.0	740.0	0.0364	0.0741	2.0339		-1602.204814	0.5695	172.9	718.1	1.0000	0.1898	0.1898		185.47039	1	0.000e+00
TPV-DO_00088_VS_TPV-SL_00090	-749.062882	16.0937	78.2	290.8	0.0135	0.3262	24.0860		-769.263667	1.5092	79.3	289.7	1.0000	0.5031	0.5031		40.40157	1	2.068e-10
TPV-DO_00089_VS_TPV-SL_00091	-898.175276	0.9022	87.8	422.2	0.0452	0.0648	1.4344		-961.684470	0.5909	96.2	413.8	1.0000	0.1970	0.1970		127.018388	1	0.000e+00
TPV-DO_00090_VS_TPV-SL_00092	-449.721158	1.2710	66.1	197.9	0.0490	0.0723	1.4761		-476.421336	0.6186	67.2	196.8	1.0000	0.2062	0.2062		53.400356	1	2.720e-13
TPV-DO_00091_VS_TPV-SL_00093	-544.736560	0.9131	80.0	268.0	0.0156	0.0197	1.2577		-589.197091	0.4528	93.8	254.2	1.0000	0.1509	0.1509		88.921062	1	0.000e+00
TPV-DO_00092_VS_TPV-SL_00095	-1154.415624	1.3499	121.7	418.3	0.2547	0.2712	1.0648		-1172.492365	1.1716	123.9	416.1	1.0000	0.3905	0.3905		36.153482	1	1.824e-09
TPV-DO_00093_VS_TPV-SL_00097	-1130.533458	2.1076	77.0	433.0	0.1290	0.3479	2.6966		-1158.268741	1.6294	81.8	428.2	1.0000	0.5431	0.5431		55.470566	1	9.492e-14
TPV-DO_00094_VS_TPV-SL_00098	-2525.434730	3.1787	234.3	881.7	0.0822	0.3167	3.8551		-2612.930496	1.6005	238.7	877.3	1.0000	0.5335	0.5335		174.991532	1	0.000e+00
TPV-DO_00095_VS_TPV-SL_00099	-2762.415678	1.9607	271.2	1135.8	0.0730	0.1895	2.5966		-2872.063228	0.9873	271.3	1135.7	1.0000	0.3291	0.3291		219.2951	1	0.000e+00
TPV-DO_00096_VS_TPV-SL_00100	-622.998094	2.8876	61.0	320.0	0.0074	0.0428	5.7920		-697.708583	0.5584	71.4	309.6	1.0000	0.1861	0.1861		149.420978	1	0.000e+00
TPV-DO_00097_VS_TPV-SL_00101	-1173.637950	1.6162	113.8	492.2	0.0887	0.1839	2.0741		-1219.306638	1.0098	121.7	484.3	1.0000	0.3366	0.3366		91.337376	1	0.000e+00
TPV-DO_00098_VS_TPV-SL_00103	-941.361147	1.2558	100.4	460.6	0.0278	0.0578	2.0743		-1012.971789	0.5347	114.4	446.6	1.0000	0.1782	0.1782		143.221284	1	0.000e+00
TPV-DO_00099_VS_TPV-SL_00105	-4935.681609	1.2671	577.5	2182.5	0.0397	0.0697	1.7552		-5295.167284	0.6305	583.3	2176.7	1.0000	0.2102	0.2102		718.97135	1	0.000e+00
TPV-DO_00100_VS_TPV-SL_00106	-530.478120	3.8857	51.4	224.6	0.0305	0.1872	6.1341		-563.743892	1.1848	52.2	223.8	1.0000	0.3949	0.3949		66.531544	1	3.331e-16
TPV-DO_00101_VS_TPV-SL_00107	-2549.452755	1.4092	230.7	1080.3	0.1240	0.2094	1.6891		-2610.248966	0.9595	235.5	1075.5	1.0000	0.3198	0.3198		121.592422	1	0.000e+00
TPV-DO_00102_VS_TPV-SL_00108	-1067.763858	1.8695	125.9	498.1	0.0251	0.0704	2.8095		-1160.134783	0.6809	124.4	499.6	1.0000	0.2270	0.2270		184.74185	1	0.000e+00
TPV-DO_00103_VS_TPV-SL_00109	-4606.863040	1.4786	489.1	2045.9	0.0386	0.0849	2.1994		-4963.831461	0.7058	500.4	2034.6	1.0000	0.2353	0.2353		713.936842	1	0.000e+00
TPV-DO_00105_VS_TPV-SL_00111	-1568.210974	1.5517	133.5	646.5	0.1064	0.2122	1.9950		-1623.802982	1.0568	134.5	645.5	1.0000	0.3523	0.3523		111.184016	1	0.000e+00
TPV-DO_00106_VS_TPV-SL_00112	-555.141811	1.5864	59.3	255.7	0.0394	0.0946	2.3994		-586.712204	0.6769	63.1	251.9	1.0000	0.2256	0.2256		63.140786	1	1.887e-15
TPV-DO_00107_VS_TPV-SL_00113	-1241.675273	2.0186	133.2	469.8	0.1476	0.2957	2.0031		-1275.483268	1.4603	133.2	469.8	1.0000	0.4868	0.4868		67.61599	1	2.220e-16
TPV-DO_00108_VS_TPV-SL_00115	-1162.081243	2.4160	103.0	512.0	0.0441	0.1739	3.9426		-1219.687093	0.9636	105.7	509.3	1.0000	0.3212	0.3212		115.2117	1	0.000e+00
TPV-DO_00110_VS_TPV-SL_00116	-2308.590416	1.1859	238.4	985.6	0.0699	0.1100	1.5749		-2432.169650	0.7272	244.2	979.8	1.0000	0.2424	0.2424		247.158468	1	0.000e+00
TPV-DO_00111_VS_TPV-SL_00117	-1046.556332	2.7807	103.0	431.0	0.0557	0.2170	3.8976		-1091.669306	1.1747	103.4	430.6	1.0000	0.3916	0.3916		90.225948	1	0.000e+00
TPV-DO_00112_VS_TPV-SL_00118	-724.368322	1.7094	93.2	302.8	0.0889	0.1671	1.8790		-750.147921	0.9081	94.3	301.7	1.0000	0.3027	0.3027		51.559198	1	6.947e-13
TPV-DO_00113_VS_TPV-SL_00119	-729.543299	50.0000	58.9	322.1	0.0015	0.1643	106.9604		-771.947067	0.9654	63.2	317.8	1.0000	0.3218	0.3218		84.807536	1	0.000e+00
TPV-DO_00114_VS_TPV-SL_00121	-4392.226227	1.5730	413.5	1833.5	0.0615	0.1377	2.2388		-4652.076388	0.9139	421.8	1825.2	1.0000	0.3046	0.3046		519.700322	1	0.000e+00
TPV-DO_00115_VS_TPV-SL_00122	-2028.864014	1.0487	233.0	922.0	0.0351	0.0534	1.5216		-2198.103440	0.5928	232.7	922.3	1.0000	0.1976	0.1976		338.478852	1	0.000e+00
TPV-DO_00117_VS_TPV-SL_00123	-1111.465052	1.3556	96.0	492.0	0.1055	0.1895	1.7960		-1143.914778	0.9290	102.1	485.9	1.0000	0.3097	0.3097		64.899452	1	7.772e-16
TPV-DO_00123_VS_TPV-SL_00129	-2461.656559	3.1392	214.2	1000.8	0.0664	0.3007	4.5312		-2537.810192	1.4675	228.6	986.4	1.0000	0.4892	0.4892		152.307266	1	0.000e+00
TPV-DO_00124_VS_TPV-SL_00130	-1802.626251	5.0540	174.4	731.6	0.0311	0.2410	7.7424		-1882.739226	1.3670	190.3	715.7	1.0000	0.4557	0.4557		160.22595	1	0.000e+00
TPV-DO_00125_VS_TPV-SL_00133	-2649.787309	1.3519	276.3	1199.7	0.0331	0.0697	2.1042		-2869.857622	0.6565	290.2	1185.8	1.0000	0.2188	0.2188		440.140626	1	0.000e+00
TPV-DO_00126_VS_TPV-SL_00134	-525.201268	3.7038	62.4	255.6	0.0182	0.1065	5.8531		-556.668267	0.7121	66.1	251.9	1.0000	0.2374	0.2374		62.933998	1	2.109e-15
TPV-DO_00128_VS_TPV-SL_00135	-954.245603	1.9141	92.0	439.0	0.0330	0.1049	3.1821		-1020.303090	0.7438	93.1	437.9	1.0000	0.2479	0.2479		132.114974	1	0.000e+00
TPV-DO_00129_VS_TPV-SL_00136	-2093.459356	1.2080	220.1	958.9	0.0592	0.1015	1.7147		-2199.660657	0.6471	223.9	955.1	1.0000	0.2157	0.2157		212.402602	1	0.000e+00
TPV-DO_00130_VS_TPV-SL_00137	-2545.723604	1.4538	232.4	1075.6	0.0701	0.1443	2.0595		-2674.523550	0.8991	239.3	1068.7	1.0000	0.2997	0.2997		257.599892	1	0.000e+00
TPV-DO_00131_VS_TPV-SL_00138	-2682.063057	1.8910	289.4	1204.6	0.0351	0.0998	2.8389		-2867.326637	0.7807	306.3	1187.7	1.0000	0.2602	0.2602		370.52716	1	0.000e+00
TPV-DO_00132_VS_TPV-SL_00139	-926.515868	1.3483	81.3	374.7	0.0985	0.1708	1.7339		-964.699484	0.9505	83.1	372.9	1.0000	0.3168	0.3168		76.367232	1	0.000e+00
TPV-DO_00141_VS_TPV-SL_00145	-516.797981	1.0935	49.3	220.7	0.1205	0.1563	1.2973		-533.796585	0.8285	52.8	217.2	1.0000	0.2762	0.2762		33.997208	1	5.519e-09
TPV-DO_00142_VS_TPV-SL_00146	-874.162697	3.7205	94.2	421.8	0.0132	0.0848	6.4139		-946.918855	0.6523	91.9	424.1	1.0000	0.2174	0.2174		145.512316	1	0.000e+00
TPV-DO_00143_VS_TPV-SL_00148	-1228.089579	1.6322	132.0	531.0	0.0442	0.1025	2.3205		-1299.451974	0.7204	135.5	527.5	1.0000	0.2401	0.2401		142.72479	1	0.000e+00
TPV-DO_00144_VS_TPV-SL_00149	-3406.378669	0.7795	367.4	1708.6	0.0225	0.0299	1.3290		-3723.692177	0.4339	380.9	1695.1	1.0000	0.1446	0.1446		634.627016	1	0.000e+00
TPV-DO_00145_VS_TPV-SL_00150	-2045.954057	0.5468	217.1	991.9	0.0686	0.0530	0.7728		-2136.569749	0.4248	258.9	950.1	1.0000	0.1416	0.1416		181.231384	1	0.000e+00
TPV-DO_00146_VS_TPV-SL_00151	-1174.624879	2.1934	143.7	522.3	0.0394	0.1169	2.9640		-1235.357921	0.7930	153.7	512.3	1.0000	0.2643	0.2643		121.466084	1	0.000e+00
TPV-DO_00147_VS_TPV-SL_00152	-2792.988389	3.0622	279.8	1244.2	0.0196	0.1004	5.1141		-3007.768115	0.8158	305.3	1218.7	1.0000	0.2719	0.2719		429.559452	1	0.000e+00
TPV-DO_00148_VS_TPV-SL_00153	-681.574822	1.4883	60.5	308.5	0.0593	0.1378	2.3230		-713.697932	0.8268	68.6	300.4	1.0000	0.2756	0.2756		64.24622	1	1.110e-15
TPV-DO_00159_VS_TPV-SL_00168	-611.313890	9.4413	62.0	241.0	0.0142	0.2068	14.5712		-645.360429	1.4357	67.2	235.8	1.0000	0.4786	0.4786		68.093078	1	1.110e-16
TPV-DO_00160_VS_TPV-SL_00169	-1192.724937	1.2790	127.3	505.7	0.1616	0.2086	1.2909		-1217.271172	0.9710	137.8	495.2	1.0000	0.3237	0.3237		49.09247	1	2.442e-12
TPV-DO_00161_VS_TPV-SL_00170	-2546.605291	1.4434	285.1	1157.9	0.0311	0.0672	2.1625		-2763.955496	0.6742	286.9	1156.1	1.0000	0.2247	0.2247		434.70041	1	0.000e+00
TPV-DO_00162_VS_TPV-SL_00171	-1804.887940	1.5677	182.2	816.8	0.0293	0.0741	2.5323		-1952.844278	0.6722	187.6	811.4	1.0000	0.2241	0.2241		295.912676	1	0.000e+00
TPV-DO_00163_VS_TPV-SL_00172	-836.479045	4.0499	78.2	308.8	0.0741	0.3829	5.1695		-865.066873	2.0362	80.4	306.6	1.0000	0.6787	0.6787		57.175656	1	3.986e-14
TPV-DO_00164_VS_TPV-SL_00173	-1263.100777	1.6331	149.1	468.9	0.1950	0.2728	1.3988		-1281.512676	1.2551	160.1	457.9	1.0000	0.4184	0.4184		36.823798	1	1.293e-09
TPV-DO_00172_VS_TPV-SL_00183	-768.826074	3.8706	83.8	306.2	0.0501	0.2542	5.0766		-796.693883	1.3052	84.2	305.8	1.0000	0.4351	0.4351		55.735618	1	8.293e-14
TPV-DO_00173_VS_TPV-SL_00184	-899.161649	1.8988	74.8	372.2	0.0856	0.2270	2.6518		-930.279084	1.1436	79.3	367.7	1.0000	0.3812	0.3812		62.23487	1	2.998e-15
TPV-DO_00174_VS_TPV-SL_00185	-850.971984	1.2930	55.6	391.4	0.0630	0.1512	2.3999		-891.053923	0.8031	56.4	390.6	1.0000	0.2677	0.2677		80.163878	1	0.000e+00
TPV-DO_00182_VS_TPV-SL_00188	-804.801594	50.0000	82.5	319.5	0.0024	0.1894	80.5254		-835.667789	1.1803	94.0	308.0	1.0000	0.3934	0.3934		61.73239	1	3.886e-15
TPV-DO_00183_VS_TPV-SL_00189	-1081.233028	1.0734	110.5	480.5	0.0469	0.0745	1.5891		-1159.227310	0.6603	118.6	472.4	1.0000	0.2201	0.2201		155.988564	1	0.000e+00
TPV-DO_00184_VS_TPV-SL_00190	-2659.125723	1.9243	270.6	1106.4	0.0594	0.1560	2.6259		-2781.204316	0.9336	292.2	1084.8	1.0000	0.3112	0.3112		244.157186	1	0.000e+00
TPV-DO_00185_VS_TPV-SL_00192	-1443.403896	1.0071	144.4	671.6	0.0614	0.0906	1.4760		-1522.346908	0.6271	152.0	664.0	1.0000	0.2090	0.2090		157.886024	1	0.000e+00
TPV-DO_00186_VS_TPV-SL_00193	-1768.381107	2.5172	159.9	767.1	0.0414	0.1680	4.0585		-1859.729244	1.0412	169.5	757.5	1.0000	0.3471	0.3471		182.696274	1	0.000e+00
TPV-DO_00187_VS_TPV-SL_00195	-3189.458059	1.0655	317.7	1470.3	0.0605	0.0944	1.5619		-3373.754069	0.6639	325.8	1462.2	1.0000	0.2213	0.2213		368.59202	1	0.000e+00
TPV-DO_00188_VS_TPV-SL_00196	-736.424740	2.5094	108.3	359.7	0.0296	0.0975	3.2918		-774.474617	0.7493	130.9	337.1	1.0000	0.2498	0.2498		76.099754	1	0.000e+00
TPV-DO_00191_VS_TPV-SL_00201	-744.859879	1.5031	87.1	320.9	0.0721	0.1337	1.8537		-778.224276	0.7970	91.9	316.1	1.0000	0.2657	0.2657		66.728794	1	3.331e-16
TPV-DO_00192_VS_TPV-SL_00202	-1770.141883	1.4963	191.9	783.1	0.0321	0.0719	2.2413		-1928.601914	0.7043	193.4	781.6	1.0000	0.2348	0.2348		316.920062	1	0.000e+00
TPV-DO_00199_VS_TPV-SL_00208	-1391.809334	1.0238	156.9	671.1	0.0329	0.0520	1.5788		-1489.330497	0.5117	177.5	650.5	1.0000	0.1706	0.1706		195.042326	1	0.000e+00
TPV-DO_00200_VS_TPV-SL_00209	-717.114127	1.1313	80.1	300.9	0.1210	0.1492	1.2334		-743.241445	0.8624	81.4	299.6	1.0000	0.2875	0.2875		52.254636	1	4.875e-13
TPV-DO_00201_VS_TPV-SL_00210	-4561.665673	3.0405	493.5	2023.5	0.0299	0.1376	4.6047		-4825.612464	0.8542	504.7	2012.3	1.0000	0.2847	0.2847		527.893582	1	0.000e+00
TPV-DO_00202_VS_TPV-SL_00211	-1369.551921	9.0350	169.8	565.2	0.0116	0.1456	12.5498		-1450.823027	0.9378	173.2	561.8	1.0000	0.3126	0.3126		162.542212	1	0.000e+00
TPV-DO_00203_VS_TPV-SL_00212	-2136.267582	1.5382	212.5	996.5	0.0307	0.0782	2.5499		-2316.323438	0.6848	220.5	988.5	1.0000	0.2283	0.2283		360.111712	1	0.000e+00
TPV-DO_00204_VS_TPV-SL_00214	-1746.140573	1.4257	175.3	790.7	0.0471	0.1017	2.1595		-1840.253816	0.6824	192.4	773.6	1.0000	0.2275	0.2275		188.226486	1	0.000e+00
TPV-DO_00205_VS_TPV-SL_00215	-597.579474	5.3409	63.2	251.8	0.0138	0.1157	8.4079		-652.614452	0.9463	64.5	250.5	1.0000	0.3154	0.3154		110.069956	1	0.000e+00
TPV-DO_00206_VS_TPV-SL_00217	-1919.158086	1.2575	198.8	866.2	0.0348	0.0678	1.9502		-2081.621276	0.6924	221.2	843.8	1.0000	0.2308	0.2308		324.92638	1	0.000e+00
TPV-DO_00207_VS_TPV-SL_00219	-1532.943621	3.9906	123.8	608.2	0.0486	0.3085	6.3494		-1589.470781	1.5344	131.4	600.6	1.0000	0.5115	0.5115		113.05432	1	0.000e+00
TPV-DO_00209_VS_TPV-SL_00221	-1542.852505	3.0294	172.0	626.0	0.0431	0.1744	4.0493		-1626.741966	1.0618	175.6	622.4	1.0000	0.3539	0.3539		167.778922	1	0.000e+00
TPV-DO_00210_VS_TPV-SL_00222	-642.535542	3.1956	62.0	250.0	0.0574	0.2502	4.3547		-669.218175	1.2477	60.1	251.9	1.0000	0.4159	0.4159		53.365266	1	2.770e-13
TPV-DO_00211_VS_TPV-SL_00223	-1627.954821	1.0669	185.4	777.6	0.0350	0.0564	1.6104		-1745.564224	0.5237	190.7	772.3	1.0000	0.1746	0.1746		235.218806	1	0.000e+00
TPV-DO_00212_VS_TPV-SL_00224	-1158.757864	1.1365	127.8	481.2	0.0803	0.1113	1.3866		-1215.687600	0.7696	136.6	472.4	1.0000	0.2565	0.2565		113.859472	1	0.000e+00
TPV-DO_00213_VS_TPV-SL_00225	-2395.767003	1.1496	266.9	984.1	0.1052	0.1362	1.2942		-2482.522044	0.7924	285.8	965.2	1.0000	0.2641	0.2641		173.510082	1	0.000e+00
TPV-DO_00214_VS_TPV-SL_00226	-3140.949798	0.6379	408.1	1556.9	0.0158	0.0152	0.9656		-3427.403542	0.3923	418.2	1546.8	1.0000	0.1308	0.1308		572.907488	1	0.000e+00
TPV-DO_00215_VS_TPV-SL_00227	-1184.166403	1.0327	143.8	585.2	0.0138	0.0228	1.6525		-1314.689061	0.4733	146.3	582.7	1.0000	0.1578	0.1578		261.045316	1	0.000e+00
TPV-DO_00216_VS_TPV-SL_00228	-524.437224	4.5398	84.5	215.5	0.0195	0.0998	5.1174		-551.256844	0.6589	80.5	219.5	1.0000	0.2196	0.2196		53.63924	1	2.409e-13
TPV-DO_00217_VS_TPV-SL_00229	-1661.305996	1.2601	204.9	758.1	0.0499	0.0832	1.6659		-1756.140403	0.6105	208.9	754.1	1.0000	0.2035	0.2035		189.668814	1	0.000e+00
TPV-DO_00218_VS_TPV-SL_00230	-498.976493	2.7569	56.8	234.2	0.0207	0.0898	4.3374		-526.247379	0.6510	64.6	226.4	1.0000	0.2170	0.2170		54.541772	1	1.522e-13
TPV-DO_00219_VS_TPV-SL_00231	-2249.169987	1.3182	207.1	1055.9	0.0478	0.1030	2.1543		-2382.955092	0.7035	228.5	1034.5	1.0000	0.2345	0.2345		267.57021	1	0.000e+00
TPV-DO_00220_VS_TPV-SL_00232	-1748.589831	1.9274	166.3	721.7	0.0925	0.2264	2.4476		-1815.617983	1.2100	168.4	719.6	1.0000	0.4033	0.4033		134.056304	1	0.000e+00
TPV-DO_00221_VS_TPV-SL_00233	-1343.744805	0.8115	150.9	668.1	0.0300	0.0389	1.2958		-1451.857216	0.4492	154.9	664.1	1.0000	0.1497	0.1497		216.224822	1	0.000e+00
TPV-DO_00222_VS_TPV-SL_00234	-423.048671	0.4663	39.1	221.9	0.0527	0.0421	0.7985		-445.758332	0.3611	42.6	218.4	1.0000	0.1204	0.1204		45.419322	1	1.591e-11
TPV-DO_00223_VS_TPV-SL_00235	-902.787225	3.6951	105.8	359.2	0.0633	0.2821	4.4566		-927.297069	1.5005	105.9	359.1	1.0000	0.5002	0.5002		49.019688	1	2.534e-12
TPV-DO_00224_VS_TPV-SL_00236	-2010.842392	1.6720	225.4	716.6	0.1519	0.2385	1.5709		-2064.155720	1.1910	234.8	707.2	1.0000	0.3970	0.3970		106.626656	1	0.000e+00
TPV-DO_00225_VS_TPV-SL_00238	-1418.089823	0.6732	178.4	703.6	0.0244	0.0247	1.0121		-1534.527713	0.4070	191.1	690.9	1.0000	0.1357	0.1357		232.87578	1	0.000e+00
TPV-DO_00226_VS_TPV-SL_00239	-1327.091716	2.4999	121.1	592.9	0.0357	0.1494	4.1831		-1398.503976	0.8977	126.0	588.0	1.0000	0.2992	0.2992		142.82452	1	0.000e+00
TPV-DO_00227_VS_TPV-SL_00240	-1841.950688	1.2741	212.7	981.3	0.0121	0.0274	2.2580		-2019.706697	0.4009	211.1	982.9	1.0000	0.1336	0.1336		355.512018	1	0.000e+00
TPV-DO_00228_VS_TPV-SL_00241	-1173.971829	1.0899	137.5	576.5	0.0189	0.0331	1.7482		-1288.635537	0.5003	143.1	570.9	1.0000	0.1668	0.1668		229.327416	1	0.000e+00
TPV-DO_00229_VS_TPV-SL_00242	-2310.801979	1.1706	284.2	852.8	0.1580	0.1673	1.0590		-2380.448556	0.9203	298.7	838.3	1.0000	0.3068	0.3068		139.293154	1	0.000e+00
TPV-DO_00230_VS_TPV-SL_00243	-851.822779	1.4299	86.8	339.2	0.1502	0.2214	1.4741		-868.058266	0.9921	90.5	335.5	1.0000	0.3307	0.3307		32.470974	1	1.210e-08
TPV-DO_00232_VS_TPV-SL_00245	-1216.727215	1.4032	137.3	582.7	0.0344	0.0737	2.1406		-1301.779973	0.6120	143.6	576.4	1.0000	0.2040	0.2040		170.105516	1	0.000e+00
TPV-DO_00233_VS_TPV-SL_00246	-792.865469	0.9018	89.8	408.2	0.0148	0.0232	1.5615		-875.503863	0.4447	88.7	409.3	1.0000	0.1482	0.1482		165.276788	1	0.000e+00
TPV-DO_00234_VS_TPV-SL_00247	-1142.254784	0.8702	131.7	537.3	0.0483	0.0594	1.2309		-1220.175824	0.5280	131.2	537.8	1.0000	0.1760	0.1760		155.84208	1	0.000e+00
TPV-DO_00235_VS_TPV-SL_00248	-1024.210365	18.0910	99.1	449.9	0.0045	0.1477	32.7206		-1084.367237	0.9259	97.4	451.6	1.0000	0.3086	0.3086		120.313744	1	0.000e+00
TPV-DO_00236_VS_TPV-SL_00249	-785.369346	0.9575	88.0	368.0	0.0437	0.0611	1.3990		-838.881629	0.5493	91.2	364.8	1.0000	0.1831	0.1831		107.024566	1	0.000e+00
TPV-DO_00237_VS_TPV-SL_00250	-4441.290239	1.6410	482.6	1893.4	0.0454	0.1037	2.2859		-4738.928788	0.7958	491.3	1884.7	1.0000	0.2653	0.2653		595.277098	1	0.000e+00
TPV-DO_00238_VS_TPV-SL_00251	-2047.926187	0.9119	229.6	946.4	0.0325	0.0446	1.3731		-2229.372201	0.5558	231.4	944.6	1.0000	0.1853	0.1853		362.892028	1	0.000e+00
TPV-DO_00239_VS_TPV-SL_00252	-1030.682896	3.6389	111.1	380.9	0.0634	0.2796	4.4117		-1061.508354	1.4111	113.6	378.4	1.0000	0.4704	0.4704		61.650916	1	4.108e-15
TPV-DO_00240_VS_TPV-SL_00253	-3104.307750	2.6113	269.7	1245.3	0.0670	0.2502	3.7348		-3221.136190	1.2778	281.5	1233.5	1.0000	0.4259	0.4259		233.65688	1	0.000e+00
TPV-DO_00241_VS_TPV-SL_00254	-1420.794399	8.6061	155.2	540.8	0.0221	0.2642	11.9411		-1480.924125	1.3369	153.2	542.8	1.0000	0.4456	0.4456		120.259452	1	0.000e+00
TPV-DO_00242_VS_TPV-SL_00255	-2383.433978	0.8651	291.5	1112.5	0.0284	0.0356	1.2528		-2587.975672	0.4979	299.8	1104.2	1.0000	0.1660	0.1660		409.083388	1	0.000e+00
TPV-DO_00243_VS_TPV-SL_00256	-295.695119	1.5639	32.5	141.5	0.0205	0.0526	2.5601		-327.706029	0.6094	31.5	142.5	1.0000	0.2031	0.2031		64.02182	1	1.221e-15
TPV-DO_00244_VS_TPV-SL_00257	-1992.935214	2.7517	170.1	846.9	0.0248	0.1212	4.8815		-2169.886614	0.9489	173.2	843.8	1.0000	0.3163	0.3163		353.9028	1	0.000e+00
TPV-DO_00245_VS_TPV-SL_00258	-302.786466	0.5224	23.9	168.1	0.0406	0.0442	1.0871		-320.795183	0.3605	23.9	168.1	1.0000	0.1202	0.1202		36.017434	1	1.956e-09
TPV-DO_00246_VS_TPV-SL_00259	-734.092508	5.8390	88.1	313.9	0.0132	0.1120	8.4843		-784.783431	0.7665	85.8	316.2	1.0000	0.2555	0.2555		101.381846	1	0.000e+00
TPV-DO_00247_VS_TPV-SL_00260	-2056.214918	0.9991	211.9	979.1	0.0325	0.0530	1.6270		-2216.618566	0.5184	216.0	975.0	1.0000	0.1728	0.1728		320.807296	1	0.000e+00
TPV-DO_00248_VS_TPV-SL_00261	-1012.334455	2.9448	100.4	433.6	0.0513	0.2193	4.2743		-1052.248671	1.2311	116.1	417.9	1.0000	0.4104	0.4104		79.828432	1	0.000e+00
TPV-DO_00249_VS_TPV-SL_00262	-833.338691	0.9092	87.9	404.1	0.0835	0.1024	1.2258		-871.896054	0.6639	88.6	403.4	1.0000	0.2213	0.2213		77.114726	1	0.000e+00
TPV-DO_00250_VS_TPV-SL_00263	-4149.365701	0.9869	448.4	1942.6	0.0443	0.0651	1.4719		-4431.752128	0.5686	459.5	1931.5	1.0000	0.1895	0.1895		564.772854	1	0.000e+00
TPV-DO_00251_VS_TPV-SL_00264	-841.419271	1.8966	84.6	410.4	0.0186	0.0630	3.3939		-915.777456	0.6015	95.4	399.6	1.0000	0.2005	0.2005		148.71637	1	0.000e+00
TPV-DO_00252_VS_TPV-SL_00265	-1513.491321	1.8384	151.2	616.8	0.1039	0.2271	2.1863		-1560.924426	1.1472	156.1	611.9	1.0000	0.3824	0.3824		94.86621	1	0.000e+00
TPV-DO_00253_VS_TPV-SL_00266	-1821.487293	0.8717	173.3	795.7	0.1148	0.1221	1.0640		-1891.104807	0.6938	174.4	794.6	1.0000	0.2313	0.2313		139.235028	1	0.000e+00
TPV-DO_00254_VS_TPV-SL_00267	-885.069641	2.2642	92.1	345.9	0.1750	0.3791	2.1663		-897.139514	1.7083	95.0	343.0	1.0000	0.5694	0.5694		24.139746	1	8.959e-07
TPV-DO_00255_VS_TPV-SL_00268	-6256.028832	1.2170	703.3	2989.7	0.0266	0.0508	1.9141		-6806.626674	0.5651	729.4	2963.6	1.0000	0.1884	0.1884		1101.195684	1	0.000e+00
TPV-DO_00256_VS_TPV-SL_00269	-577.013923	2.2913	64.1	235.9	0.0802	0.2214	2.7595		-598.222873	1.1859	64.7	235.3	1.0000	0.3953	0.3953		42.4179	1	7.371e-11
TPV-DO_00257_VS_TPV-SL_00270	-1275.873516	0.6168	157.9	574.1	0.0927	0.0661	0.7128		-1330.779438	0.4929	158.8	573.2	1.0000	0.1643	0.1643		109.811844	1	0.000e+00
TPV-DO_00258_VS_TPV-SL_00271	-1667.603418	0.8669	198.8	839.2	0.0293	0.0393	1.3430		-1793.175687	0.4474	198.6	839.4	1.0000	0.1491	0.1491		251.144538	1	0.000e+00
TPV-DO_00259_VS_TPV-SL_00272	-3583.361321	1.6816	413.9	1614.1	0.0447	0.1045	2.3387		-3780.028677	0.7090	438.3	1589.7	1.0000	0.2363	0.2363		393.334712	1	0.000e+00
TPV-DO_00260_VS_TPV-SL_00273	-1612.307254	1.7716	180.4	749.6	0.0532	0.1326	2.4937		-1682.698277	0.7884	183.9	746.1	1.0000	0.2628	0.2628		140.782046	1	0.000e+00
TPV-DO_00261_VS_TPV-SL_00274	-1492.388054	1.1465	143.8	687.2	0.0865	0.1351	1.5627		-1545.547579	0.7286	150.3	680.7	1.0000	0.2429	0.2429		106.31905	1	0.000e+00
TPV-DO_00262_VS_TPV-SL_00275	-5107.352414	0.8066	607.6	2656.4	0.0179	0.0240	1.3396		-5570.046873	0.3959	631.6	2632.4	1.0000	0.1320	0.1320		925.388918	1	0.000e+00
TPV-DO_00263_VS_TPV-SL_00276	-2276.464594	0.7704	254.5	1050.5	0.0604	0.0637	1.0539		-2406.619030	0.5274	257.5	1047.5	1.0000	0.1758	0.1758		260.308872	1	0.000e+00
TPV-DO_00264_VS_TPV-SL_00277	-1868.661775	4.8800	204.0	708.0	0.0384	0.2462	6.4186		-1945.886212	1.4176	216.4	695.6	1.0000	0.4725	0.4725		154.448874	1	0.000e+00
TPV-DO_00265_VS_TPV-SL_00280	-5724.938321	1.0818	636.8	2639.2	0.0541	0.0819	1.5155		-6040.106506	0.5907	655.3	2620.7	1.0000	0.1969	0.1969		630.33637	1	0.000e+00
TPV-DO_00266_VS_TPV-SL_00281	-1175.042132	0.8987	127.6	562.4	0.0477	0.0638	1.3389		-1245.575261	0.5228	130.2	559.8	1.0000	0.1743	0.1743		141.066258	1	0.000e+00
TPV-DO_00267_VS_TPV-SL_00282	-330.745387	0.6080	34.5	181.5	0.0458	0.0468	1.0237		-347.076595	0.3521	37.0	179.0	1.0000	0.1174	0.1174		32.662416	1	1.096e-08
TPV-DO_00268_VS_TPV-SL_00283	-1153.996697	4.1020	127.1	496.9	0.0260	0.1582	6.0942		-1247.221728	1.0441	124.9	499.1	1.0000	0.3480	0.3480		186.450062	1	0.000e+00
TPV-DO_00269_VS_TPV-SL_00284	-2442.509092	1.5282	280.4	1252.6	0.0100	0.0267	2.6661		-2737.186467	0.4793	274.1	1258.9	1.0000	0.1598	0.1598		589.35475	1	0.000e+00
TPV-DO_00270_VS_TPV-SL_00285	-1797.758367	1.2788	161.8	831.2	0.0369	0.0812	2.1994		-1942.682740	0.6621	166.8	826.2	1.0000	0.2207	0.2207		289.848746	1	0.000e+00
TPV-DO_00271_VS_TPV-SL_00286	-580.151288	3.0825	44.7	255.3	0.0295	0.1742	5.9068		-624.406271	1.2200	55.6	244.4	1.0000	0.4067	0.4067		88.509966	1	0.000e+00
TPV-DO_00272_VS_TPV-SL_00287	-2434.430612	2.2345	243.2	1118.8	0.0204	0.0778	3.8141		-2660.994262	0.7111	249.5	1112.5	1.0000	0.2370	0.2370		453.1273	1	0.000e+00
TPV-DO_00273_VS_TPV-SL_00288	-795.468688	6.1639	63.2	332.8	0.0164	0.1944	11.8470		-852.644882	1.3264	73.6	322.4	1.0000	0.4421	0.4421		114.352388	1	0.000e+00
TPV-DO_00275_VS_TPV-SL_00290	-842.528831	1.1492	76.4	403.6	0.0255	0.0541	2.1224		-906.217672	0.5376	103.7	376.3	1.0000	0.1792	0.1792		127.377682	1	0.000e+00
TPV-DO_00277_VS_TPV-SL_00293	-2761.181995	1.1572	328.0	1379.0	0.0143	0.0271	1.8935		-3053.242129	0.4694	333.4	1373.6	1.0000	0.1565	0.1565		584.120268	1	0.000e+00
TPV-DO_00278_VS_TPV-SL_00294	-1879.590669	1.0178	195.6	803.4	0.0805	0.1048	1.3021		-1972.711011	0.6918	200.4	798.6	1.0000	0.2306	0.2306		186.240684	1	0.000e+00
TPV-DO_00279_VS_TPV-SL_00295	-943.047587	2.0998	92.7	408.3	0.0445	0.1408	3.1641		-997.749706	0.9406	93.8	407.2	1.0000	0.3135	0.3135		109.404238	1	0.000e+00
TPV-DO_00280_VS_TPV-SL_00296	-4117.703955	0.8199	521.5	1866.5	0.0415	0.0452	1.0897		-4402.864753	0.5318	573.2	1814.8	1.0000	0.1773	0.1773		570.321596	1	0.000e+00
TPV-DO_00281_VS_TPV-SL_00297	-2976.632957	0.7575	335.7	1398.3	0.0445	0.0489	1.1006		-3185.742122	0.5040	337.6	1396.4	1.0000	0.1680	0.1680		418.21833	1	0.000e+00
TPV-DO_00282_VS_TPV-SL_00298	-995.989989	0.9244	111.4	500.6	0.0262	0.0397	1.5141		-1071.708939	0.4522	113.9	498.1	1.0000	0.1507	0.1507		151.4379	1	0.000e+00
TPV-DO_00283_VS_TPV-SL_00300	-2571.285555	1.2053	352.3	1189.7	0.0496	0.0748	1.5062		-2705.630230	0.6104	369.0	1173.0	1.0000	0.2035	0.2035		268.68935	1	0.000e+00
TPV-DO_00284_VS_TPV-SL_00301	-839.775802	0.9456	90.4	461.6	0.0199	0.0347	1.7470		-907.916169	0.3899	89.8	462.2	1.0000	0.1300	0.1300		136.280734	1	0.000e+00
TPV-DO_00285_VS_TPV-SL_00302	-1495.421217	1.0371	185.6	612.4	0.1274	0.1334	1.0465		-1540.737428	0.7586	192.0	606.0	1.0000	0.2529	0.2529		90.632422	1	0.000e+00
TPV-DO_00286_VS_TPV-SL_00303	-1264.880750	0.7960	151.7	538.3	0.0742	0.0708	0.9551		-1332.414391	0.5831	166.8	523.2	1.0000	0.1944	0.1944		135.067282	1	0.000e+00
TPV-DO_00287_VS_TPV-SL_00304	-326.963007	0.8610	42.0	159.0	0.0486	0.0564	1.1607		-344.894336	0.5129	42.2	158.8	1.0000	0.1710	0.1710		35.862658	1	2.117e-09
TPV-DO_00288_VS_TPV-SL_00305	-3002.001484	2.8004	308.6	1383.4	0.0330	0.1471	4.4586		-3142.466640	0.8006	305.7	1386.3	1.0000	0.2669	0.2669		280.930312	1	0.000e+00
TPV-DO_00289_VS_TPV-SL_00306	-4232.703743	1.4433	434.9	1815.1	0.0632	0.1244	1.9697		-4444.020763	0.7614	432.2	1817.8	1.0000	0.2538	0.2538		422.63404	1	0.000e+00
TPV-DO_00290_VS_TPV-SL_00307	-1982.630089	50.0000	184.7	742.3	0.0044	0.3636	82.1961		-2051.561118	1.8774	194.0	733.0	1.0000	0.6258	0.6258		137.862058	1	0.000e+00
TPV-DO_00291_VS_TPV-SL_00310	-2217.836969	8.1932	212.2	810.8	0.0306	0.3606	11.7878		-2284.968226	1.8709	226.6	796.4	1.0000	0.6236	0.6236		134.262514	1	0.000e+00
TPV-DO_00292_VS_TPV-SL_00311	-6600.433227	1.3503	777.2	3356.8	0.0189	0.0418	2.2137		-7205.989323	0.5053	813.2	3320.8	1.0000	0.1684	0.1684		1211.112192	1	0.000e+00
TPV-DO_00293_VS_TPV-SL_00312	-2113.703556	1.1034	230.6	876.4	0.0905	0.1189	1.3139		-2219.023335	0.7631	233.6	873.4	1.0000	0.2544	0.2544		210.639558	1	0.000e+00
TPV-DO_00294_VS_TPV-SL_00313	-3162.679273	0.9489	365.3	1482.7	0.0351	0.0491	1.4007		-3407.013178	0.5209	364.2	1483.8	1.0000	0.1736	0.1736		488.66781	1	0.000e+00
TPV-DO_00296_VS_TPV-SL_00314	-869.136049	4.6726	81.2	344.8	0.0406	0.2827	6.9673		-910.509536	1.4680	79.7	346.3	1.0000	0.4893	0.4893		82.746974	1	0.000e+00
TPV-DO_00297_VS_TPV-SL_00315	-1547.472533	1.7406	155.1	699.9	0.0376	0.1029	2.7340		-1660.203938	0.7633	157.0	698.0	1.0000	0.2544	0.2544		225.46281	1	0.000e+00
TPV-DO_00302_VS_TPV-SL_00320	-2049.224293	1.4288	242.7	915.3	0.0475	0.0916	1.9271		-2183.575511	0.7131	246.8	911.2	1.0000	0.2377	0.2377		268.702436	1	0.000e+00
TPV-DO_00303_VS_TPV-SL_00321	-2648.420945	1.8170	279.4	1076.6	0.0685	0.1593	2.3255		-2770.945972	0.9533	301.0	1055.0	1.0000	0.3178	0.3178		245.050054	1	0.000e+00
TPV-DO_00304_VS_TPV-SL_00322	-812.646364	0.6194	109.3	373.7	0.1021	0.0690	0.6762		-844.729508	0.5098	116.6	366.4	1.0000	0.1699	0.1699		64.166288	1	1.110e-15
TPV-DO_00305_VS_TPV-SL_00323	-2301.173975	1.0921	267.8	1061.2	0.0505	0.0760	1.5050		-2445.722639	0.6103	268.3	1060.7	1.0000	0.2034	0.2034		289.097328	1	0.000e+00
TPV-DO_00306_VS_TPV-SL_00324	-674.513500	1.3218	74.3	300.7	0.0681	0.1188	1.7432		-706.042196	0.7320	79.9	295.1	1.0000	0.2440	0.2440		63.057392	1	1.998e-15
TPV-DO_00307_VS_TPV-SL_00326	-1517.778676	2.7632	137.0	610.0	0.0559	0.2249	4.0203		-1577.009074	1.1591	137.8	609.2	1.0000	0.3864	0.3864		118.460796	1	0.000e+00
TPV-DO_00313_VS_TPV-SL_00332	-1995.261049	1.7111	230.0	898.0	0.0342	0.0845	2.4671		-2147.123389	0.7178	239.3	888.7	1.0000	0.2393	0.2393		303.72468	1	0.000e+00
TPV-DO_00315_VS_TPV-SL_00333	-779.238524	5.3095	59.9	315.1	0.0384	0.3535	9.2166		-806.309522	1.7177	62.2	312.8	1.0000	0.5726	0.5726		54.141996	1	1.865e-13
TPV-DO_00316_VS_TPV-SL_00334	-4911.528273	1.8647	544.0	2159.0	0.0446	0.1170	2.6245		-5189.096877	0.7894	552.3	2150.7	1.0000	0.2631	0.2631		555.137208	1	0.000e+00
TPV-DO_00317_VS_TPV-SL_00335	-402.897280	4.3584	46.4	151.6	0.1098	0.5012	4.5640		-408.253794	4.0391	56.3	141.7	1.0000	1.3464	1.3464		10.713028	1	1.064e-03
TPV-DO_00322_VS_TPV-SL_00341	-2549.415116	1.1756	253.3	1141.7	0.0590	0.1006	1.7045		-2698.873195	0.7109	265.3	1129.7	1.0000	0.2370	0.2370		298.916158	1	0.000e+00
TPV-DO_00323_VS_TPV-SL_00342	-794.309163	2.2312	68.0	367.0	0.0328	0.1324	4.0402		-844.933136	0.8109	71.4	363.6	1.0000	0.2703	0.2703		101.247946	1	0.000e+00
TPV-DO_00329_VS_TPV-SL_00350	-2040.429801	3.8829	192.8	866.2	0.0265	0.1685	6.3532		-2150.789234	1.0669	208.7	850.3	1.0000	0.3556	0.3556		220.718866	1	0.000e+00
TPV-DO_00330_VS_TPV-SL_00351	-1844.246281	1.6886	186.6	800.4	0.0518	0.1262	2.4363		-1944.036868	0.7998	188.1	798.9	1.0000	0.2666	0.2666		199.581174	1	0.000e+00
TPV-DO_00331_VS_TPV-SL_00352	-389.627979	3.6184	43.4	181.6	0.0207	0.1193	5.7523		-415.395925	0.7643	41.9	183.1	1.0000	0.2548	0.2548		51.535892	1	7.030e-13
TPV-DO_00332_VS_TPV-SL_00353	-904.525951	3.8747	88.7	358.3	0.0419	0.2334	5.5654		-952.588470	1.5266	97.6	349.4	1.0000	0.5089	0.5089		96.125038	1	0.000e+00
TPV-DO_00333_VS_TPV-SL_00354	-1965.115196	3.0314	185.0	859.0	0.0288	0.1446	5.0308		-2112.148216	1.0653	203.4	840.6	1.0000	0.3551	0.3551		294.06604	1	0.000e+00
TPV-DO_00334_VS_TPV-SL_00355	-1894.241197	1.0004	179.9	900.1	0.0576	0.0895	1.5538		-2007.406273	0.6126	182.5	897.5	1.0000	0.2042	0.2042		226.330152	1	0.000e+00
TPV-DO_00335_VS_TPV-SL_00356	-575.973276	1.3988	50.5	291.5	0.0256	0.0703	2.7500		-613.313433	0.5025	51.1	290.9	1.0000	0.1675	0.1675		74.680314	1	0.000e+00
TPV-DO_00340_VS_TPV-SL_00361	-1298.635535	5.0058	137.2	588.8	0.0108	0.0915	8.4372		-1415.153390	0.7576	138.6	587.4	1.0000	0.2525	0.2525		233.03571	1	0.000e+00
TPV-DO_00341_VS_TPV-SL_00362	-2246.956000	1.1140	251.5	996.5	0.0927	0.1250	1.3476		-2329.551100	0.7331	263.9	984.1	1.0000	0.2444	0.2444		165.1902	1	0.000e+00
TPV-DO_00342_VS_TPV-SL_00363	-797.576318	1.4131	84.4	386.6	0.0257	0.0604	2.3519		-868.087830	0.6102	84.0	387.0	1.0000	0.2034	0.2034		141.023024	1	0.000e+00
TPV-DO_00344_VS_TPV-SL_00365	-1844.624285	1.3445	249.8	869.2	0.0368	0.0655	1.7801		-1968.651101	0.5714	264.6	854.4	1.0000	0.1905	0.1905		248.053632	1	0.000e+00
TPV-DO_00345_VS_TPV-SL_00366	-1946.479525	3.4022	204.2	770.8	0.0318	0.1536	4.8356		-2090.158822	1.1117	208.7	766.3	1.0000	0.3706	0.3706		287.358594	1	0.000e+00
TPV-DO_00346_VS_TPV-SL_00367	-7622.933386	1.0468	800.0	3505.0	0.0463	0.0723	1.5610		-8149.814007	0.6129	815.2	3489.8	1.0000	0.2043	0.2043		1053.761242	1	0.000e+00
TPV-DO_00347_VS_TPV-SL_00368	-1126.951695	1.3655	121.5	484.5	0.0681	0.1216	1.7854		-1186.836016	0.8022	123.6	482.4	1.0000	0.2674	0.2674		119.768642	1	0.000e+00
TPV-DO_00348_VS_TPV-SL_00369	-3390.251448	1.0592	373.2	1654.8	0.0206	0.0361	1.7586		-3722.689213	0.5261	403.1	1624.9	1.0000	0.1754	0.1754		664.87553	1	0.000e+00
TPV-DO_00350_VS_TPV-SL_00372	-1054.398056	1.9978	104.6	486.4	0.0325	0.1062	3.2686		-1127.710397	0.7679	107.9	483.1	1.0000	0.2560	0.2560		146.624682	1	0.000e+00
TPV-DO_00351_VS_TPV-SL_00373	-8865.197819	1.5426	975.8	3788.2	0.0688	0.1364	1.9811		-9293.817293	0.8506	982.3	3781.7	1.0000	0.2835	0.2835		857.238948	1	0.000e+00
TPV-DO_00352_VS_TPV-SL_00374	-2663.579475	1.6049	302.3	1122.7	0.0623	0.1276	2.0478		-2784.687609	0.8237	330.8	1094.2	1.0000	0.2746	0.2746		242.216268	1	0.000e+00
TPV-DO_00353_VS_TPV-SL_00375	-367.937127	5.6088	41.0	148.0	0.0316	0.2441	7.7346		-383.113138	1.2705	40.7	148.3	1.0000	0.4235	0.4235		30.352022	1	3.603e-08
TPV-DO_00355_VS_TPV-SL_00377	-556.666356	9.3998	39.9	272.1	0.0057	0.1346	23.6022		-611.306115	0.9819	40.6	271.4	1.0000	0.3273	0.3273		109.279518	1	0.000e+00
TPV-DO_00356_VS_TPV-SL_00378	-879.807811	1.9470	89.5	345.5	0.1096	0.2431	2.2169		-900.647336	1.1791	95.0	340.0	1.0000	0.3930	0.3930		41.67905	1	1.076e-10
TPV-DO_00357_VS_TPV-SL_00379	-1603.943577	1.1734	185.6	726.4	0.0381	0.0637	1.6729		-1729.902534	0.5981	190.6	721.4	1.0000	0.1994	0.1994		251.917914	1	0.000e+00
TPV-DO_00358_VS_TPV-SL_00380	-1670.890351	3.0203	160.5	697.5	0.0310	0.1470	4.7437		-1781.042100	0.9997	162.6	695.4	1.0000	0.3332	0.3332		220.303498	1	0.000e+00
TPV-DO_00359_VS_TPV-SL_00381	-1502.452263	1.6967	148.8	679.2	0.0482	0.1242	2.5796		-1592.997412	0.7976	146.6	681.4	1.0000	0.2659	0.2659		181.090298	1	0.000e+00
TPV-DO_00360_VS_TPV-SL_00382	-1368.969288	1.0781	128.8	636.2	0.0556	0.0931	1.6748		-1453.627160	0.6425	131.9	633.1	1.0000	0.2142	0.2142		169.315744	1	0.000e+00
TPV-DO_00361_VS_TPV-SL_00384	-1090.231246	1.2738	117.5	536.5	0.0219	0.0471	2.1477		-1194.610427	0.5630	129.0	525.0	1.0000	0.1877	0.1877		208.758362	1	0.000e+00
TPV-DO_00362_VS_TPV-SL_00385	-1429.083102	1.9260	168.1	647.9	0.0266	0.0753	2.8258		-1543.046511	0.6630	172.5	643.5	1.0000	0.2210	0.2210		227.926818	1	0.000e+00
TPV-DO_00363_VS_TPV-SL_00386	-2268.663970	0.8762	296.4	1158.6	0.0196	0.0261	1.3319		-2462.870562	0.4162	315.8	1139.2	1.0000	0.1387	0.1387		388.413184	1	0.000e+00
TPV-DO_00364_VS_TPV-SL_00387	-2604.699452	0.9009	270.2	1220.8	0.0403	0.0565	1.4019		-2799.240383	0.5364	273.0	1218.0	1.0000	0.1788	0.1788		389.081862	1	0.000e+00
TPV-DO_00366_VS_TPV-SL_00389	-2665.661945	5.9495	257.7	1065.3	0.0274	0.2502	9.1472		-2774.769500	1.2635	265.1	1057.9	1.0000	0.4212	0.4212		218.21511	1	0.000e+00
TPV-DO_00368_VS_TPV-SL_00390	-2769.178230	6.5895	264.4	1046.6	0.0413	0.3870	9.3599		-2847.274558	1.8764	274.0	1037.0	1.0000	0.6255	0.6255		156.192656	1	0.000e+00
TPV-DO_00369_VS_TPV-SL_00391	-1218.811345	2.7124	85.5	517.5	0.0601	0.2808	4.6751		-1261.550050	1.3284	85.8	517.2	1.0000	0.4428	0.4428		85.47741	1	0.000e+00
TPV-DO_00370_VS_TPV-SL_00392	-2878.768641	1.7700	300.7	1241.3	0.0270	0.0736	2.7223		-3170.414939	0.8034	321.6	1220.4	1.0000	0.2678	0.2678		583.292596	1	0.000e+00
TPV-DO_00371_VS_TPV-SL_00393	-2017.412338	2.2266	183.7	893.3	0.0434	0.1559	3.5930		-2127.473169	0.9137	184.8	892.2	1.0000	0.3046	0.3046		220.121662	1	0.000e+00
TPV-DO_00372_VS_TPV-SL_00394	-3179.272726	3.4724	299.2	1317.8	0.0417	0.2202	5.2853		-3331.478305	1.2589	318.9	1298.1	1.0000	0.4196	0.4196		304.411158	1	0.000e+00
TPV-DO_00373_VS_TPV-SL_00395	-1982.722968	1.6444	218.5	972.5	0.0213	0.0581	2.7295		-2159.938212	0.5621	222.8	968.2	1.0000	0.1874	0.1874		354.430488	1	0.000e+00
TPV-DO_00374_VS_TPV-SL_00396	-1032.306030	4.0451	124.5	412.5	0.0393	0.2020	5.1445		-1071.547590	1.0576	123.2	413.8	1.0000	0.3525	0.3525		78.48312	1	0.000e+00
TPV-DO_00375_VS_TPV-SL_00397	-2147.182883	1.0227	207.9	1022.1	0.0379	0.0644	1.7001		-2331.699933	0.6255	207.6	1022.4	1.0000	0.2085	0.2085		369.0341	1	0.000e+00
TPV-DO_00376_VS_TPV-SL_00398	-3338.535295	1.9213	401.0	1573.0	0.0254	0.0728	2.8669		-3594.058041	0.6355	410.0	1564.0	1.0000	0.2118	0.2118		511.045492	1	0.000e+00
TPV-DO_00377_VS_TPV-SL_00399	-1403.499903	0.6733	151.3	751.7	0.0293	0.0342	1.1693		-1502.394527	0.3703	163.6	739.4	1.0000	0.1234	0.1234		197.789248	1	0.000e+00
TPV-DO_00378_VS_TPV-SL_00400	-2407.991179	0.9150	310.2	1201.8	0.0232	0.0317	1.3638		-2604.425367	0.4384	338.0	1174.0	1.0000	0.1461	0.1461		392.868376	1	0.000e+00
TPV-DO_00379_VS_TPV-SL_00401	-2542.882969	1.3607	284.8	1125.2	0.0525	0.0976	1.8602		-2709.159472	0.7381	289.5	1120.5	1.0000	0.2460	0.2460		332.553006	1	0.000e+00
TPV-DO_00380_VS_TPV-SL_00402	-1410.617731	1.1941	142.9	655.1	0.0599	0.1044	1.7435		-1483.944875	0.6700	152.7	645.3	1.0000	0.2233	0.2233		146.654288	1	0.000e+00
TPV-DO_00381_VS_TPV-SL_00403	-2368.847258	1.0128	324.5	1169.5	0.0169	0.0248	1.4649		-2588.907239	0.4361	330.5	1163.5	1.0000	0.1454	0.1454		440.119962	1	0.000e+00
TPV-DO_00382_VS_TPV-SL_00404	-1701.268700	2.0954	156.9	683.1	0.0628	0.1844	2.9370		-1784.603926	1.0754	156.0	684.0	1.0000	0.3585	0.3585		166.670452	1	0.000e+00
TPV-DO_00383_VS_TPV-SL_00405	-1188.597432	1.3070	116.3	516.7	0.0851	0.1464	1.7206		-1241.309788	0.8882	125.8	507.2	1.0000	0.2961	0.2961		105.424712	1	0.000e+00
TPV-DO_00384_VS_TPV-SL_00406	-3771.459121	1.5068	487.0	1871.0	0.0126	0.0293	2.3192		-4140.690493	0.4661	531.8	1826.2	1.0000	0.1554	0.1554		738.462744	1	0.000e+00
TPV-DO_00385_VS_TPV-SL_00407	-3218.113586	0.9815	345.3	1412.7	0.0668	0.0874	1.3081		-3408.193331	0.6684	350.5	1407.5	1.0000	0.2228	0.2228		380.15949	1	0.000e+00
TPV-DO_00386_VS_TPV-SL_00410	-3464.686259	0.9633	411.0	1746.0	0.0182	0.0285	1.5641		-3765.382484	0.4447	467.6	1689.4	1.0000	0.1482	0.1482		601.39245	1	0.000e+00
TPV-DO_00387_VS_TPV-SL_00411	-3424.879923	1.2117	348.1	1433.9	0.1158	0.1621	1.3998		-3534.184912	0.8444	358.5	1423.5	1.0000	0.2815	0.2815		218.609978	1	0.000e+00
TPV-DO_00388_VS_TPV-SL_00412	-1876.421446	0.9221	204.2	800.8	0.1149	0.1198	1.0431		-1941.473584	0.6778	215.8	789.2	1.0000	0.2259	0.2259		130.104276	1	0.000e+00
TPV-DO_00389_VS_TPV-SL_00413	-796.568493	0.5555	116.0	376.0	0.0788	0.0493	0.6255		-831.717137	0.4406	116.3	375.7	1.0000	0.1469	0.1469		70.297288	1	0.000e+00
TPV-DO_00390_VS_TPV-SL_00414	-2540.624436	0.9763	275.2	1134.8	0.0702	0.0907	1.2931		-2669.164114	0.6515	296.5	1113.5	1.0000	0.2172	0.2172		257.079356	1	0.000e+00
TPV-DO_00391_VS_TPV-SL_00415	-8775.649837	1.3260	872.8	3771.2	0.0789	0.1384	1.7537		-9146.183072	0.8068	938.9	3705.1	1.0000	0.2689	0.2689		741.06647	1	0.000e+00
TPV-DO_00392_VS_TPV-SL_00416	-5001.131197	1.6299	557.4	2238.6	0.0430	0.1000	2.3237		-5294.509017	0.7295	599.6	2196.4	1.0000	0.2432	0.2432		586.75564	1	0.000e+00
TPV-DO_00393_VS_TPV-SL_00417	-461.625325	4.2414	39.0	189.0	0.0382	0.2667	6.9775		-481.198873	1.3451	41.1	186.9	1.0000	0.4484	0.4484		39.147096	1	3.930e-10
TPV-DO_00394_VS_TPV-SL_00418	-3268.504130	2.0815	405.4	1517.6	0.0225	0.0683	3.0354		-3524.173880	0.6122	417.0	1506.0	1.0000	0.2041	0.2041		511.3395	1	0.000e+00
TPV-DO_00395_VS_TPV-SL_00419	-2892.574276	1.2193	282.7	1442.3	0.0363	0.0760	2.0921		-3068.219084	0.5834	331.2	1393.8	1.0000	0.1945	0.1945		351.289616	1	0.000e+00
TPV-DO_00398_VS_TPV-SL_00420	-3213.973049	0.9760	385.8	1453.2	0.0646	0.0805	1.2476		-3380.407950	0.5927	388.2	1450.8	1.0000	0.1976	0.1976		332.869802	1	0.000e+00
TPV-DO_00399_VS_TPV-SL_00421	-1213.322349	1.4052	158.9	519.1	0.1333	0.1856	1.3922		-1239.664980	0.9282	159.9	518.1	1.0000	0.3094	0.3094		52.685262	1	3.915e-13
TPV-DO_00400_VS_TPV-SL_00422	-354.113807	0.6471	48.5	149.5	0.1401	0.0862	0.6150		-362.180645	0.5315	48.5	149.5	1.0000	0.1772	0.1772		16.133676	1	5.903e-05
TPV-DO_00401_VS_TPV-SL_00423	-958.859926	1.0310	111.7	461.3	0.0386	0.0587	1.5210		-1024.531155	0.5490	122.8	450.2	1.0000	0.1830	0.1830		131.342458	1	0.000e+00
TPV-DO_00402_VS_TPV-SL_00424	-3091.160055	0.9948	421.6	1435.4	0.0517	0.0642	1.2422		-3252.223561	0.5314	452.4	1404.6	1.0000	0.1771	0.1771		322.127012	1	0.000e+00
TPV-DO_00403_VS_TPV-SL_00425	-534.574953	0.4894	71.4	240.6	0.0769	0.0435	0.5661		-556.796229	0.3714	74.4	237.6	1.0000	0.1238	0.1238		44.442552	1	2.619e-11
TPV-DO_00404_VS_TPV-SL_00426	-647.281200	0.6744	71.9	330.1	0.0382	0.0408	1.0690		-688.183133	0.3866	72.2	329.8	1.0000	0.1289	0.1289		81.803866	1	0.000e+00
TPV-DO_00405_VS_TPV-SL_00427	-703.606888	1.3710	76.1	322.9	0.0488	0.0969	1.9843		-753.071107	0.7227	76.6	322.4	1.0000	0.2409	0.2409		98.928438	1	0.000e+00
TPV-DO_00406_VS_TPV-SL_00428	-675.071306	1.2976	82.7	316.3	0.0361	0.0661	1.8331		-727.109923	0.6300	82.6	316.4	1.0000	0.2100	0.2100		104.077234	1	0.000e+00
TPV-DO_00407_VS_TPV-SL_00429	-1110.238898	1.4923	116.8	447.2	0.0953	0.1677	1.7599		-1155.056239	0.9750	117.3	446.7	1.0000	0.3250	0.3250		89.634682	1	0.000e+00
TPV-DO_00408_VS_TPV-SL_00430	-1306.467070	0.8220	144.4	575.6	0.0843	0.0862	1.0227		-1369.610100	0.6059	155.0	565.0	1.0000	0.2020	0.2020		126.28606	1	0.000e+00
TPV-DO_00409_VS_TPV-SL_00431	-4050.867905	0.9006	518.3	1899.7	0.0413	0.0503	1.2163		-4320.939741	0.5136	545.1	1872.9	1.0000	0.1712	0.1712		540.143672	1	0.000e+00
TPV-DO_00410_VS_TPV-SL_00433	-1755.255894	2.2964	147.9	716.1	0.0511	0.1832	3.5851		-1845.532308	1.0611	146.6	717.4	1.0000	0.3537	0.3537		180.552828	1	0.000e+00
TPV-DO_00411_VS_TPV-SL_00434	-5734.866196	1.3777	580.1	2455.9	0.0707	0.1308	1.8496		-6051.226931	0.8554	578.7	2457.3	1.0000	0.2851	0.2851		632.72147	1	0.000e+00
TPV-DO_00412_VS_TPV-SL_00435	-1719.491375	0.9071	218.4	894.6	0.0093	0.0138	1.4844		-1906.735644	0.3955	223.3	889.7	1.0000	0.1318	0.1318		374.488538	1	0.000e+00
TPV-DO_00413_VS_TPV-SL_00436	-3197.667010	2.2047	301.1	1324.9	0.0562	0.1789	3.1811		-3349.430178	1.0156	314.4	1311.6	1.0000	0.3385	0.3385		303.526336	1	0.000e+00
TPV-DO_00414_VS_TPV-SL_00437	-1438.928819	1.9628	170.1	690.9	0.0190	0.0585	3.0733		-1572.829648	0.6260	174.0	687.0	1.0000	0.2087	0.2087		267.801658	1	0.000e+00
TPV-DO_00415_VS_TPV-SL_00438	-982.509231	0.9909	96.2	431.8	0.0588	0.0843	1.4343		-1039.783936	0.6368	97.7	430.3	1.0000	0.2123	0.2123		114.54941	1	0.000e+00
TPV-DO_00416_VS_TPV-SL_00440	-1086.627068	1.4200	113.7	522.3	0.0187	0.0455	2.4386		-1207.529644	0.6182	118.5	517.5	1.0000	0.2061	0.2061		241.805152	1	0.000e+00
TPV-DO_00417_VS_TPV-SL_00441	-1313.310124	1.1912	159.5	611.5	0.0252	0.0442	1.7503		-1431.409238	0.5262	160.2	610.8	1.0000	0.1754	0.1754		236.198228	1	0.000e+00
TPV-DO_00418_VS_TPV-SL_00442	-2688.833975	1.6389	281.3	1149.7	0.0570	0.1285	2.2537		-2837.453323	0.8349	292.3	1138.7	1.0000	0.2783	0.2783		297.238696	1	0.000e+00
TPV-DO_00420_VS_TPV-SL_00443	-2528.479834	1.1325	295.0	1343.0	0.0072	0.0145	2.0297		-2840.501630	0.3976	292.3	1345.7	1.0000	0.1325	0.1325		624.043592	1	0.000e+00
TPV-DO_00421_VS_TPV-SL_00444	-1486.340028	50.0000	117.8	530.2	0.0063	0.5576	89.1648		-1529.557858	2.7253	120.5	527.5	1.0000	0.9084	0.9084		86.43566	1	0.000e+00
TPV-DO_00422_VS_TPV-SL_00445	-1361.788959	16.6233	101.6	597.4	0.0065	0.2403	36.6991		-1426.141257	1.2534	101.1	597.9	1.0000	0.4178	0.4178		128.704596	1	0.000e+00
TPV-DO_00423_VS_TPV-SL_00447	-2500.286179	1.0039	269.6	1227.4	0.0441	0.0682	1.5474		-2649.583673	0.5212	290.4	1206.6	1.0000	0.1737	0.1737		298.594988	1	0.000e+00
TPV-DO_00424_VS_TPV-SL_00448	-4259.927241	1.0556	439.6	2023.4	0.0438	0.0718	1.6409		-4547.612700	0.5881	452.9	2010.1	1.0000	0.1960	0.1960		575.370918	1	0.000e+00
TPV-DO_00425_VS_TPV-SL_00451	-4084.294729	2.0600	391.4	1831.6	0.0407	0.1333	3.2760		-4315.924838	0.8236	414.0	1809.0	1.0000	0.2745	0.2745		463.260218	1	0.000e+00
TPV-DO_00426_VS_TPV-SL_00452	-1352.114282	1.8911	153.6	590.4	0.0548	0.1381	2.5219		-1421.735724	0.8440	152.8	591.2	1.0000	0.2813	0.2813		139.242884	1	0.000e+00
TPV-DO_00427_VS_TPV-SL_00453	-2092.686015	1.2971	240.5	956.5	0.0594	0.1035	1.7405		-2193.342591	0.6657	249.1	947.9	1.0000	0.2219	0.2219		201.313152	1	0.000e+00
TPV-DO_00428_VS_TPV-SL_00454	-1042.390661	2.7580	110.4	435.6	0.0453	0.1747	3.8581		-1086.371113	0.9649	108.2	437.8	1.0000	0.3216	0.3216		87.960904	1	0.000e+00
TPV-DO_00429_VS_TPV-SL_00455	-17352.299935	1.3624	1704.0	7407.0	0.0696	0.1298	1.8639		-18239.381116	0.8201	1746.2	7364.8	1.0000	0.2734	0.2734		1774.162362	1	0.000e+00
TPV-DO_00430_VS_TPV-SL_00456	-909.843671	0.9802	106.5	421.5	0.0418	0.0581	1.3902		-980.310489	0.5641	106.1	421.9	1.0000	0.1880	0.1880		140.933636	1	0.000e+00
TPV-DO_00431_VS_TPV-SL_00457	-1481.530539	0.9987	162.2	731.8	0.0214	0.0359	1.6728		-1625.783732	0.5001	164.4	729.6	1.0000	0.1667	0.1667		288.506386	1	0.000e+00
TPV-DO_00432_VS_TPV-SL_00458	-1372.766775	0.8490	153.7	641.3	0.0410	0.0513	1.2500		-1469.212980	0.5102	161.3	633.7	1.0000	0.1701	0.1701		192.89241	1	0.000e+00
TPV-DO_00433_VS_TPV-SL_00459	-1211.545388	1.1083	108.3	599.7	0.0339	0.0690	2.0339		-1302.475875	0.5676	115.0	593.0	1.0000	0.1892	0.1892		181.860974	1	0.000e+00
TPV-DO_00434_VS_TPV-SL_00460	-948.055728	4.3187	100.0	404.0	0.0239	0.1582	6.6139		-1013.632465	1.1397	114.4	389.6	1.0000	0.3799	0.3799		131.153474	1	0.000e+00
TPV-DO_00435_VS_TPV-SL_00461	-2374.429211	0.8254	272.1	1200.9	0.0188	0.0259	1.3755		-2596.088248	0.4284	285.1	1187.9	1.0000	0.1428	0.1428		443.318074	1	0.000e+00
TPV-DO_00436_VS_TPV-SL_00463	-875.157306	0.9430	101.0	403.0	0.0527	0.0683	1.2954		-922.421720	0.5165	105.2	398.8	1.0000	0.1722	0.1722		94.528828	1	0.000e+00
TPV-DO_00437_VS_TPV-SL_00464	-2274.202371	2.3414	223.2	994.8	0.0397	0.1437	3.6186		-2389.009096	0.8899	239.1	978.9	1.0000	0.2966	0.2966		229.61345	1	0.000e+00
TPV-DO_00438_VS_TPV-SL_00465	-791.412521	0.7276	97.1	388.9	0.0429	0.0444	1.0359		-842.445976	0.4488	99.0	387.0	1.0000	0.1496	0.1496		102.06691	1	0.000e+00
TPV-DO_00439_VS_TPV-SL_00466	-2869.717959	1.5023	295.1	1273.9	0.0383	0.0874	2.2847		-3084.005871	0.7047	297.3	1271.7	1.0000	0.2349	0.2349		428.575824	1	0.000e+00
TPV-DO_00440_VS_TPV-SL_00533	-881.573094	50.0000	71.5	297.5	0.0086	0.7141	83.0798		-905.343304	4.1230	74.1	294.9	1.0000	1.3743	1.3743		47.54042	1	5.388e-12
TPV-DO_00441_VS_TPV-SL_00467	-2313.009093	50.0000	198.4	950.6	0.0021	0.2005	95.5857		-2469.663009	1.2989	212.8	936.2	1.0000	0.4330	0.4330		313.307832	1	0.000e+00
TPV-DO_00442_VS_TPV-SL_00468	-3114.758342	0.7652	360.6	1550.4	0.0279	0.0337	1.2070		-3357.515762	0.4248	366.9	1544.1	1.0000	0.1416	0.1416		485.51484	1	0.000e+00
TPV-DO_00444_VS_TPV-SL_00470	-9150.852127	50.0000	816.8	3563.2	0.0025	0.2214	88.4072		-9704.834793	1.4246	816.5	3563.5	1.0000	0.4749	0.4749		1107.965332	1	0.000e+00
TPV-DO_00445_VS_TPV-SL_00472	-1307.355151	1.1291	156.2	674.8	0.0183	0.0339	1.8552		-1428.705042	0.4850	179.9	651.1	1.0000	0.1617	0.1617		242.699782	1	0.000e+00
TPV-DO_00446_VS_TPV-SL_00473	-2009.073422	1.7792	274.8	922.2	0.0357	0.0823	2.3074		-2141.938116	0.6547	277.1	919.9	1.0000	0.2182	0.2182		265.729388	1	0.000e+00
TPV-DO_00447_VS_TPV-SL_00474	-814.768364	5.6780	115.5	406.5	0.0050	0.0423	8.4085		-903.859570	0.5261	108.4	413.6	1.0000	0.1754	0.1754		178.182412	1	0.000e+00
TPV-DO_00448_VS_TPV-SL_00475	-922.880975	1.9555	86.4	360.6	0.1087	0.2522	2.3203		-949.197148	1.2523	90.6	356.4	1.0000	0.4174	0.4174		52.632346	1	4.022e-13
TPV-DO_00449_VS_TPV-SL_00476	-1028.620194	1.2519	103.7	475.3	0.0464	0.0891	1.9216		-1090.236590	0.6526	109.5	469.5	1.0000	0.2175	0.2175		123.232792	1	0.000e+00
TPV-DO_00450_VS_TPV-SL_00477	-1346.233382	0.4455	147.7	734.3	0.0132	0.0110	0.8318		-1460.448871	0.2877	154.8	727.2	1.0000	0.0959	0.0959		228.430978	1	0.000e+00
TPV-DO_00451_VS_TPV-SL_00478	-1509.420155	0.6740	207.9	740.1	0.0414	0.0370	0.8929		-1593.361411	0.4018	235.1	712.9	1.0000	0.1339	0.1339		167.882512	1	0.000e+00
TPV-DO_00453_VS_TPV-SL_00480	-777.170818	15.3739	62.3	300.7	0.0135	0.3779	28.0536		-805.996559	1.8487	64.3	298.7	1.0000	0.6162	0.6162		57.651482	1	3.131e-14
TPV-DO_00454_VS_TPV-SL_00481	-1345.912892	0.6761	137.5	678.5	0.0384	0.0432	1.1247		-1436.590359	0.4200	143.3	672.7	1.0000	0.1400	0.1400		181.354934	1	0.000e+00
TPV-DO_00455_VS_TPV-SL_00482	-331.097179	0.7767	44.6	165.4	0.0403	0.0427	1.0606		-349.238004	0.4305	44.9	165.1	1.0000	0.1435	0.1435		36.28165	1	1.708e-09
TPV-DO_00456_VS_TPV-SL_00483	-347.851813	0.4800	36.0	171.0	0.1010	0.0628	0.6218		-359.736980	0.3957	36.5	170.5	1.0000	0.1319	0.1319		23.770334	1	1.085e-06
TPV-DO_00457_VS_TPV-SL_00484	-370.287914	0.7917	48.3	173.7	0.0962	0.0867	0.9017		-379.406898	0.4723	58.0	164.0	1.0000	0.1574	0.1574		18.237968	1	1.950e-05
TPV-DO_00458_VS_TPV-SL_00485	-878.713458	0.8011	96.8	422.2	0.1022	0.1012	0.9906		-907.953528	0.5940	101.1	417.9	1.0000	0.1980	0.1980		58.48014	1	2.054e-14
TPV-DO_00459_VS_TPV-SL_00486	-3264.676572	2.9565	449.0	1513.0	0.0185	0.0749	4.0540		-3522.676445	0.7039	467.9	1494.1	1.0000	0.2346	0.2346		515.999746	1	0.000e+00
TPV-DO_00460_VS_TPV-SL_00487	-2005.787442	1.1936	191.6	912.4	0.0689	0.1189	1.7266		-2100.775125	0.6998	200.2	903.8	1.0000	0.2333	0.2333		189.975366	1	0.000e+00
TPV-DO_00461_VS_TPV-SL_00488	-1939.333650	0.6717	225.7	989.3	0.0257	0.0278	1.0832		-2090.463528	0.3816	244.0	971.0	1.0000	0.1272	0.1272		302.259756	1	0.000e+00
TPV-DO_00462_VS_TPV-SL_00489	-2787.901934	1.4231	298.0	1283.0	0.0702	0.1356	1.9329		-2893.871553	0.7480	311.7	1269.3	1.0000	0.2493	0.2493		211.939238	1	0.000e+00
TPV-DO_00463_VS_TPV-SL_00490	-930.797593	1.3211	127.6	406.4	0.0926	0.1317	1.4232		-958.067941	0.7463	128.3	405.7	1.0000	0.2488	0.2488		54.540696	1	1.522e-13
TPV-DO_00465_VS_TPV-SL_00492	-2189.386030	1.6144	229.2	928.8	0.0812	0.1660	2.0458		-2274.339243	0.9474	246.4	911.6	1.0000	0.3158	0.3158		169.906426	1	0.000e+00
TPV-DO_00466_VS_TPV-SL_00493	-529.050162	1.2129	59.8	213.2	0.0920	0.1278	1.3892		-555.610847	0.8372	61.3	211.7	1.0000	0.2791	0.2791		53.12137	1	3.135e-13
TPV-DO_00468_VS_TPV-SL_00496	-2094.193892	1.8925	216.5	863.5	0.0825	0.1953	2.3684		-2160.471972	1.0057	223.5	856.5	1.0000	0.3352	0.3352		132.55616	1	0.000e+00
TPV-DO_00469_VS_TPV-SL_00497	-1417.687785	1.3748	158.3	699.7	0.0126	0.0297	2.3526		-1577.292130	0.5133	167.4	690.6	1.0000	0.1711	0.1711		319.20869	1	0.000e+00
TPV-DO_00470_VS_TPV-SL_00498	-2810.787830	1.0966	266.3	1341.7	0.0425	0.0773	1.8179		-3008.486080	0.6178	282.5	1325.5	1.0000	0.2059	0.2059		395.3965	1	0.000e+00
TPV-DO_00471_VS_TPV-SL_00499	-1955.860323	0.9910	179.8	879.2	0.0976	0.1285	1.3168		-2035.313297	0.7155	183.5	875.5	1.0000	0.2385	0.2385		158.905948	1	0.000e+00
TPV-DO_00472_VS_TPV-SL_00500	-781.630022	2.1137	99.0	339.0	0.0315	0.0887	2.8125		-837.390368	0.7647	100.7	337.3	1.0000	0.2549	0.2549		111.520692	1	0.000e+00
TPV-DO_00474_VS_TPV-SL_00501	-3416.880625	0.8322	459.2	1700.8	0.0258	0.0308	1.1909		-3683.054073	0.4401	504.2	1655.8	1.0000	0.1467	0.1467		532.346896	1	0.000e+00
TPV-DO_00475_VS_TPV-SL_00502	-4051.431309	1.2286	410.0	1888.0	0.0292	0.0591	2.0231		-4416.888341	0.6126	417.3	1880.7	1.0000	0.2042	0.2042		730.914064	1	0.000e+00
TPV-DO_00476_VS_TPV-SL_00503	-1566.272940	1.3157	208.2	673.8	0.0617	0.0956	1.5488		-1643.377730	0.6830	220.8	661.2	1.0000	0.2277	0.2277		154.20958	1	0.000e+00
TPV-DO_00477_VS_TPV-SL_00504	-2463.751645	1.6338	247.8	1066.2	0.0749	0.1636	2.1838		-2565.205008	0.9339	266.0	1048.0	1.0000	0.3113	0.3113		202.906726	1	0.000e+00
TPV-DO_00478_VS_TPV-SL_00505	-1627.666821	0.5844	177.6	905.4	0.0079	0.0090	1.1422		-1799.865770	0.3332	184.1	898.9	1.0000	0.1111	0.1111		344.397898	1	0.000e+00
TPV-DO_00479_VS_TPV-SL_00506	-2483.593634	1.1459	284.2	1131.8	0.0314	0.0532	1.6911		-2693.760014	0.5831	305.4	1110.6	1.0000	0.1944	0.1944		420.33276	1	0.000e+00
TPV-DO_00480_VS_TPV-SL_00507	-1403.108018	1.0071	158.2	684.8	0.0420	0.0636	1.5133		-1488.331726	0.5129	166.4	676.6	1.0000	0.1710	0.1710		170.447416	1	0.000e+00
TPV-DO_00481_VS_TPV-SL_00508	-2170.392108	0.7348	235.2	1075.8	0.0300	0.0360	1.2008		-2338.576872	0.4418	252.0	1059.0	1.0000	0.1473	0.1473		336.369528	1	0.000e+00
TPV-DO_00482_VS_TPV-SL_00509	-1015.242840	2.7057	128.6	480.4	0.0220	0.0867	3.9463		-1087.118654	0.7251	138.7	470.3	1.0000	0.2417	0.2417		143.751628	1	0.000e+00
TPV-DO_00483_VS_TPV-SL_00510	-1241.539049	0.8955	121.5	601.5	0.0545	0.0762	1.3992		-1306.424227	0.5347	135.9	587.1	1.0000	0.1782	0.1782		129.770356	1	0.000e+00
TPV-DO_00484_VS_TPV-SL_00511	-917.874717	1.3321	93.1	383.9	0.0736	0.1285	1.7450		-966.021361	0.8190	93.7	383.3	1.0000	0.2730	0.2730		96.293288	1	0.000e+00
TPV-DO_00485_VS_TPV-SL_00512	-7444.997075	0.9932	746.9	3639.1	0.0389	0.0635	1.6345		-7963.238378	0.5518	810.4	3575.6	1.0000	0.1839	0.1839		1036.482606	1	0.000e+00
TPV-DO_00486_VS_TPV-SL_00513	-297.766824	2.2362	15.6	143.4	0.0386	0.2162	5.5966		-317.467064	1.1310	15.7	143.3	1.0000	0.3770	0.3770		39.40048	1	3.452e-10
TPV-DO_00487_VS_TPV-SL_00514	-1936.817013	0.7776	189.8	935.2	0.0454	0.0570	1.2551		-2069.568631	0.5029	189.9	935.1	1.0000	0.1676	0.1676		265.503236	1	0.000e+00
TPV-DO_00488_VS_TPV-SL_00515	-2442.325437	1.6593	288.3	1106.7	0.0343	0.0811	2.3650		-2604.605382	0.6134	300.2	1094.8	1.0000	0.2045	0.2045		324.55989	1	0.000e+00
TPV-DO_00489_VS_TPV-SL_00516	-926.486674	0.8335	133.2	457.8	0.0157	0.0184	1.1692		-1007.701498	0.4411	151.1	439.9	1.0000	0.1470	0.1470		162.429648	1	0.000e+00
TPV-DO_00490_VS_TPV-SL_00517	-1265.692055	1.1373	141.9	557.1	0.0924	0.1266	1.3702		-1318.811846	0.7703	143.8	555.2	1.0000	0.2568	0.2568		106.239582	1	0.000e+00
TPV-DO_00491_VS_TPV-SL_00518	-9722.933555	1.0966	1182.9	5033.1	0.0127	0.0232	1.8222		-10674.252543	0.4105	1265.3	4950.7	1.0000	0.1368	0.1368		1902.637976	1	0.000e+00
TPV-DO_00493_VS_TPV-SL_00520	-2914.210129	1.7320	325.9	1306.1	0.0400	0.0998	2.4912		-3105.492631	0.7398	328.8	1303.2	1.0000	0.2466	0.2466		382.565004	1	0.000e+00
TPV-DO_00494_VS_TPV-SL_00521	-1345.661394	0.9034	137.6	675.4	0.0405	0.0601	1.4835		-1420.316916	0.4622	155.6	657.4	1.0000	0.1541	0.1541		149.311044	1	0.000e+00
TPV-DO_00495_VS_TPV-SL_00522	-2135.273577	0.8344	216.3	1025.7	0.0319	0.0443	1.3872		-2317.592647	0.5060	216.2	1025.8	1.0000	0.1687	0.1687		364.63814	1	0.000e+00
TPV-DO_00496_VS_TPV-SL_00523	-421.012091	2.3978	56.1	228.9	0.0034	0.0136	4.0060		-460.374559	0.3053	54.5	230.5	1.0000	0.1018	0.1018		78.724936	1	0.000e+00
TPV-DO_00497_VS_TPV-SL_00524	-813.781543	8.6356	135.1	407.9	0.0010	0.0115	11.5317		-887.480413	0.3832	129.1	413.9	1.0000	0.1277	0.1277		147.39774	1	0.000e+00
TPV-DO_00498_VS_TPV-SL_00525	-1591.309751	1.4427	169.4	631.6	0.1686	0.2354	1.3960		-1619.935670	1.0709	173.2	627.8	1.0000	0.3570	0.3570		57.251838	1	3.830e-14
TPV-DO_00499_VS_TPV-SL_00526	-1214.835924	0.5537	153.6	638.4	0.0140	0.0126	0.8992		-1318.996022	0.3182	168.5	623.5	1.0000	0.1061	0.1061		208.320196	1	0.000e+00
TPV-DO_00500_VS_TPV-SL_00527	-621.388892	1.6401	53.1	246.9	0.1037	0.2162	2.0843		-644.997136	1.1542	56.2	243.8	1.0000	0.3847	0.3847		47.216488	1	6.356e-12
TPV-DO_00501_VS_TPV-SL_00528	-407.815099	1.0039	52.1	178.9	0.1033	0.1132	1.0960		-422.028951	0.6826	52.8	178.2	1.0000	0.2275	0.2275		28.427704	1	9.726e-08
TPV-DO_00502_VS_TPV-SL_00529	-1115.464759	1.5946	96.5	464.5	0.0851	0.1867	2.1923		-1158.501153	0.9917	98.9	462.1	1.0000	0.3306	0.3306		86.072788	1	0.000e+00
TPV-DO_00503_VS_TPV-SL_00530	-1612.492223	1.2080	152.9	678.1	0.1177	0.1692	1.4379		-1666.634380	0.9056	162.9	668.1	1.0000	0.3019	0.3019		108.284314	1	0.000e+00
TPV-DO_00505_VS_TPV-SL_00531	-1612.585003	1.2211	215.9	741.1	0.0451	0.0705	1.5624		-1702.529187	0.5727	221.0	736.0	1.0000	0.1909	0.1909		179.888368	1	0.000e+00
TPV-DO_00506_VS_TPV-SL_00532	-1902.681059	1.1480	213.6	905.4	0.0265	0.0477	1.8025		-2062.656490	0.5575	247.6	871.4	1.0000	0.1858	0.1858		319.950862	1	0.000e+00
TPV-DO_00508_VS_TPV-SL_00536	-1421.707498	1.3951	185.0	643.0	0.0392	0.0717	1.8322		-1516.082616	0.5915	192.1	635.9	1.0000	0.1972	0.1972		188.750236	1	0.000e+00
TPV-DO_00509_VS_TPV-SL_00537	-3926.238290	1.3088	446.4	1716.6	0.0583	0.1007	1.7265		-4126.270045	0.6897	469.1	1693.9	1.0000	0.2299	0.2299		400.06351	1	0.000e+00
TPV-DO_00510_VS_TPV-SL_00538	-4680.762195	0.9408	545.9	2220.1	0.0359	0.0498	1.3865		-5009.314156	0.5258	609.5	2156.5	1.0000	0.1753	0.1753		657.103922	1	0.000e+00
TPV-DO_00511_VS_TPV-SL_00539	-1972.532508	1.5121	230.4	852.6	0.0817	0.1487	1.8192		-2045.793266	0.8477	230.0	853.0	1.0000	0.2826	0.2826		146.521516	1	0.000e+00
TPV-DO_00512_VS_TPV-SL_00540	-799.927959	0.7519	109.9	400.1	0.0115	0.0129	1.1164		-872.404465	0.3923	127.4	382.6	1.0000	0.1308	0.1308		144.953012	1	0.000e+00
TPV-DO_00515_VS_TPV-SL_00541	-1749.760237	6.6769	123.6	683.4	0.0323	0.3986	12.3266		-1815.990126	2.0015	129.7	677.3	1.0000	0.6672	0.6672		132.459778	1	0.000e+00
TPV-DO_00516_VS_TPV-SL_00542	-1589.924043	1.3175	161.5	726.5	0.0452	0.0907	2.0065		-1695.929037	0.6559	167.3	720.7	1.0000	0.2186	0.2186		212.009988	1	0.000e+00
TPV-DO_00517_VS_TPV-SL_00543	-1978.693800	1.3531	194.1	837.9	0.0859	0.1502	1.7494		-2063.210691	0.8840	209.0	823.0	1.0000	0.2947	0.2947		169.033782	1	0.000e+00
TPV-DO_00518_VS_TPV-SL_00544	-1749.227056	0.9993	203.9	825.1	0.0409	0.0590	1.4420		-1872.002283	0.5543	219.5	809.5	1.0000	0.1848	0.1848		245.550454	1	0.000e+00
TPV-DO_00519_VS_TPV-SL_00545	-2759.266073	1.0154	310.1	1378.9	0.0180	0.0308	1.7067		-3052.827722	0.4970	322.1	1366.9	1.0000	0.1657	0.1657		587.123298	1	0.000e+00
TPV-DO_00520_VS_TPV-SL_00546	-3896.019395	0.9884	404.2	1839.8	0.0509	0.0755	1.4854		-4146.930281	0.5984	415.5	1828.5	1.0000	0.1995	0.1995		501.821772	1	0.000e+00
TPV-DO_00521_VS_TPV-SL_00547	-1472.024042	1.8578	162.1	662.9	0.0395	0.1071	2.7138		-1553.923780	0.7616	167.5	657.5	1.0000	0.2539	0.2539		163.799476	1	0.000e+00
TPV-DO_00522_VS_TPV-SL_00548	-2590.178611	0.9550	318.7	1304.3	0.0167	0.0254	1.5173		-2844.619649	0.4516	338.3	1284.7	1.0000	0.1505	0.1505		508.882076	1	0.000e+00
TPV-DO_00523_VS_TPV-SL_00550	-4559.648713	0.4386	596.7	2328.3	0.0120	0.0082	0.6844		-4926.142485	0.3054	659.7	2265.3	1.0000	0.1018	0.1018		732.987544	1	0.000e+00
TPV-DO_00524_VS_TPV-SL_00551	-664.510127	0.8446	55.6	298.4	0.1194	0.1304	1.0920		-683.905149	0.6702	68.1	285.9	1.0000	0.2234	0.2234		38.790044	1	4.719e-10
TPV-DO_00525_VS_TPV-SL_00552	-829.691267	0.7500	74.9	408.1	0.0870	0.0951	1.0939		-862.498285	0.5516	77.6	405.4	1.0000	0.1839	0.1839		65.614036	1	5.551e-16
TPV-DO_00526_VS_TPV-SL_00553	-2520.756282	0.5655	295.8	1228.2	0.0456	0.0372	0.8167		-2670.819327	0.3930	305.4	1218.6	1.0000	0.1310	0.1310		300.12609	1	0.000e+00
TPV-DO_00527_VS_TPV-SL_00554	-3575.511984	1.1682	431.9	1632.1	0.0494	0.0775	1.5679		-3779.341720	0.6258	468.0	1596.0	1.0000	0.2086	0.2086		407.659472	1	0.000e+00
TPV-DO_00528_VS_TPV-SL_00555	-5773.468634	1.6808	548.5	2466.5	0.0656	0.1560	2.3783		-6050.137040	0.9270	578.9	2436.1	1.0000	0.3090	0.3090		553.336812	1	0.000e+00
TPV-DO_00530_VS_TPV-SL_00556	-610.961266	2.1709	72.1	281.9	0.0158	0.0529	3.3480		-673.069058	0.5822	68.7	285.3	1.0000	0.1941	0.1941		124.215584	1	0.000e+00
TPV-DO_00531_VS_TPV-SL_00557	-3720.739698	0.7443	490.2	1885.8	0.0093	0.0108	1.1611		-4111.180532	0.3811	511.7	1864.3	1.0000	0.1270	0.1270		780.881668	1	0.000e+00
TPV-DO_00533_VS_TPV-SL_00560	-654.738310	2.0952	74.9	237.1	0.1551	0.3027	1.9511		-668.783238	1.3879	77.7	234.3	1.0000	0.4626	0.4626		28.089856	1	1.158e-07
TPV-DO_00534_VS_TPV-SL_00561	-1516.732601	1.0624	174.2	749.8	0.0148	0.0262	1.7662		-1675.725715	0.4676	190.1	733.9	1.0000	0.1559	0.1559		317.986228	1	0.000e+00
TPV-DO_00535_VS_TPV-SL_00562	-815.215629	11.5665	137.5	390.5	0.0024	0.0357	14.7051		-888.003568	0.4402	123.5	404.5	1.0000	0.1467	0.1467		145.575878	1	0.000e+00
TPV-DO_00536_VS_TPV-SL_00563	-2666.561828	1.2230	291.6	1196.4	0.0433	0.0764	1.7665		-2863.224486	0.6558	296.3	1191.7	1.0000	0.2186	0.2186		393.325316	1	0.000e+00
TPV-DO_00538_VS_TPV-SL_00565	-2977.971233	1.4652	295.9	1450.1	0.0208	0.0545	2.6149		-3263.057286	0.5988	336.1	1409.9	1.0000	0.1996	0.1996		570.172106	1	0.000e+00
TPV-DO_00539_VS_TPV-SL_00566	-2168.304377	1.4885	230.6	1026.4	0.0356	0.0831	2.3352		-2321.812199	0.6340	228.6	1028.4	1.0000	0.2113	0.2113		307.015644	1	0.000e+00
TPV-DO_00540_VS_TPV-SL_00567	-1539.914566	1.1007	168.4	740.6	0.0344	0.0592	1.7204		-1647.604067	0.5495	189.2	719.8	1.0000	0.1832	0.1832		215.379002	1	0.000e+00
TPV-DO_00541_VS_TPV-SL_00568	-622.696995	7.3974	65.5	285.5	0.0071	0.0904	12.8127		-677.532058	0.7655	66.1	284.9	1.0000	0.2552	0.2552		109.670126	1	0.000e+00
TPV-DO_00542_VS_TPV-SL_00569	-3217.095249	1.4717	377.0	1525.0	0.0385	0.0825	2.1410		-3428.048035	0.6509	403.7	1498.3	1.0000	0.2170	0.2170		421.905572	1	0.000e+00
TPV-DO_00543_VS_TPV-SL_00570	-2169.454437	0.9342	274.5	1042.5	0.0241	0.0330	1.3686		-2340.622412	0.3983	285.5	1031.5	1.0000	0.1328	0.1328		342.33595	1	0.000e+00
TPV-DO_00544_VS_TPV-SL_00571	-1352.707245	1.7429	141.6	602.4	0.0636	0.1528	2.4022		-1411.849541	0.8752	145.1	598.9	1.0000	0.2917	0.2917		118.284592	1	0.000e+00
TPV-DO_00545_VS_TPV-SL_00572	-1192.695829	2.7955	153.3	482.7	0.0725	0.2282	3.1470		-1231.036710	1.1374	158.1	477.9	1.0000	0.3791	0.3791		76.681762	1	0.000e+00
TPV-DO_00546_VS_TPV-SL_00573	-682.445579	2.2791	66.2	272.8	0.0675	0.2055	3.0451		-717.459578	1.2527	68.8	270.2	1.0000	0.4176	0.4176		70.027998	1	1.110e-16
TPV-DO_00547_VS_TPV-SL_00574	-1592.075381	6.1670	142.4	622.6	0.0311	0.3023	9.7189		-1655.419939	1.5493	147.7	617.3	1.0000	0.5164	0.5164		126.689116	1	0.000e+00
TPV-DO_00548_VS_TPV-SL_00575	-318.474319	0.4773	35.7	180.3	0.0060	0.0056	0.9350		-349.987470	0.2941	43.3	172.7	1.0000	0.0980	0.0980		63.026302	1	1.998e-15
TPV-DO_00549_VS_TPV-SL_00576	-1525.283994	4.3701	130.7	598.3	0.0504	0.3328	6.6027		-1576.855607	1.6518	135.1	593.9	1.0000	0.5506	0.5506		103.143226	1	0.000e+00
TPV-DO_00550_VS_TPV-SL_00577	-1094.430109	1.2068	150.0	489.0	0.0245	0.0389	1.5872		-1188.566211	0.5540	153.0	486.0	1.0000	0.1847	0.1847		188.272204	1	0.000e+00
TPV-DO_00551_VS_TPV-SL_00578	-5317.640829	1.0191	570.1	2651.9	0.0262	0.0448	1.7115		-5751.121250	0.4937	617.3	2604.7	1.0000	0.1646	0.1646		866.960842	1	0.000e+00
TPV-DO_00552_VS_TPV-SL_00579	-1016.543762	0.8926	132.3	494.7	0.0319	0.0402	1.2596		-1090.714194	0.4503	135.3	491.7	1.0000	0.1501	0.1501		148.340864	1	0.000e+00
TPV-DO_00553_VS_TPV-SL_00580	-1417.152925	0.9299	155.7	696.3	0.0328	0.0486	1.4786		-1524.102345	0.4860	160.0	692.0	1.0000	0.1620	0.1620		213.89884	1	0.000e+00
TPV-DO_00554_VS_TPV-SL_00581	-2101.372235	1.0186	252.7	947.3	0.0552	0.0737	1.3360		-2228.436234	0.5948	259.9	940.1	1.0000	0.1983	0.1983		254.127998	1	0.000e+00
TPV-DO_00555_VS_TPV-SL_00582	-8604.762195	1.3961	991.4	4036.6	0.0382	0.0779	2.0428		-9164.785275	0.6265	1042.6	3985.4	1.0000	0.2088	0.2088		1120.04616	1	0.000e+00
TPV-DO_00556_VS_TPV-SL_00583	-2333.494715	1.9907	286.4	1081.6	0.0273	0.0785	2.8732		-2504.319790	0.6599	287.8	1080.2	1.0000	0.2200	0.2200		341.65015	1	0.000e+00
TPV-DO_00557_VS_TPV-SL_00584	-1226.339445	1.6613	154.7	541.3	0.0494	0.1050	2.1248		-1288.177667	0.7124	163.9	532.1	1.0000	0.2375	0.2375		123.676444	1	0.000e+00
TPV-DO_00558_VS_TPV-SL_00585	-3284.145095	1.2459	382.2	1579.8	0.0280	0.0536	1.9104		-3523.652011	0.5099	380.0	1582.0	1.0000	0.1700	0.1700		479.013832	1	0.000e+00
TPV-DO_00559_VS_TPV-SL_00586	-2471.023404	1.4777	281.0	1075.0	0.0576	0.1122	1.9475		-2594.133643	0.7645	282.3	1073.7	1.0000	0.2548	0.2548		246.220478	1	0.000e+00
TPV-DO_00560_VS_TPV-SL_00587	-1543.917415	3.4974	179.1	687.9	0.0192	0.1008	5.2564		-1666.574074	0.8043	182.3	684.7	1.0000	0.2681	0.2681		245.313318	1	0.000e+00
TPV-DO_00561_VS_TPV-SL_00588	-3160.058495	1.3045	398.5	1515.5	0.0251	0.0479	1.9064		-3413.726651	0.5268	405.1	1508.9	1.0000	0.1756	0.1756		507.336312	1	0.000e+00
TPV-DO_00562_VS_TPV-SL_00589	-1778.456927	2.3959	178.2	820.8	0.0205	0.0838	4.0914		-1911.525585	0.6563	178.3	820.7	1.0000	0.2188	0.2188		266.137316	1	0.000e+00
TPV-DO_00563_VS_TPV-SL_00590	-2692.130685	1.9452	338.5	1188.5	0.0351	0.0915	2.6035		-2864.483933	0.7028	336.0	1191.0	1.0000	0.2343	0.2343		344.706496	1	0.000e+00
TPV-DO_00564_VS_TPV-SL_00591	-2051.082387	4.8523	199.3	892.7	0.0179	0.1471	8.2015		-2211.576707	1.0015	203.4	888.6	1.0000	0.3338	0.3338		320.98864	1	0.000e+00
TPV-DO_00565_VS_TPV-SL_00592	-1147.389635	1.5100	115.2	538.8	0.0354	0.0869	2.4511		-1223.048719	0.6917	126.5	527.5	1.0000	0.2306	0.2306		151.318168	1	0.000e+00
TPV-DO_00566_VS_TPV-SL_00593	-2307.006494	2.6523	256.9	1015.1	0.0267	0.1057	3.9601		-2479.471613	0.8128	264.2	1007.8	1.0000	0.2709	0.2709		344.930238	1	0.000e+00
TPV-DO_00567_VS_TPV-SL_00595	-2199.230165	50.0000	177.3	914.7	0.0026	0.2600	101.3112		-2320.159448	1.4387	175.9	916.1	1.0000	0.4796	0.4796		241.858566	1	0.000e+00
TPV-DO_00568_VS_TPV-SL_00598	-1987.324632	1.6223	239.6	909.4	0.0252	0.0596	2.3673		-2163.313625	0.6147	237.8	911.2	1.0000	0.2049	0.2049		351.977986	1	0.000e+00
TPV-DO_00570_VS_TPV-SL_00596	-2004.622266	2.4873	196.7	901.3	0.0398	0.1557	3.9142		-2101.687190	0.8398	192.6	905.4	1.0000	0.2799	0.2799		194.129848	1	0.000e+00
TPV-DO_00571_VS_TPV-SL_00599	-2306.716658	5.9103	187.1	910.9	0.0349	0.3452	9.8818		-2405.247337	1.8442	193.9	904.1	1.0000	0.6147	0.6147		197.061358	1	0.000e+00
TPV-DO_00572_VS_TPV-SL_00600	-3105.745933	8.0707	281.3	1242.7	0.0204	0.2732	13.3668		-3265.726325	1.4451	282.9	1241.1	1.0000	0.4817	0.4817		319.960784	1	0.000e+00
TPV-DO_00573_VS_TPV-SL_00601	-1148.985969	17.9834	94.9	526.1	0.0030	0.1146	38.5808		-1268.911651	0.9733	96.6	524.4	1.0000	0.3244	0.3244		239.851364	1	0.000e+00
TPV-DO_00574_VS_TPV-SL_00602	-1405.700259	3.5919	147.7	686.3	0.0092	0.0598	6.4833		-1574.887837	0.7121	160.3	673.7	1.0000	0.2374	0.2374		338.375156	1	0.000e+00
TPV-DO_00575_VS_TPV-SL_00604	-2830.120661	19.0907	262.3	1138.7	0.0082	0.2677	32.8259		-2957.609313	1.4857	274.3	1126.7	1.0000	0.4952	0.4952		254.977304	1	0.000e+00
TPV-DO_00577_VS_TPV-SL_00605	-1688.758897	1.8048	206.3	750.7	0.0211	0.0547	2.5915		-1865.248339	0.7226	208.4	748.6	1.0000	0.2409	0.2409		352.978884	1	0.000e+00
TPV-DO_00578_VS_TPV-SL_00606	-1789.965652	1.1486	239.0	838.0	0.0436	0.0652	1.4967		-1899.104849	0.5567	239.1	837.9	1.0000	0.1856	0.1856		218.278394	1	0.000e+00
TPV-DO_00579_VS_TPV-SL_00607	-1351.964614	1.0152	171.6	629.4	0.0321	0.0454	1.4131		-1464.075844	0.5539	180.4	620.6	1.0000	0.1846	0.1846		224.22246	1	0.000e+00
TPV-DO_00580_VS_TPV-SL_00608	-2652.295151	1.2176	273.0	1242.0	0.0338	0.0660	1.9519		-2856.167620	0.5999	284.3	1230.7	1.0000	0.2000	0.2000		407.744938	1	0.000e+00
TPV-DO_00581_VS_TPV-SL_00609	-1037.029386	50.0000	75.5	389.5	0.0044	0.4370	100.3519		-1070.038293	2.1952	78.5	386.5	1.0000	0.7317	0.7317		66.017814	1	4.441e-16
TPV-DO_00582_VS_TPV-SL_00610	-2364.833262	1.1108	251.6	1080.4	0.0448	0.0736	1.6443		-2521.724100	0.5880	254.9	1077.1	1.0000	0.1960	0.1960		313.781676	1	0.000e+00
TPV-DO_00583_VS_TPV-SL_00611	-986.101115	3.6579	117.2	443.8	0.0158	0.0868	5.5097		-1065.936506	0.7355	115.8	445.2	1.0000	0.2452	0.2452		159.670782	1	0.000e+00
TPV-DO_00584_VS_TPV-SL_00612	-1124.633280	1.0817	135.5	461.5	0.0888	0.1083	1.2200		-1177.678269	0.7367	136.2	460.8	1.0000	0.2456	0.2456		106.089978	1	0.000e+00
TPV-DO_00585_VS_TPV-SL_00613	-2922.292506	1.3162	302.7	1200.3	0.0999	0.1559	1.5604		-3048.405777	0.8823	302.9	1200.1	1.0000	0.2941	0.2941		252.226542	1	0.000e+00
TPV-DO_00586_VS_TPV-SL_00614	-2520.280279	1.0477	314.1	1239.9	0.0110	0.0182	1.6558		-2810.443937	0.4703	324.2	1229.8	1.0000	0.1568	0.1568		580.327316	1	0.000e+00
TPV-DO_00587_VS_TPV-SL_00616	-1940.685113	1.8644	192.7	866.3	0.0378	0.1102	2.9196		-2085.069468	0.8500	195.1	863.9	1.0000	0.2833	0.2833		288.76871	1	0.000e+00
TPV-DO_00588_VS_TPV-SL_00617	-1043.050361	2.0833	119.3	417.7	0.0689	0.1736	2.5181		-1094.588043	1.0582	121.1	415.9	1.0000	0.3527	0.3527		103.075364	1	0.000e+00
TPV-DO_00589_VS_TPV-SL_00619	-678.090712	0.7097	73.5	322.5	0.0721	0.0698	0.9680		-710.358094	0.5043	83.5	312.5	1.0000	0.1681	0.1681		64.534764	1	9.992e-16
TPV-DO_00590_VS_TPV-SL_00620	-9136.202279	1.1412	1067.9	4284.1	0.0293	0.0500	1.7058		-9855.751247	0.5489	1127.7	4224.3	1.0000	0.1830	0.1830		1439.097936	1	0.000e+00
TPV-DO_00591_VS_TPV-SL_00621	-2652.369477	1.4006	338.5	1122.5	0.0745	0.1204	1.6156		-2771.302773	0.7797	343.8	1117.2	1.0000	0.2599	0.2599		237.866592	1	0.000e+00
TPV-DO_00592_VS_TPV-SL_00622	-683.014188	0.5308	83.2	348.8	0.0249	0.0207	0.8316		-729.432314	0.3653	104.5	327.5	1.0000	0.1218	0.1218		92.836252	1	0.000e+00
TPV-DO_00593_VS_TPV-SL_00623	-2465.199463	1.2077	309.2	1100.8	0.0539	0.0830	1.5404		-2595.819273	0.6160	316.7	1093.3	1.0000	0.2053	0.2053		261.23962	1	0.000e+00
TPV-DO_00594_VS_TPV-SL_00624	-557.719682	0.6307	59.8	297.2	0.0361	0.0384	1.0647		-596.179024	0.3953	64.9	292.1	1.0000	0.1318	0.1318		76.918684	1	0.000e+00
TPV-DO_00595_VS_TPV-SL_00625	-2941.427818	1.2173	323.9	1236.1	0.1288	0.1688	1.3101		-3031.358658	0.8859	339.4	1220.6	1.0000	0.2953	0.2953		179.86168	1	0.000e+00
TPV-DO_00596_VS_TPV-SL_00626	-2953.398445	2.8768	327.7	1304.3	0.0293	0.1251	4.2776		-3130.742500	0.8213	342.9	1289.1	1.0000	0.2738	0.2738		354.68811	1	0.000e+00
TPV-DO_00597_VS_TPV-SL_00627	-2439.863566	1.0490	288.0	1149.0	0.0466	0.0685	1.4712		-2594.373668	0.5708	313.9	1123.1	1.0000	0.1903	0.1903		309.020204	1	0.000e+00
TPV-DO_00598_VS_TPV-SL_00628	-3506.606529	2.0883	523.6	1741.4	0.0075	0.0220	2.9378		-3849.406038	0.4345	505.6	1759.4	1.0000	0.1448	0.1448		685.599018	1	0.000e+00
TPV-DO_00599_VS_TPV-SL_00629	-520.875074	0.6347	68.1	249.9	0.0458	0.0388	0.8457		-554.310824	0.4287	68.2	249.8	1.0000	0.1429	0.1429		66.8715	1	3.331e-16
TPV-DO_00600_VS_TPV-SL_00630	-1544.724284	50.0000	141.9	611.1	0.0031	0.2734	87.2832		-1618.681348	1.4914	145.2	607.8	1.0000	0.4971	0.4971		147.914128	1	0.000e+00
TPV-DO_00602_VS_TPV-SL_00631	-1462.025262	20.7250	139.0	608.0	0.0049	0.1770	36.3604		-1584.773237	1.2516	144.5	602.5	1.0000	0.4172	0.4172		245.49595	1	0.000e+00
TPV-DO_00603_VS_TPV-SL_00632	-1391.545025	5.2013	125.4	549.6	0.0346	0.2807	8.1045		-1469.204694	1.7197	135.3	539.7	1.0000	0.5732	0.5732		155.319338	1	0.000e+00
TPV-DO_00605_VS_TPV-SL_00633	-1471.899502	50.0000	141.5	596.5	0.0025	0.2180	85.9827		-1561.670695	1.3365	145.1	592.9	1.0000	0.4455	0.4455		179.542386	1	0.000e+00
TPV-DO_00606_VS_TPV-SL_00634	-1644.215244	1.8402	221.0	859.0	0.0040	0.0117	2.9518		-1863.312055	0.4224	224.1	855.9	1.0000	0.1408	0.1408		438.193622	1	0.000e+00
TPV-DO_00607_VS_TPV-SL_00635	-882.055266	0.9512	112.3	481.7	0.0067	0.0109	1.6303		-979.542162	0.3727	111.4	482.6	1.0000	0.1242	0.1242		194.973792	1	0.000e+00
TPV-DO_00608_VS_TPV-SL_00636	-2283.688511	1.6498	247.9	1063.1	0.0248	0.0652	2.6285		-2477.506728	0.6095	248.9	1062.1	1.0000	0.2032	0.2032		387.636434	1	0.000e+00
TPV-DO_00609_VS_TPV-SL_00637	-1919.540634	2.2280	182.8	807.2	0.0461	0.1541	3.3417		-2042.783271	1.0599	201.3	788.7	1.0000	0.3533	0.3533		246.485274	1	0.000e+00
TPV-DO_00610_VS_TPV-SL_00638	-4903.203743	1.4650	525.2	2063.8	0.0679	0.1290	1.9005		-5155.104794	0.8413	528.8	2060.2	1.0000	0.2804	0.2804		503.802102	1	0.000e+00
TPV-DO_00612_VS_TPV-SL_00642	-5991.784700	0.9254	671.5	3051.5	0.0179	0.0283	1.5818		-6564.513246	0.4371	692.8	3030.2	1.0000	0.1457	0.1457		1145.457092	1	0.000e+00
TPV-DO_00614_VS_TPV-SL_00643	-1361.267309	1.2281	146.7	594.3	0.0841	0.1297	1.5425		-1418.750136	0.7691	157.8	583.2	1.0000	0.2564	0.2564		114.965654	1	0.000e+00
TPV-DO_00615_VS_TPV-SL_00644	-742.156226	1.7446	104.9	345.1	0.0169	0.0398	2.3632		-800.252229	0.5064	111.0	339.0	1.0000	0.1688	0.1688		116.192006	1	0.000e+00
TPV-DO_00616_VS_TPV-SL_00645	-1444.588332	0.8658	181.6	718.4	0.0304	0.0388	1.2771		-1551.060404	0.4462	196.6	703.4	1.0000	0.1487	0.1487		212.944144	1	0.000e+00
TPV-DO_00617_VS_TPV-SL_00646	-1157.779161	1.3316	129.3	533.7	0.0390	0.0765	1.9603		-1241.790641	0.6359	132.0	531.0	1.0000	0.2120	0.2120		168.02296	1	0.000e+00
TPV-DO_00618_VS_TPV-SL_00647	-1759.586225	2.9739	138.8	656.2	0.0836	0.3401	4.0702		-1816.597215	1.6706	142.0	653.0	1.0000	0.5569	0.5569		114.02198	1	0.000e+00
TPV-DO_00619_VS_TPV-SL_00648	-2230.501785	1.5431	291.6	1049.4	0.0206	0.0454	2.2019		-2431.899136	0.5826	327.6	1013.4	1.0000	0.1942	0.1942		402.794702	1	0.000e+00
TPV-DO_00620_VS_TPV-SL_00649	-483.872920	2.4876	75.1	212.9	0.0135	0.0413	3.0636		-526.132767	0.5674	73.0	215.0	1.0000	0.1891	0.1891		84.519694	1	0.000e+00
TPV-DO_00621_VS_TPV-SL_00650	-1281.635039	2.2044	157.9	577.1	0.0286	0.0885	3.0976		-1372.883684	0.7442	160.7	574.3	1.0000	0.2481	0.2481		182.49729	1	0.000e+00
TPV-DO_00622_VS_TPV-SL_00652	-5655.592299	1.1728	706.2	2845.8	0.0152	0.0282	1.8524		-6229.680408	0.4655	717.2	2834.8	1.0000	0.1552	0.1552		1148.176218	1	0.000e+00
TPV-DO_00623_VS_TPV-SL_00653	-1734.304031	0.8426	207.4	836.6	0.0453	0.0541	1.1957		-1844.323390	0.4885	211.0	833.0	1.0000	0.1628	0.1628		220.038718	1	0.000e+00
TPV-DO_00624_VS_TPV-SL_00654	-606.629092	0.7262	73.2	310.8	0.0165	0.0196	1.1858		-663.111186	0.3887	80.6	303.4	1.0000	0.1296	0.1296		112.964188	1	0.000e+00
TPV-DO_00625_VS_TPV-SL_00655	-2333.009854	0.9661	237.6	1193.4	0.0194	0.0343	1.7675		-2544.173352	0.4471	255.8	1175.2	1.0000	0.1490	0.1490		422.326996	1	0.000e+00
TPV-DO_00626_VS_TPV-SL_00656	-1812.995494	2.3967	195.4	794.6	0.0426	0.1470	3.4490		-1887.615041	0.8338	207.3	782.7	1.0000	0.2779	0.2779		149.239094	1	0.000e+00
TPV-DO_00628_VS_TPV-SL_00657	-965.189792	1.0639	92.6	384.4	0.1742	0.1847	1.0598		-990.314334	0.8911	93.5	383.5	1.0000	0.2970	0.2970		50.249084	1	1.354e-12
TPV-DO_00629_VS_TPV-SL_00660	-1797.512782	0.9933	204.5	755.5	0.0795	0.0955	1.2015		-1893.626426	0.6918	210.0	750.0	1.0000	0.2306	0.2306		192.227288	1	0.000e+00
TPV-DO_00630_VS_TPV-SL_00661	-2182.993900	2.0728	219.0	831.0	0.1055	0.2496	2.3659		-2248.181215	1.2471	227.5	822.5	1.0000	0.4157	0.4157		130.37463	1	0.000e+00
TPV-DO_00631_VS_TPV-SL_00663	-3031.121322	3.9631	301.4	1282.6	0.0223	0.1417	6.3405		-3246.188157	1.0056	325.8	1258.2	1.0000	0.3352	0.3352		430.13367	1	0.000e+00
TPV-DO_00632_VS_TPV-SL_00664	-1037.892602	0.3877	126.0	498.0	0.1317	0.0555	0.4210		-1064.274252	0.3493	131.6	492.4	1.0000	0.1164	0.1164		52.7633	1	3.763e-13
TPV-DO_00634_VS_TPV-SL_00665	-1420.598064	1.1129	154.7	661.3	0.0493	0.0797	1.6156		-1500.179332	0.6058	160.3	655.7	1.0000	0.2019	0.2019		159.162536	1	0.000e+00
TPV-DO_00635_VS_TPV-SL_00666	-5127.459600	1.6792	638.2	2334.8	0.0398	0.0906	2.2759		-5433.659991	0.6738	645.7	2327.3	1.0000	0.2246	0.2246		612.400782	1	0.000e+00
TPV-DO_00636_VS_TPV-SL_00667	-5089.868154	3.7032	449.0	2014.0	0.0419	0.2388	5.7001		-5321.769454	1.3710	464.1	1998.9	1.0000	0.4570	0.4570		463.8026	1	0.000e+00
TPV-DO_00637_VS_TPV-SL_00669	-2194.060398	0.6119	261.4	1091.6	0.0212	0.0206	0.9699		-2382.569856	0.3849	273.1	1079.9	1.0000	0.1283	0.1283		377.018916	1	0.000e+00
TPV-DO_00638_VS_TPV-SL_00670	-986.648690	0.5267	100.9	511.1	0.0307	0.0283	0.9213		-1059.316924	0.3544	101.2	510.8	1.0000	0.1181	0.1181		145.336468	1	0.000e+00
TPV-DO_00639_VS_TPV-SL_00672	-2358.916264	1.3430	301.8	1111.2	0.0209	0.0407	1.9462		-2582.720948	0.5468	307.3	1105.7	1.0000	0.1823	0.1823		447.609368	1	0.000e+00
TPV-DO_00640_VS_TPV-SL_00674	-890.799576	2.1100	89.1	393.9	0.0579	0.1757	3.0360		-924.547863	0.9066	92.6	390.4	1.0000	0.3022	0.3022		67.496574	1	2.220e-16
TPV-DO_00641_VS_TPV-SL_00677	-1449.849634	1.3690	154.4	655.6	0.0456	0.0914	2.0059		-1536.716631	0.6877	159.6	650.4	1.0000	0.2292	0.2292		173.733994	1	0.000e+00
TPV-DO_00642_VS_TPV-SL_00678	-1662.057762	1.5470	189.8	629.2	0.1075	0.1763	1.6406		-1722.481065	1.0365	204.1	614.9	1.0000	0.3455	0.3455		120.846606	1	0.000e+00
TPV-DO_00643_VS_TPV-SL_00679	-1468.580051	0.9927	168.6	779.4	0.0083	0.0149	1.7911		-1638.650782	0.3962	167.7	780.3	1.0000	0.1321	0.1321		340.141462	1	0.000e+00
TPV-DO_00644_VS_TPV-SL_00680	-898.566876	0.7082	101.9	444.1	0.0270	0.0305	1.1322		-972.598709	0.4649	118.9	427.1	1.0000	0.1550	0.1550		148.063666	1	0.000e+00
TPV-DO_00645_VS_TPV-SL_00681	-2520.863304	1.5557	280.3	1261.7	0.0133	0.0358	2.6913		-2774.242324	0.4848	290.6	1251.4	1.0000	0.1616	0.1616		506.75804	1	0.000e+00
TPV-DO_00646_VS_TPV-SL_00682	-3100.335114	1.1573	301.1	1255.9	0.1187	0.1583	1.3344		-3220.772403	0.8745	304.5	1252.5	1.0000	0.2915	0.2915		240.874578	1	0.000e+00
TPV-DO_00647_VS_TPV-SL_00683	-766.912195	1.0212	84.6	350.4	0.0767	0.1018	1.3280		-798.554773	0.6152	85.1	349.9	1.0000	0.2051	0.2051		63.285156	1	1.776e-15
TPV-DO_00648_VS_TPV-SL_00685	-2035.195519	1.1109	214.3	1030.7	0.0186	0.0368	1.9746		-2248.353651	0.5100	222.5	1022.5	1.0000	0.1700	0.1700		426.316264	1	0.000e+00
TPV-DO_00649_VS_TPV-SL_00686	-822.190230	3.3319	83.9	366.1	0.0177	0.0977	5.5287		-886.881004	0.7175	81.0	369.0	1.0000	0.2392	0.2392		129.381548	1	0.000e+00
TPV-DO_00650_VS_TPV-SL_00687	-2879.161139	1.1813	291.0	1239.0	0.0924	0.1373	1.4861		-2985.791147	0.7759	310.4	1219.6	1.0000	0.2586	0.2586		213.260016	1	0.000e+00
TPV-DO_00651_VS_TPV-SL_00688	-1509.717865	1.1318	157.9	688.1	0.0810	0.1210	1.4942		-1569.383649	0.6930	167.9	678.1	1.0000	0.2310	0.2310		119.331568	1	0.000e+00
TPV-DO_00652_VS_TPV-SL_00689	-2007.463834	0.7818	248.5	1071.5	0.0062	0.0084	1.3483		-2233.001790	0.3469	265.2	1054.8	1.0000	0.1156	0.1156		451.075912	1	0.000e+00
TPV-DO_00653_VS_TPV-SL_00690	-611.148853	0.8478	77.5	279.5	0.0731	0.0753	1.0303		-643.288835	0.6330	84.9	272.1	1.0000	0.2110	0.2110		64.279964	1	1.110e-15
TPV-DO_00654_VS_TPV-SL_00691	-1467.760043	3.2234	125.5	588.5	0.0517	0.2543	4.9207		-1518.433801	1.3146	132.9	581.1	1.0000	0.4382	0.4382		101.347516	1	0.000e+00
TPV-DO_00655_VS_TPV-SL_00692	-1301.415951	2.1626	142.2	550.8	0.0604	0.1720	2.8468		-1350.481404	0.9316	142.2	550.8	1.0000	0.3105	0.3105		98.130906	1	0.000e+00
TPV-DO_00656_VS_TPV-SL_00693	-4063.627684	1.0440	490.1	1882.9	0.0415	0.0603	1.4533		-4322.204885	0.5319	508.3	1864.7	1.0000	0.1773	0.1773		517.154402	1	0.000e+00
TPV-DO_00657_VS_TPV-SL_00694	-3026.259924	0.8276	365.9	1542.1	0.0095	0.0132	1.3830		-3370.803582	0.4064	377.4	1530.6	1.0000	0.1355	0.1355		689.087316	1	0.000e+00
TPV-DO_00658_VS_TPV-SL_00695	-1362.766756	0.7903	127.2	664.8	0.0530	0.0681	1.2847		-1441.670326	0.5236	133.3	658.7	1.0000	0.1745	0.1745		157.80714	1	0.000e+00
TPV-DO_00659_VS_TPV-SL_00696	-1418.590739	1.1492	141.0	666.0	0.0529	0.0927	1.7545		-1495.609053	0.6180	145.5	661.5	1.0000	0.2060	0.2060		154.036628	1	0.000e+00
TPV-DO_00660_VS_TPV-SL_00697	-2185.388682	1.3825	228.2	980.8	0.0510	0.1021	2.0025		-2312.169387	0.6920	232.9	976.1	1.0000	0.2307	0.2307		253.56141	1	0.000e+00
TPV-DO_00661_VS_TPV-SL_00698	-974.524738	1.1094	113.8	444.2	0.0445	0.0688	1.5450		-1044.761012	0.5978	115.7	442.3	1.0000	0.1993	0.1993		140.472548	1	0.000e+00
TPV-DO_00662_VS_TPV-SL_00699	-1305.496754	0.6617	143.8	654.2	0.0377	0.0394	1.0448		-1384.712003	0.3944	159.0	639.0	1.0000	0.1315	0.1315		158.430498	1	0.000e+00
TPV-DO_00663_VS_TPV-SL_00700	-2065.283076	0.9286	259.9	1048.1	0.0126	0.0187	1.4823		-2281.941778	0.4227	260.0	1048.0	1.0000	0.1409	0.1409		433.317404	1	0.000e+00
TPV-DO_00664_VS_TPV-SL_00701	-1885.292782	1.5845	219.9	833.1	0.0499	0.1061	2.1271		-1975.116564	0.6886	223.0	830.0	1.0000	0.2295	0.2295		179.647564	1	0.000e+00
TPV-DO_00666_VS_TPV-SL_00703	-688.403178	2.2345	93.5	320.5	0.0080	0.0258	3.2087		-772.757739	0.5602	93.4	320.6	1.0000	0.1867	0.1867		168.709122	1	0.000e+00
TPV-DO_00667_VS_TPV-SL_00704	-1215.772329	1.2237	137.7	510.3	0.0984	0.1385	1.4068		-1261.822358	0.8215	145.0	503.0	1.0000	0.2738	0.2738		92.100058	1	0.000e+00
TPV-DO_00668_VS_TPV-SL_00705	-934.081642	5.2836	95.2	393.8	0.0165	0.1395	8.4731		-1003.339918	0.9774	103.1	385.9	1.0000	0.3258	0.3258		138.516552	1	0.000e+00
TPV-DO_00669_VS_TPV-SL_00706	-847.111856	1.0756	102.6	410.4	0.0128	0.0219	1.7045		-941.895360	0.4768	112.9	400.1	1.0000	0.1589	0.1589		189.567008	1	0.000e+00
TPV-DO_00670_VS_TPV-SL_00707	-2169.727078	1.5214	190.9	961.1	0.0766	0.1691	2.2092		-2262.485975	0.9374	196.0	956.0	1.0000	0.3125	0.3125		185.517794	1	0.000e+00
TPV-DO_00671_VS_TPV-SL_00708	-3231.879522	0.5966	413.7	1569.3	0.0263	0.0228	0.8668		-3479.773827	0.3855	427.3	1555.7	1.0000	0.1285	0.1285		495.78861	1	0.000e+00
TPV-DO_00672_VS_TPV-SL_00709	-584.919699	1.0986	66.7	290.3	0.0199	0.0359	1.8041		-634.701310	0.4564	68.8	288.2	1.0000	0.1521	0.1521		99.563222	1	0.000e+00
TPV-DO_00673_VS_TPV-SL_00710	-1125.989589	1.3343	97.6	496.4	0.0868	0.1630	1.8775		-1170.147629	0.8766	103.3	490.7	1.0000	0.2922	0.2922		88.31608	1	0.000e+00
TPV-DO_00674_VS_TPV-SL_00711	-2321.295347	1.3679	310.6	1198.4	0.0094	0.0200	2.1381		-2580.325641	0.4347	312.3	1196.7	1.0000	0.1449	0.1449		518.060588	1	0.000e+00
TPV-DO_00675_VS_TPV-SL_00712	-1190.893417	1.8934	131.9	519.1	0.0508	0.1318	2.5969		-1244.577380	0.7919	141.6	509.4	1.0000	0.2640	0.2640		107.367926	1	0.000e+00
TPV-DO_00676_VS_TPV-SL_00713	-1368.674471	0.8305	150.4	722.6	0.0240	0.0346	1.4406		-1473.349446	0.4104	177.3	695.7	1.0000	0.1368	0.1368		209.34995	1	0.000e+00
TPV-DO_00677_VS_TPV-SL_00714	-948.610177	1.8145	111.2	461.8	0.0107	0.0319	2.9850		-1051.873246	0.5052	106.4	466.6	1.0000	0.1684	0.1684		206.526138	1	0.000e+00
TPV-DO_00678_VS_TPV-SL_00715	-1806.661179	1.6554	216.2	863.8	0.0262	0.0653	2.4958		-1955.650373	0.6195	220.9	859.1	1.0000	0.2065	0.2065		297.978388	1	0.000e+00
TPV-DO_00679_VS_TPV-SL_00716	-868.057016	2.6349	62.5	396.5	0.0338	0.1796	5.3146		-913.730824	0.9867	67.7	391.3	1.0000	0.3289	0.3289		91.347616	1	0.000e+00
TPV-DO_00680_VS_TPV-SL_00718	-1048.951841	0.9973	102.8	479.2	0.0665	0.0955	1.4369		-1111.766917	0.6914	103.5	478.5	1.0000	0.2305	0.2305		125.630152	1	0.000e+00
TPV-DO_00681_VS_TPV-SL_00719	-1500.257850	0.8706	145.8	706.2	0.0553	0.0740	1.3377		-1590.882057	0.5522	145.1	706.9	1.0000	0.1841	0.1841		181.248414	1	0.000e+00
TPV-DO_00682_VS_TPV-SL_00720	-574.512394	0.7307	76.2	259.8	0.0532	0.0484	0.9092		-608.647645	0.4931	82.1	253.9	1.0000	0.1644	0.1644		68.270502	1	1.110e-16
TPV-DO_00683_VS_TPV-SL_00721	-2049.039813	0.7555	224.6	1002.4	0.0273	0.0335	1.2265		-2221.691436	0.4534	231.4	995.6	1.0000	0.1511	0.1511		345.303246	1	0.000e+00
TPV-DO_00684_VS_TPV-SL_00722	-683.023243	1.9506	66.8	317.2	0.0236	0.0793	3.3608		-742.200251	0.6844	68.1	315.9	1.0000	0.2281	0.2281		118.354016	1	0.000e+00
TPV-DO_00685_VS_TPV-SL_00723	-1037.728917	3.2528	124.2	436.8	0.0270	0.1209	4.4726		-1106.771006	0.8952	123.5	437.5	1.0000	0.2984	0.2984		138.084178	1	0.000e+00
TPV-DO_00686_VS_TPV-SL_00724	-2971.846525	1.2640	332.2	1263.8	0.0746	0.1176	1.5770		-3114.716525	0.7556	338.9	1257.1	1.0000	0.2519	0.2519		285.74	1	0.000e+00
TPV-DO_00687_VS_TPV-SL_00726	-3388.171547	1.1949	411.9	1637.1	0.0213	0.0389	1.8269		-3705.392975	0.5052	417.1	1631.9	1.0000	0.1684	0.1684		634.442856	1	0.000e+00
TPV-DO_00688_VS_TPV-SL_00727	-1527.460784	2.6405	164.0	664.0	0.0274	0.1095	4.0001		-1630.962162	0.7894	166.0	662.0	1.0000	0.2631	0.2631		207.002756	1	0.000e+00
TPV-DO_00689_VS_TPV-SL_00729	-1412.776747	1.9447	162.4	611.6	0.0317	0.0876	2.7596		-1523.919611	0.7742	167.4	606.6	1.0000	0.2581	0.2581		222.285728	1	0.000e+00
TPV-DO_00690_VS_TPV-SL_00730	-1816.266550	1.4355	171.8	662.2	0.2144	0.2726	1.2718		-1854.620104	1.2735	182.4	651.6	1.0000	0.4245	0.4245		76.707108	1	0.000e+00
TPV-DO_00691_VS_TPV-SL_00731	-4575.430400	1.4630	477.3	1991.7	0.0716	0.1390	1.9422		-4780.444407	0.8394	492.4	1976.6	1.0000	0.2798	0.2798		410.028014	1	0.000e+00
TPV-DO_00692_VS_TPV-SL_00732	-2440.718377	1.9554	276.6	1079.4	0.0393	0.1090	2.7702		-2619.969180	0.8482	277.5	1078.5	1.0000	0.2827	0.2827		358.501606	1	0.000e+00
TPV-DO_00693_VS_TPV-SL_00733	-1411.242354	1.0493	175.6	571.4	0.1044	0.1159	1.1107		-1468.182376	0.7265	181.2	565.8	1.0000	0.2422	0.2422		113.880044	1	0.000e+00
TPV-DO_00694_VS_TPV-SL_00734	-1353.576260	1.5200	119.6	597.4	0.0548	0.1307	2.3840		-1426.337538	0.7406	118.1	598.9	1.0000	0.2469	0.2469		145.522556	1	0.000e+00
TPV-DO_00695_VS_TPV-SL_00735	-720.489669	1.5759	87.6	281.4	0.0859	0.1489	1.7337		-755.568871	0.9508	88.9	280.1	1.0000	0.3169	0.3169		70.158404	1	0.000e+00
TPV-DO_00696_VS_TPV-SL_00737	-4647.460521	2.0388	416.1	1920.9	0.0617	0.1834	2.9704		-4846.349016	1.0022	430.1	1906.9	1.0000	0.3341	0.3341		397.77699	1	0.000e+00
TPV-DO_00697_VS_TPV-SL_00738	-856.800120	1.1678	83.5	387.5	0.0718	0.1182	1.6466		-894.029782	0.6878	87.6	383.4	1.0000	0.2293	0.2293		74.459324	1	0.000e+00
TPV-DO_00698_VS_TPV-SL_00739	-818.675187	2.4413	112.2	343.8	0.0307	0.0929	3.0218		-872.529623	0.7300	111.3	344.7	1.0000	0.2433	0.2433		107.708872	1	0.000e+00
TPV-DO_00699_VS_TPV-SL_00741	-933.275529	2.5933	96.4	425.6	0.0240	0.1015	4.2336		-990.055441	0.6543	100.1	421.9	1.0000	0.2181	0.2181		113.559824	1	0.000e+00
TPV-DO_00700_VS_TPV-SL_00742	-2558.247701	0.7110	265.3	1357.7	0.0169	0.0226	1.3342		-2793.265326	0.3878	302.7	1320.3	1.0000	0.1293	0.1293		470.03525	1	0.000e+00
TPV-DO_00701_VS_TPV-SL_00743	-3043.643251	1.8292	306.6	1373.4	0.0523	0.1416	2.7067		-3179.570878	0.8210	321.3	1358.7	1.0000	0.2737	0.2737		271.855254	1	0.000e+00
TPV-DO_00702_VS_TPV-SL_00744	-2038.091461	2.0929	228.1	902.9	0.0233	0.0739	3.1667		-2209.783317	0.7110	241.3	889.7	1.0000	0.2370	0.2370		343.383712	1	0.000e+00
TPV-DO_00703_VS_TPV-SL_00745	-1486.403967	36.2711	122.4	666.6	0.0020	0.1546	77.1238		-1600.459085	0.9664	124.2	664.8	1.0000	0.3221	0.3221		228.110236	1	0.000e+00
TPV-DO_00704_VS_TPV-SL_00746	-736.540091	1.1089	68.5	327.5	0.0832	0.1272	1.5284		-762.292901	0.6988	76.8	319.2	1.0000	0.2329	0.2329		51.50562	1	7.139e-13
TPV-DO_00705_VS_TPV-SL_00747	-1474.919992	1.2209	133.5	655.5	0.0622	0.1145	1.8424		-1554.571968	0.7558	136.5	652.5	1.0000	0.2519	0.2519		159.303952	1	0.000e+00
TPV-DO_00706_VS_TPV-SL_00748	-2222.622385	1.3986	266.4	960.6	0.0490	0.0894	1.8247		-2367.601285	0.6983	264.1	962.9	1.0000	0.2328	0.2328		289.9578	1	0.000e+00
TPV-DO_00707_VS_TPV-SL_00749	-1538.104838	1.7672	166.3	673.7	0.0374	0.0966	2.5842		-1638.090550	0.7017	168.9	671.1	1.0000	0.2339	0.2339		199.971424	1	0.000e+00
TPV-DO_00709_VS_TPV-SL_00750	-760.757006	2.2976	58.5	373.5	0.0226	0.1116	4.9419		-802.893794	0.6593	58.7	373.3	1.0000	0.2198	0.2198		84.273576	1	0.000e+00
TPV-DO_00710_VS_TPV-SL_00751	-2059.043980	1.6028	206.6	849.4	0.0629	0.1364	2.1695		-2166.176846	0.8927	222.7	833.3	1.0000	0.2976	0.2976		214.265732	1	0.000e+00
TPV-DO_00711_VS_TPV-SL_00752	-2313.546835	1.1825	300.3	1091.7	0.0219	0.0371	1.6921		-2526.730825	0.5449	300.5	1091.5	1.0000	0.1816	0.1816		426.36798	1	0.000e+00
TPV-DO_00712_VS_TPV-SL_00753	-680.802450	3.4310	69.8	317.2	0.0201	0.1166	5.8143		-724.402411	0.8001	74.2	312.8	1.0000	0.2667	0.2667		87.199922	1	0.000e+00
TPV-DO_00714_VS_TPV-SL_00754	-1791.287326	2.9271	211.8	862.2	0.0087	0.0417	4.7767		-2006.295790	0.5843	214.2	859.8	1.0000	0.1948	0.1948		430.016928	1	0.000e+00
TPV-DO_00715_VS_TPV-SL_00755	-5522.221040	1.1763	643.8	2422.2	0.0470	0.0745	1.5869		-5892.649561	0.6593	678.8	2387.2	1.0000	0.2198	0.2198		740.857042	1	0.000e+00
TPV-DO_00716_VS_TPV-SL_00756	-1231.407592	1.0590	127.0	545.0	0.0928	0.1240	1.3360		-1282.361462	0.7249	129.8	542.2	1.0000	0.2416	0.2416		101.90774	1	0.000e+00
TPV-DO_00718_VS_TPV-SL_00759	-703.868209	0.8890	102.4	329.6	0.0401	0.0444	1.1075		-743.224847	0.4213	108.4	323.6	1.0000	0.1404	0.1404		78.713276	1	0.000e+00
TPV-DO_00719_VS_TPV-SL_00760	-814.590974	1.4979	92.4	378.6	0.0397	0.0869	2.1896		-865.550303	0.6496	92.7	378.3	1.0000	0.2165	0.2165		101.918658	1	0.000e+00
TPV-DO_00720_VS_TPV-SL_00761	-1242.961823	0.9542	140.1	570.9	0.0427	0.0587	1.3749		-1335.372970	0.5742	140.9	570.1	1.0000	0.1914	0.1914		184.822294	1	0.000e+00
TPV-DO_00721_VS_TPV-SL_00762	-1049.448730	1.5268	107.6	435.4	0.1046	0.1887	1.8042		-1090.331097	1.0145	107.6	435.4	1.0000	0.3382	0.3382		81.764734	1	0.000e+00
TPV-DO_00722_VS_TPV-SL_00763	-672.660943	1.2651	62.2	312.8	0.0537	0.1075	2.0015		-707.810240	0.7131	67.4	307.6	1.0000	0.2377	0.2377		70.298594	1	0.000e+00
TPV-DO_00724_VS_TPV-SL_00764	-1332.600946	2.3190	140.0	592.0	0.0295	0.1059	3.5942		-1439.453318	0.8578	144.9	587.1	1.0000	0.2859	0.2859		213.704744	1	0.000e+00
TPV-DO_00726_VS_TPV-SL_00765	-969.365119	0.9284	109.8	442.2	0.0677	0.0827	1.2226		-1018.741923	0.5939	119.5	432.5	1.0000	0.1980	0.1980		98.753608	1	0.000e+00
TPV-DO_00727_VS_TPV-SL_00766	-2494.587304	0.7545	266.8	1194.2	0.0527	0.0588	1.1143		-2642.648228	0.4907	275.5	1185.5	1.0000	0.1636	0.1636		296.121848	1	0.000e+00
TPV-DO_00728_VS_TPV-SL_00767	-738.326726	5.6633	79.9	286.1	0.0328	0.2540	7.7344		-764.827376	1.3297	81.8	284.2	1.0000	0.4432	0.4432		53.0013	1	3.333e-13
TPV-DO_00730_VS_TPV-SL_00769	-1808.920236	2.3054	206.8	783.2	0.0315	0.1035	3.2867		-1932.125401	0.7403	209.6	780.4	1.0000	0.2468	0.2468		246.41033	1	0.000e+00
TPV-DO_00731_VS_TPV-SL_00770	-3455.623080	1.1205	352.8	1510.2	0.0534	0.0857	1.6057		-3694.082317	0.7135	368.4	1494.6	1.0000	0.2378	0.2378		476.918474	1	0.000e+00
TPV-DO_00732_VS_TPV-SL_00771	-1108.347742	1.9277	130.8	433.2	0.0843	0.1826	2.1665		-1145.083546	1.0058	136.1	427.9	1.0000	0.3353	0.3353		73.471608	1	0.000e+00
TPV-DO_00734_VS_TPV-SL_00772	-1454.665697	6.6403	145.8	661.2	0.0097	0.1139	11.7351		-1583.384286	0.9321	163.1	643.9	1.0000	0.3107	0.3107		257.437178	1	0.000e+00
TPV-DO_00735_VS_TPV-SL_00773	-500.730112	0.9513	61.2	250.8	0.0195	0.0292	1.4972		-544.789597	0.4228	60.9	251.1	1.0000	0.1409	0.1409		88.11897	1	0.000e+00
TPV-DO_00736_VS_TPV-SL_00774	-1363.527197	0.8670	158.5	636.5	0.0330	0.0422	1.2804		-1476.125895	0.5368	180.5	614.5	1.0000	0.1789	0.1789		225.197396	1	0.000e+00
TPV-DO_00737_VS_TPV-SL_00776	-432.689271	0.2040	48.0	249.0	0.0481	0.0162	0.3370		-447.000291	0.1729	53.9	243.1	1.0000	0.0576	0.0576		28.62204	1	8.798e-08
TPV-DO_00738_VS_TPV-SL_00777	-965.353175	2.2572	91.8	412.2	0.0648	0.2075	3.2004		-1003.923019	1.2304	101.3	402.7	1.0000	0.4101	0.4101		77.139688	1	0.000e+00
TPV-DO_00739_VS_TPV-SL_00778	-1845.973313	0.1243	188.9	1131.1	0.0941	0.0174	0.1852		-1871.715818	0.1115	214.9	1105.1	1.0000	0.0372	0.0372		51.48501	1	7.214e-13
TPV-DO_00740_VS_TPV-SL_00779	-2875.677909	0.1464	451.1	1507.9	0.0275	0.0053	0.1941		-2955.707885	0.1284	537.8	1421.2	1.0000	0.0428	0.0428		160.059952	1	0.000e+00
TPV-DO_00741_VS_TPV-SL_00780	-1012.561332	2.6394	103.5	454.5	0.0337	0.1393	4.1298		-1072.513728	0.9208	110.1	447.9	1.0000	0.3069	0.3069		119.904792	1	0.000e+00
TPV-DO_00742_VS_TPV-SL_00781	-358.017392	1.1425	36.9	161.1	0.0925	0.1347	1.4553		-372.857180	0.7523	37.9	160.1	1.0000	0.2508	0.2508		29.679576	1	5.097e-08
TPV-DO_00743_VS_TPV-SL_00783	-1643.510819	0.9134	180.8	773.2	0.0704	0.0870	1.2346		-1723.669944	0.5863	188.6	765.4	1.0000	0.1954	0.1954		160.31825	1	0.000e+00
TPV-DO_00744_VS_TPV-SL_00784	-1913.319249	0.8534	241.9	1015.1	0.0091	0.0130	1.4234		-2098.163537	0.3417	261.0	996.0	1.0000	0.1139	0.1139		369.688576	1	0.000e+00
TPV-DO_00745_VS_TPV-SL_00785	-965.175258	8.7485	107.8	420.2	0.0107	0.1464	13.7111		-1020.702965	0.8233	103.8	424.2	1.0000	0.2744	0.2744		111.055414	1	0.000e+00
TPV-DO_00747_VS_TPV-SL_00786	-2237.592235	1.3584	252.7	947.3	0.0852	0.1388	1.6297		-2328.212070	0.8103	259.3	940.7	1.0000	0.2701	0.2701		181.23967	1	0.000e+00
TPV-DO_00748_VS_TPV-SL_00787	-1004.195681	2.0265	114.8	443.2	0.0367	0.1055	2.8753		-1076.809873	0.7879	115.0	443.0	1.0000	0.2626	0.2626		145.228384	1	0.000e+00
TPV-DO_00749_VS_TPV-SL_00788	-749.094442	0.4304	95.6	369.4	0.0421	0.0253	0.6000		-793.117249	0.3330	96.2	368.8	1.0000	0.1110	0.1110		88.045614	1	0.000e+00
TPV-DO_00750_VS_TPV-SL_00789	-2920.547277	1.4366	369.6	1436.4	0.0189	0.0413	2.1795		-3196.752372	0.5659	428.7	1377.3	1.0000	0.1886	0.1886		552.41019	1	0.000e+00
TPV-DO_00751_VS_TPV-SL_00790	-1930.937836	1.1993	216.5	974.5	0.0161	0.0330	2.0507		-2118.808260	0.4704	235.5	955.5	1.0000	0.1568	0.1568		375.740848	1	0.000e+00
TPV-DO_00752_VS_TPV-SL_00791	-1889.908426	1.0074	195.3	854.7	0.0658	0.0923	1.4018		-1995.996162	0.6471	200.4	849.6	1.0000	0.2157	0.2157		212.175472	1	0.000e+00
TPV-DO_00753_VS_TPV-SL_00792	-474.864073	1.0389	74.6	219.4	0.0315	0.0393	1.2493		-508.395789	0.5138	75.7	218.3	1.0000	0.1713	0.1713		67.063432	1	2.220e-16
TPV-DO_00754_VS_TPV-SL_00793	-548.187538	1.1270	55.1	217.9	0.1827	0.1974	1.0805		-560.572634	0.9111	55.1	217.9	1.0000	0.3037	0.3037		24.770192	1	6.459e-07
TPV-DO_00755_VS_TPV-SL_00794	-1358.036826	1.8941	166.6	595.4	0.0596	0.1420	2.3800		-1415.765711	0.8758	167.6	594.4	1.0000	0.2919	0.2919		115.45777	1	0.000e+00
TPV-DO_00757_VS_TPV-SL_00797	-1041.529287	1.8752	84.8	437.2	0.0862	0.2297	2.6646		-1074.580658	1.1181	87.0	435.0	1.0000	0.3727	0.3727		66.102742	1	4.441e-16
TPV-DO_00758_VS_TPV-SL_00798	-1206.144955	3.8157	108.5	500.5	0.0336	0.2075	6.1815		-1273.109682	1.3132	118.9	490.1	1.0000	0.4377	0.4377		133.929454	1	0.000e+00
TPV-DO_00759_VS_TPV-SL_00799	-840.169146	1.8955	72.0	342.0	0.0823	0.2150	2.6121		-875.748194	1.1836	75.3	338.7	1.0000	0.3945	0.3945		71.158096	1	0.000e+00
TPV-DO_00767_VS_TPV-SL_00808	-1382.689002	1.2130	158.1	654.9	0.0341	0.0622	1.8220		-1484.601034	0.5638	164.0	649.0	1.0000	0.1879	0.1879		203.824064	1	0.000e+00
TPV-DO_00768_VS_TPV-SL_00809	-3417.728713	1.2883	404.2	1548.8	0.0471	0.0827	1.7577		-3631.994777	0.6546	416.9	1536.1	1.0000	0.2182	0.2182		428.532128	1	0.000e+00
TPV-DO_00769_VS_TPV-SL_00810	-853.671763	2.3579	80.1	405.9	0.0261	0.1099	4.2109		-901.345503	0.7125	90.2	395.8	1.0000	0.2375	0.2375		95.34748	1	0.000e+00
TPV-DO_00770_VS_TPV-SL_00811	-1520.677064	0.8277	187.3	781.7	0.0374	0.0462	1.2345		-1613.493977	0.4320	191.0	778.0	1.0000	0.1440	0.1440		185.633826	1	0.000e+00
TPV-DO_00771_VS_TPV-SL_00812	-1363.201802	1.2941	146.0	649.0	0.0335	0.0685	2.0440		-1459.911403	0.5876	158.7	636.3	1.0000	0.1959	0.1959		193.419202	1	0.000e+00
TPV-DO_00772_VS_TPV-SL_00813	-1343.451126	1.5641	182.2	651.8	0.0061	0.0143	2.3359		-1502.811033	0.4590	180.9	653.1	1.0000	0.1530	0.1530		318.719814	1	0.000e+00
TPV-DO_00773_VS_TPV-SL_00814	-512.505100	1.1768	64.8	250.2	0.0344	0.0580	1.6833		-546.795091	0.5393	64.8	250.2	1.0000	0.1798	0.1798		68.579982	1	1.110e-16
TPV-DO_00774_VS_TPV-SL_00815	-1616.758598	1.0156	198.8	701.2	0.0512	0.0665	1.2982		-1727.097847	0.6323	207.9	692.1	1.0000	0.2108	0.2108		220.678498	1	0.000e+00
TPV-DO_00775_VS_TPV-SL_00816	-692.590175	0.9665	57.1	335.9	0.0696	0.1096	1.5740		-731.040145	0.6852	58.2	334.8	1.0000	0.2284	0.2284		76.89994	1	0.000e+00
TPV-DO_00776_VS_TPV-SL_00817	-1023.452240	0.9960	152.8	432.2	0.0749	0.0786	1.0486		-1070.508513	0.6013	156.7	428.3	1.0000	0.2004	0.2004		94.112546	1	0.000e+00
TPV-DO_00777_VS_TPV-SL_00818	-1828.049286	1.8121	191.5	846.5	0.0358	0.1013	2.8266		-1955.789229	0.7819	200.5	837.5	1.0000	0.2606	0.2606		255.479886	1	0.000e+00
TPV-DO_00778_VS_TPV-SL_00819	-523.102275	1.0524	77.5	216.5	0.0997	0.1038	1.0410		-544.784447	0.7985	86.4	207.6	1.0000	0.2662	0.2662		43.364344	1	4.544e-11
TPV-DO_00779_VS_TPV-SL_00820	-3071.583006	1.1000	355.0	1460.0	0.0311	0.0517	1.6619		-3299.996496	0.5295	385.0	1430.0	1.0000	0.1765	0.1765		456.82698	1	0.000e+00
TPV-DO_00780_VS_TPV-SL_00821	-1389.761489	1.2837	138.1	620.9	0.0647	0.1179	1.8213		-1466.566139	0.8006	144.4	614.6	1.0000	0.2669	0.2669		153.6093	1	0.000e+00
TPV-DO_00781_VS_TPV-SL_00822	-569.463061	4.1209	49.9	241.1	0.0354	0.2419	6.8391		-601.955275	1.3391	50.6	240.4	1.0000	0.4464	0.4464		64.984428	1	7.772e-16
TPV-DO_00782_VS_TPV-SL_00823	-958.349457	1.2099	109.7	457.3	0.0218	0.0416	1.9107		-1048.596692	0.5338	108.8	458.2	1.0000	0.1779	0.1779		180.49447	1	0.000e+00
TPV-DO_00783_VS_TPV-SL_00824	-445.161299	1.4444	45.6	167.4	0.5605	0.4122	0.7355		-445.978544	1.4333	46.9	166.1	1.0000	0.4778	0.4778		1.63449	1	2.011e-01
TPV-DO_00784_VS_TPV-SL_00825	-12471.903530	1.6064	1509.2	5441.8	0.0606	0.1226	2.0242		-13049.012760	0.7818	1567.1	5383.9	1.0000	0.2606	0.2606		1154.21846	1	0.000e+00
TPV-DO_00786_VS_TPV-SL_00827	-564.874906	0.7768	58.9	265.1	0.0663	0.0727	1.0967		-597.206027	0.5347	58.9	265.1	1.0000	0.1782	0.1782		64.662242	1	8.882e-16
TPV-DO_00787_VS_TPV-SL_00828	-490.021551	1.7983	30.1	221.9	0.1068	0.2996	2.8062		-501.362078	1.2377	30.1	221.9	1.0000	0.4126	0.4126		22.681054	1	1.912e-06
TPV-DO_00788_VS_TPV-SL_00829	-2772.557361	0.6634	326.1	1380.9	0.0385	0.0384	0.9951		-2945.056642	0.4033	331.6	1375.4	1.0000	0.1344	0.1344		344.998562	1	0.000e+00
TPV-DO_00789_VS_TPV-SL_00830	-1054.935657	1.5798	122.5	447.5	0.0726	0.1406	1.9372		-1098.889672	0.8622	124.3	445.7	1.0000	0.2874	0.2874		87.90803	1	0.000e+00
TPV-DO_00790_VS_TPV-SL_00831	-990.293833	2.6652	84.7	431.3	0.0326	0.1512	4.6447		-1049.454818	0.9225	84.7	431.3	1.0000	0.3075	0.3075		118.32197	1	0.000e+00
TPV-DO_00791_VS_TPV-SL_00832	-1020.534600	1.2208	99.2	470.8	0.0524	0.0981	1.8727		-1079.952508	0.6733	103.6	466.4	1.0000	0.2244	0.2244		118.835816	1	0.000e+00
TPV-DO_00792_VS_TPV-SL_00833	-6810.994548	0.8102	701.1	3117.9	0.0601	0.0697	1.1611		-7220.554142	0.5610	716.4	3102.6	1.0000	0.1870	0.1870		819.119188	1	0.000e+00
TPV-DO_00793_VS_TPV-SL_00834	-1281.371110	1.0426	139.2	559.8	0.0870	0.1125	1.2924		-1337.377310	0.7222	148.1	550.9	1.0000	0.2407	0.2407		112.0124	1	0.000e+00
TPV-DO_00794_VS_TPV-SL_00835	-2399.091693	0.9555	244.0	1163.0	0.0283	0.0458	1.6184		-2608.146844	0.5191	266.1	1140.9	1.0000	0.1730	0.1730		418.110302	1	0.000e+00
TPV-DO_00795_VS_TPV-SL_00836	-1819.253135	1.0467	217.1	880.9	0.0193	0.0316	1.6364		-1995.240943	0.4916	237.2	860.8	1.0000	0.1639	0.1639		351.975616	1	0.000e+00
TPV-DO_00797_VS_TPV-SL_00837	-1753.190049	0.9916	178.4	859.6	0.0407	0.0654	1.6081		-1870.535790	0.5379	184.3	853.7	1.0000	0.1793	0.1793		234.691482	1	0.000e+00
TPV-DO_00798_VS_TPV-SL_00838	-748.992866	0.7777	71.2	357.8	0.0856	0.0935	1.0918		-779.543443	0.5440	75.4	353.6	1.0000	0.1813	0.1813		61.101154	1	5.440e-15
TPV-DO_00799_VS_TPV-SL_00839	-1072.833184	0.5824	121.5	559.5	0.0309	0.0294	0.9529		-1149.124013	0.3709	128.6	552.4	1.0000	0.1236	0.1236		152.581658	1	0.000e+00
TPV-DO_00800_VS_TPV-SL_00840	-2866.939528	1.3742	355.3	1453.7	0.0101	0.0227	2.2394		-3189.193310	0.4400	353.6	1455.4	1.0000	0.1467	0.1467		644.507564	1	0.000e+00
TPV-DO_00801_VS_TPV-SL_00841	-1735.414076	1.3213	175.1	799.9	0.0623	0.1189	1.9095		-1829.208298	0.7419	175.7	799.3	1.0000	0.2473	0.2473		187.588444	1	0.000e+00
TPV-DO_00802_VS_TPV-SL_00842	-1703.196276	0.9513	198.3	872.7	0.0223	0.0348	1.5593		-1848.608928	0.4359	204.2	866.8	1.0000	0.1453	0.1453		290.825304	1	0.000e+00
TPV-DO_00803_VS_TPV-SL_00843	-719.168165	0.9228	70.6	334.4	0.0489	0.0701	1.4329		-768.090853	0.5782	74.5	330.5	1.0000	0.1927	0.1927		97.845376	1	0.000e+00
TPV-DO_00804_VS_TPV-SL_00844	-1502.579245	3.3044	156.0	687.0	0.0169	0.0935	5.5408		-1631.887058	0.7425	157.5	685.5	1.0000	0.2475	0.2475		258.615626	1	0.000e+00
TPV-DO_00806_VS_TPV-SL_00845	-1951.383736	1.8500	208.4	919.6	0.0282	0.0838	2.9679		-2100.342282	0.6876	220.6	907.4	1.0000	0.2292	0.2292		297.917092	1	0.000e+00
TPV-DO_00807_VS_TPV-SL_00846	-3202.024396	2.0396	302.7	1446.3	0.0441	0.1431	3.2443		-3385.621715	0.9125	309.1	1439.9	1.0000	0.3042	0.3042		367.194638	1	0.000e+00
TPV-DO_00808_VS_TPV-SL_00848	-2171.345071	2.5406	210.9	1091.1	0.0134	0.0655	4.8897		-2336.051497	0.5621	229.1	1072.9	1.0000	0.1874	0.1874		329.412852	1	0.000e+00
TPV-DO_00809_VS_TPV-SL_00849	-1896.253012	50.0000	188.1	678.9	0.0061	0.4610	75.1757		-1947.547539	2.3728	192.8	674.2	1.0000	0.7909	0.7909		102.589054	1	0.000e+00
TPV-DO_00810_VS_TPV-SL_00850	-2311.872080	2.4637	260.4	960.6	0.0425	0.1413	3.3291		-2448.322536	0.9820	269.6	951.4	1.0000	0.3273	0.3273		272.900912	1	0.000e+00
TPV-DO_00811_VS_TPV-SL_00851	-6759.823240	1.8274	815.4	3081.6	0.0216	0.0582	2.6912		-7414.131752	0.6415	793.9	3103.1	1.0000	0.2138	0.2138		1308.617024	1	0.000e+00
TPV-DO_00812_VS_TPV-SL_00852	-1173.314229	0.8751	163.4	556.6	0.0215	0.0258	1.1973		-1278.430577	0.4922	182.2	537.8	1.0000	0.1641	0.1641		210.232696	1	0.000e+00
TPV-DO_00813_VS_TPV-SL_00853	-1086.948636	1.2731	125.8	453.2	0.0882	0.1308	1.4826		-1130.847134	0.7671	131.3	447.7	1.0000	0.2557	0.2557		87.796996	1	0.000e+00
TPV-DO_00814_VS_TPV-SL_00854	-904.218310	0.7689	98.4	468.6	0.0092	0.0131	1.4150		-1003.542226	0.3884	100.8	466.2	1.0000	0.1295	0.1295		198.647832	1	0.000e+00
TPV-DO_00815_VS_TPV-SL_00855	-542.991144	1.4180	52.7	241.3	0.0659	0.1336	2.0261		-570.450655	0.8129	54.1	239.9	1.0000	0.2710	0.2710		54.919022	1	1.256e-13
TPV-DO_00816_VS_TPV-SL_00856	-2769.641749	0.9218	324.3	1253.7	0.0303	0.0405	1.3385		-3004.302522	0.5513	343.9	1234.1	1.0000	0.1838	0.1838		469.321546	1	0.000e+00
TPV-DO_00817_VS_TPV-SL_00857	-1943.578871	1.9910	179.5	837.5	0.0545	0.1635	2.9971		-2033.643279	0.9521	192.6	824.4	1.0000	0.3174	0.3174		180.128816	1	0.000e+00
TPV-DO_00818_VS_TPV-SL_00858	-890.888875	1.9456	87.5	350.5	0.1066	0.2425	2.2746		-922.167598	1.2905	90.0	348.0	1.0000	0.4302	0.4302		62.557446	1	2.554e-15
TPV-DO_00819_VS_TPV-SL_00859	-1218.362506	0.6319	132.2	584.8	0.0481	0.0453	0.9418		-1292.674142	0.4431	134.4	582.6	1.0000	0.1477	0.1477		148.623272	1	0.000e+00
TPV-DO_00820_VS_TPV-SL_00860	-781.461820	1.2178	90.0	375.0	0.0169	0.0331	1.9589		-859.872046	0.5059	95.6	369.4	1.0000	0.1686	0.1686		156.820452	1	0.000e+00
TPV-DO_00821_VS_TPV-SL_00861	-946.725709	2.4318	79.1	397.9	0.0886	0.2996	3.3809		-978.686267	1.4376	82.0	395.0	1.0000	0.4792	0.4792		63.921116	1	1.332e-15
TPV-DO_00822_VS_TPV-SL_00862	-1004.426453	1.0132	117.2	506.8	0.0115	0.0196	1.7129		-1110.058414	0.4230	134.8	489.2	1.0000	0.1410	0.1410		211.263922	1	0.000e+00
TPV-DO_00823_VS_TPV-SL_00863	-1056.592779	1.9487	143.0	409.0	0.0664	0.1399	2.1068		-1109.311973	0.9629	147.2	404.8	1.0000	0.3210	0.3210		105.438388	1	0.000e+00
TPV-DO_00825_VS_TPV-SL_00864	-1018.413215	6.2321	89.1	408.9	0.0232	0.2438	10.4913		-1067.539192	1.3427	90.4	407.6	1.0000	0.4476	0.4476		98.251954	1	0.000e+00
TPV-DO_00826_VS_TPV-SL_00865	-1047.073235	1.5957	136.0	473.0	0.0304	0.0655	2.1547		-1123.826025	0.6057	143.8	465.2	1.0000	0.2019	0.2019		153.50558	1	0.000e+00
TPV-DO_00827_VS_TPV-SL_00866	-1060.496077	1.9307	113.8	465.2	0.0476	0.1305	2.7420		-1118.177160	0.8087	115.5	463.5	1.0000	0.2696	0.2696		115.362166	1	0.000e+00
TPV-DO_00828_VS_TPV-SL_00867	-1622.093857	1.5863	176.2	726.8	0.0277	0.0674	2.4319		-1773.712679	0.7116	181.3	721.7	1.0000	0.2372	0.2372		303.237644	1	0.000e+00
TPV-DO_00829_VS_TPV-SL_00868	-1270.566295	4.5587	96.7	446.3	0.1310	0.6966	5.3195		-1284.215570	2.9283	98.8	444.2	1.0000	0.9761	0.9761		27.29855	1	1.743e-07
TPV-DO_00830_VS_TPV-SL_00869	-876.864465	7.9223	98.3	390.7	0.0092	0.1171	12.6718		-937.496541	0.8030	102.4	386.6	1.0000	0.2677	0.2677		121.264152	1	0.000e+00
TPV-DO_00831_VS_TPV-SL_00870	-1562.779616	0.9272	177.2	761.8	0.0286	0.0417	1.4586		-1692.591673	0.4861	175.7	763.3	1.0000	0.1620	0.1620		259.624114	1	0.000e+00
TPV-DO_00832_VS_TPV-SL_00871	-1454.303025	1.3042	181.2	646.8	0.0341	0.0605	1.7707		-1562.782697	0.5987	184.0	644.0	1.0000	0.1996	0.1996		216.959344	1	0.000e+00
TPV-DO_00833_VS_TPV-SL_00872	-527.652960	0.6433	58.6	253.4	0.1080	0.0841	0.7785		-545.533635	0.5047	60.3	251.7	1.0000	0.1682	0.1682		35.76135	1	2.230e-09
TPV-DO_00834_VS_TPV-SL_00873	-884.088116	1.1831	111.5	419.5	0.0151	0.0269	1.7775		-976.701535	0.5232	121.5	409.5	1.0000	0.1744	0.1744		185.226838	1	0.000e+00
TPV-DO_00835_VS_TPV-SL_00874	-533.634326	50.0000	51.4	203.6	0.0041	0.3350	81.4217		-551.845560	1.7514	55.7	199.3	1.0000	0.5838	0.5838		36.422468	1	1.589e-09
TPV-DO_00837_VS_TPV-SL_00876	-1819.064137	0.9929	234.5	932.5	0.0096	0.0153	1.5861		-2024.279771	0.4242	240.6	926.4	1.0000	0.1414	0.1414		410.431268	1	0.000e+00
TPV-DO_00838_VS_TPV-SL_00877	-1638.477522	0.9152	232.9	751.1	0.0405	0.0462	1.1399		-1740.136924	0.4322	238.5	745.5	1.0000	0.1441	0.1441		203.318804	1	0.000e+00
TPV-DO_00839_VS_TPV-SL_00878	-1588.800627	1.4330	199.2	673.8	0.0599	0.1042	1.7407		-1668.280133	0.6993	199.5	673.5	1.0000	0.2331	0.2331		158.959012	1	0.000e+00
TPV-DO_00840_VS_TPV-SL_00879	-1287.926152	1.0001	128.8	600.2	0.0786	0.1085	1.3811		-1337.499107	0.6120	135.8	593.2	1.0000	0.2040	0.2040		99.14591	1	0.000e+00
TPV-DO_00841_VS_TPV-SL_00880	-2349.152588	3.9643	237.1	1040.9	0.0278	0.1763	6.3481		-2457.115887	0.9749	244.9	1033.1	1.0000	0.3250	0.3250		215.926598	1	0.000e+00
TPV-DO_00842_VS_TPV-SL_00881	-1946.529774	1.5317	215.5	984.5	0.0140	0.0374	2.6726		-2155.129708	0.4952	217.0	983.0	1.0000	0.1651	0.1651		417.199868	1	0.000e+00
TPV-DO_00844_VS_TPV-SL_00882	-1692.564020	1.0976	225.9	857.1	0.0077	0.0132	1.7037		-1897.297984	0.4368	227.9	855.1	1.0000	0.1456	0.1456		409.467928	1	0.000e+00
TPV-DO_00845_VS_TPV-SL_00883	-2534.957633	1.4200	259.9	1054.1	0.1005	0.1708	1.7000		-2615.138399	0.8854	279.3	1034.7	1.0000	0.2951	0.2951		160.361532	1	0.000e+00
TPV-DO_00846_VS_TPV-SL_00884	-7979.878084	0.9074	1044.8	4061.2	0.0152	0.0212	1.3958		-8728.132128	0.4158	1084.3	4021.7	1.0000	0.1386	0.1386		1496.508088	1	0.000e+00
TPV-DO_00847_VS_TPV-SL_00885	-1385.926670	1.1703	137.2	654.8	0.0625	0.1084	1.7346		-1455.140137	0.6825	146.1	645.9	1.0000	0.2275	0.2275		138.426934	1	0.000e+00
TPV-DO_00848_VS_TPV-SL_00886	-3443.314616	1.4485	304.2	1345.8	0.1521	0.2381	1.5656		-3542.707787	1.1545	309.5	1340.5	1.0000	0.3848	0.3848		198.786342	1	0.000e+00
TPV-DO_00849_VS_TPV-SL_00887	-2905.329033	1.3898	308.8	1317.2	0.0320	0.0687	2.1460		-3164.419886	0.6871	319.5	1306.5	1.0000	0.2290	0.2290		518.181706	1	0.000e+00
TPV-DO_00850_VS_TPV-SL_00889	-4161.570453	1.8573	468.7	1997.3	0.0169	0.0512	3.0390		-4555.051125	0.5857	472.2	1993.8	1.0000	0.1952	0.1952		786.961344	1	0.000e+00
TPV-DO_00851_VS_TPV-SL_00890	-2279.294607	1.4870	203.4	915.6	0.1100	0.2006	1.8240		-2367.741608	1.0651	203.3	915.7	1.0000	0.3550	0.3550		176.894002	1	0.000e+00
TPV-DO_00853_VS_TPV-SL_00891	-558.630847	10.8153	84.5	254.5	0.0051	0.0723	14.2462		-607.959305	0.6230	75.4	263.6	1.0000	0.2077	0.2077		98.656916	1	0.000e+00
TPV-DO_00854_VS_TPV-SL_00892	-978.423753	1.2610	90.6	485.4	0.0415	0.0908	2.1864		-1046.962901	0.7166	96.0	480.0	1.0000	0.2389	0.2389		137.078296	1	0.000e+00
TPV-DO_00855_VS_TPV-SL_00893	-1119.134931	1.5311	108.1	530.9	0.0365	0.0933	2.5578		-1188.878731	0.6361	110.7	528.3	1.0000	0.2120	0.2120		139.4876	1	0.000e+00
TPV-DO_00856_VS_TPV-SL_00894	-489.288750	0.5350	56.3	231.7	0.0489	0.0371	0.7600		-514.763105	0.4218	67.6	220.4	1.0000	0.1406	0.1406		50.94871	1	9.481e-13
TPV-DO_00857_VS_TPV-SL_00895	-788.497752	0.8957	87.1	404.9	0.0220	0.0337	1.5295		-850.988596	0.4015	90.3	401.7	1.0000	0.1338	0.1338		124.981688	1	0.000e+00
TPV-DO_00858_VS_TPV-SL_00896	-1557.905717	0.9531	186.4	740.6	0.0279	0.0397	1.4221		-1688.608854	0.4984	194.9	732.1	1.0000	0.1661	0.1661		261.406274	1	0.000e+00
TPV-DO_00859_VS_TPV-SL_00897	-3907.546244	3.8229	421.0	1709.0	0.0193	0.1153	5.9795		-4184.605970	0.8517	439.6	1690.4	1.0000	0.2839	0.2839		554.119452	1	0.000e+00
TPV-DO_00860_VS_TPV-SL_00898	-1721.197701	0.8812	230.6	867.4	0.0153	0.0202	1.3228		-1887.430109	0.4155	237.6	860.4	1.0000	0.1385	0.1385		332.464816	1	0.000e+00
TPV-DO_00861_VS_TPV-SL_00899	-314.162076	3.3072	72.0	126.0	0.0569	0.1569	2.7582		-319.226482	0.6657	70.0	128.0	1.0000	0.2219	0.2219		10.128812	1	1.460e-03
TPV-DO_00862_VS_TPV-SL_00900	-643.800082	0.8190	66.8	341.2	0.0219	0.0328	1.5004		-694.937868	0.4334	93.3	314.7	1.0000	0.1445	0.1445		102.275572	1	0.000e+00
TPV-DO_00863_VS_TPV-SL_00901	-743.155476	1.0163	81.2	359.8	0.0562	0.0828	1.4729		-786.241248	0.6249	81.2	359.8	1.0000	0.2083	0.2083		86.171544	1	0.000e+00
TPV-DO_00864_VS_TPV-SL_00902	-1605.278949	3.5577	166.8	769.2	0.0196	0.1199	6.1029		-1710.423056	0.7918	181.6	754.4	1.0000	0.2639	0.2639		210.288214	1	0.000e+00
TPV-DO_00865_VS_TPV-SL_00903	-613.097577	1.9491	61.4	265.6	0.0490	0.1398	2.8558		-647.869410	0.9870	68.0	259.0	1.0000	0.3290	0.3290		69.543666	1	1.110e-16
TPV-DO_00866_VS_TPV-SL_00904	-826.535771	0.8050	101.7	390.3	0.0372	0.0423	1.1356		-888.395623	0.4851	110.9	381.1	1.0000	0.1617	0.1617		123.719704	1	0.000e+00
TPV-DO_00867_VS_TPV-SL_00905	-1020.980565	2.5784	97.2	469.8	0.0202	0.0921	4.5691		-1113.269351	0.7665	96.7	470.3	1.0000	0.2555	0.2555		184.577572	1	0.000e+00
TPV-DO_00868_VS_TPV-SL_00906	-6011.758247	0.9088	703.5	3127.5	0.0113	0.0178	1.5705		-6645.930846	0.4037	731.5	3099.5	1.0000	0.1346	0.1346		1268.345198	1	0.000e+00
TPV-DO_00869_VS_TPV-SL_00907	-2780.006090	0.7064	312.4	1352.6	0.0395	0.0424	1.0715		-2975.784996	0.4492	323.1	1341.9	1.0000	0.1497	0.1497		391.557812	1	0.000e+00
TPV-DO_00870_VS_TPV-SL_00908	-2518.033565	1.7257	219.2	1124.8	0.0639	0.1698	2.6555		-2627.481901	0.9349	227.3	1116.7	1.0000	0.3116	0.3116		218.896672	1	0.000e+00
TPV-DO_00871_VS_TPV-SL_00909	-2991.328489	0.9214	290.9	1377.1	0.0595	0.0818	1.3741		-3174.196284	0.6111	290.5	1377.5	1.0000	0.2037	0.2037		365.73559	1	0.000e+00
TPV-DO_00872_VS_TPV-SL_00910	-734.966455	3.1386	67.9	325.1	0.0334	0.1744	5.2212		-769.069510	0.9082	66.5	326.5	1.0000	0.3027	0.3027		68.20611	1	1.110e-16
TPV-DO_00873_VS_TPV-SL_00911	-2101.273809	1.8073	191.7	990.3	0.0331	0.1051	3.1721		-2257.879769	0.7583	191.9	990.1	1.0000	0.2528	0.2528		313.21192	1	0.000e+00
TPV-DO_00874_VS_TPV-SL_00912	-2192.689196	2.3669	186.3	983.7	0.0405	0.1652	4.0817		-2287.898082	0.8595	191.9	978.1	1.0000	0.2865	0.2865		190.417772	1	0.000e+00
TPV-DO_00875_VS_TPV-SL_00914	-1190.729628	0.7615	139.1	565.9	0.0495	0.0530	1.0704		-1269.877114	0.5103	140.0	565.0	1.0000	0.1701	0.1701		158.294972	1	0.000e+00
TPV-DO_00876_VS_TPV-SL_00915	-5286.686027	1.3813	585.4	2450.6	0.0403	0.0824	2.0432		-5636.755165	0.6493	591.7	2444.3	1.0000	0.2164	0.2164		700.138276	1	0.000e+00
TPV-DO_00878_VS_TPV-SL_00917	-10758.480084	1.0544	1175.4	4863.6	0.0509	0.0760	1.4915		-11462.933209	0.6237	1187.4	4851.6	1.0000	0.2079	0.2079		1408.90625	1	0.000e+00
TPV-DO_00879_VS_TPV-SL_00918	-1623.282898	1.8766	193.8	724.2	0.0481	0.1208	2.5109		-1724.723066	0.8310	190.7	727.3	1.0000	0.2770	0.2770		202.880336	1	0.000e+00
TPV-DO_00880_VS_TPV-SL_00919	-816.059756	0.6995	90.5	410.5	0.0241	0.0281	1.1637		-878.578444	0.3806	95.5	405.5	1.0000	0.1269	0.1269		125.037376	1	0.000e+00
TPV-DO_00881_VS_TPV-SL_00920	-1233.496455	1.1229	103.0	554.0	0.1093	0.1644	1.5034		-1273.905949	0.8046	102.5	554.5	1.0000	0.2682	0.2682		80.818988	1	0.000e+00
TPV-DO_00882_VS_TPV-SL_00921	-1231.132561	1.1745	119.8	534.2	0.0757	0.1209	1.5981		-1298.148067	0.7485	120.1	533.9	1.0000	0.2495	0.2495		134.031012	1	0.000e+00
TPV-DO_00883_VS_TPV-SL_00922	-1453.886886	0.8244	165.5	701.5	0.0691	0.0770	1.1133		-1517.683219	0.5168	178.4	688.6	1.0000	0.1723	0.1723		127.592666	1	0.000e+00
TPV-DO_00884_VS_TPV-SL_00923	-1105.784701	1.8439	139.1	520.9	0.0197	0.0535	2.7164		-1206.516002	0.5769	135.3	524.7	1.0000	0.1923	0.1923		201.462602	1	0.000e+00
TPV-DO_00885_VS_TPV-SL_00924	-592.545627	1.0103	72.8	305.2	0.0223	0.0357	1.5989		-641.285323	0.4382	72.7	305.3	1.0000	0.1461	0.1461		97.479392	1	0.000e+00
TPV-DO_00886_VS_TPV-SL_00925	-423.909193	0.3753	49.1	232.9	0.0365	0.0223	0.6121		-448.983613	0.2852	49.4	232.6	1.0000	0.0951	0.0951		50.14884	1	1.425e-12
TPV-DO_00887_VS_TPV-SL_00926	-4431.966713	1.2634	434.3	2055.7	0.0483	0.0949	1.9654		-4693.870509	0.6556	440.1	2049.9	1.0000	0.2185	0.2185		523.807592	1	0.000e+00
TPV-DO_00888_VS_TPV-SL_00927	-1150.737288	0.6793	132.2	590.8	0.0287	0.0316	1.0975		-1233.628029	0.3812	136.3	586.7	1.0000	0.1271	0.1271		165.781482	1	0.000e+00
TPV-DO_00889_VS_TPV-SL_00928	-478.362660	22.3695	49.2	211.8	0.0030	0.1155	39.0517		-510.151484	0.7411	52.1	208.9	1.0000	0.2470	0.2470		63.577648	1	1.554e-15
TPV-DO_00890_VS_TPV-SL_00929	-2873.044237	2.4637	322.9	1282.1	0.0293	0.1072	3.6562		-3061.010652	0.7499	321.8	1283.2	1.0000	0.2500	0.2500		375.93283	1	0.000e+00
TPV-DO_00891_VS_TPV-SL_00930	-992.261389	2.0104	94.3	577.7	0.0059	0.0271	4.6121		-1113.147303	0.4429	120.7	551.3	1.0000	0.1476	0.1476		241.771828	1	0.000e+00
TPV-DO_00892_VS_TPV-SL_00931	-919.917862	0.6231	125.0	445.0	0.0270	0.0233	0.8639		-986.227025	0.3828	134.2	435.8	1.0000	0.1276	0.1276		132.618326	1	0.000e+00
TPV-DO_00893_VS_TPV-SL_00932	-1986.257033	1.5749	251.6	954.4	0.0191	0.0447	2.3469		-2155.309977	0.5121	263.2	942.8	1.0000	0.1707	0.1707		338.105888	1	0.000e+00
TPV-DO_00894_VS_TPV-SL_00934	-1437.298139	2.3426	146.1	666.9	0.0375	0.1392	3.7092		-1507.211573	0.7713	147.9	665.1	1.0000	0.2571	0.2571		139.826868	1	0.000e+00
TPV-DO_00895_VS_TPV-SL_00935	-654.394943	1.2529	74.0	346.0	0.0066	0.0152	2.2989		-735.238639	0.4322	73.3	346.7	1.0000	0.1441	0.1441		161.687392	1	0.000e+00
TPV-DO_00896_VS_TPV-SL_00936	-1233.812379	2.2304	181.6	604.4	0.0073	0.0228	3.1423		-1367.389686	0.4685	176.1	609.9	1.0000	0.1562	0.1562		267.154614	1	0.000e+00
TPV-DO_00897_VS_TPV-SL_00937	-2929.353451	1.5425	294.2	1280.8	0.0448	0.1031	2.3035		-3137.225044	0.7865	316.3	1258.7	1.0000	0.2622	0.2622		415.743186	1	0.000e+00
TPV-DO_00898_VS_TPV-SL_00938	-1588.016397	0.8817	204.7	827.3	0.0105	0.0150	1.4210		-1753.268266	0.3917	210.1	821.9	1.0000	0.1306	0.1306		330.503738	1	0.000e+00
TPV-DO_00899_VS_TPV-SL_00939	-1001.404726	2.5262	115.5	484.5	0.0188	0.0762	4.0559		-1057.025580	0.5403	113.9	486.1	1.0000	0.1801	0.1801		111.241708	1	0.000e+00
TPV-DO_00900_VS_TPV-SL_00940	-868.136953	0.8738	105.9	425.1	0.0511	0.0619	1.2123		-913.512701	0.4945	113.0	418.0	1.0000	0.1648	0.1648		90.751496	1	0.000e+00
TPV-DO_00901_VS_TPV-SL_00941	-407.060306	1.2796	48.8	200.2	0.0127	0.0263	2.0689		-459.199394	0.5756	50.1	198.9	1.0000	0.1919	0.1919		104.278176	1	0.000e+00
TPV-DO_00902_VS_TPV-SL_00942	-6931.060772	0.6938	798.1	3674.9	0.0089	0.0111	1.2450		-7676.481587	0.3628	812.6	3660.4	1.0000	0.1209	0.1209		1490.84163	1	0.000e+00
TPV-DO_00903_VS_TPV-SL_00943	-2514.413729	1.0167	244.8	1117.2	0.0766	0.1071	1.3969		-2648.472972	0.7123	244.6	1117.4	1.0000	0.2374	0.2374		268.118486	1	0.000e+00
TPV-DO_00904_VS_TPV-SL_00944	-1687.387795	50.0000	128.7	642.3	0.0044	0.4336	97.6693		-1734.423223	2.1753	134.0	637.0	1.0000	0.7251	0.7251		94.070856	1	0.000e+00
TPV-DO_00905_VS_TPV-SL_00945	-2363.753898	1.2994	251.2	1071.8	0.0523	0.0975	1.8652		-2506.751808	0.7034	268.1	1054.9	1.0000	0.2345	0.2345		285.99582	1	0.000e+00
TPV-DO_00906_VS_TPV-SL_00946	-2149.409683	0.7373	201.2	1091.8	0.0475	0.0597	1.2559		-2283.871092	0.4921	224.1	1068.9	1.0000	0.1640	0.1640		268.922818	1	0.000e+00
TPV-DO_00907_VS_TPV-SL_00947	-1987.083086	0.9545	211.4	958.6	0.0483	0.0698	1.4447		-2108.478338	0.5455	220.1	949.9	1.0000	0.1818	0.1818		242.790504	1	0.000e+00
TPV-DO_00908_VS_TPV-SL_00948	-213.864265	0.6823	28.7	97.3	0.2226	0.1267	0.5692		-216.190357	0.5656	28.7	97.3	1.0000	0.1885	0.1885		4.652184	1	3.101e-02
TPV-DO_00909_VS_TPV-SL_00950	-1135.900074	0.8206	127.4	619.6	0.0076	0.0117	1.5469		-1259.753255	0.3491	136.3	610.7	1.0000	0.1164	0.1164		247.706362	1	0.000e+00
TPV-DO_00910_VS_TPV-SL_00951	-1031.587130	1.4180	114.5	512.5	0.0322	0.0728	2.2625		-1095.043772	0.5355	120.2	506.8	1.0000	0.1785	0.1785		126.913284	1	0.000e+00
TPV-DO_00911_VS_TPV-SL_00952	-2337.807398	1.2512	253.7	1057.3	0.0611	0.1049	1.7180		-2469.073373	0.7402	270.0	1041.0	1.0000	0.2467	0.2467		262.53195	1	0.000e+00
TPV-DO_00912_VS_TPV-SL_00953	-2891.280012	2.7787	291.1	1214.9	0.0466	0.1870	4.0114		-3029.035082	1.1247	312.4	1193.6	1.0000	0.3749	0.3749		275.51014	1	0.000e+00
TPV-DO_00913_VS_TPV-SL_00954	-809.478783	1.6292	95.3	402.7	0.0245	0.0630	2.5721		-861.323032	0.4941	98.7	399.3	1.0000	0.1647	0.1647		103.688498	1	0.000e+00
TPV-DO_00914_VS_TPV-SL_00955	-2333.340671	1.2631	285.7	1097.3	0.0543	0.0916	1.6865		-2441.186542	0.6084	310.5	1072.5	1.0000	0.2028	0.2028		215.691742	1	0.000e+00
TPV-DO_00915_VS_TPV-SL_00956	-3837.184098	0.9539	344.9	1794.1	0.0594	0.0895	1.5066		-4069.704593	0.6156	354.3	1784.7	1.0000	0.2052	0.2052		465.04099	1	0.000e+00
TPV-DO_00916_VS_TPV-SL_00957	-3312.332450	0.9757	313.7	1564.3	0.0534	0.0821	1.5381		-3520.219194	0.6106	313.1	1564.9	1.0000	0.2035	0.2035		415.773488	1	0.000e+00
TPV-DO_00917_VS_TPV-SL_00958	-3378.628641	1.6043	374.6	1479.4	0.0730	0.1500	2.0544		-3502.985584	0.8283	389.6	1464.4	1.0000	0.2761	0.2761		248.713886	1	0.000e+00
TPV-DO_00918_VS_TPV-SL_00959	-1796.792874	1.3070	193.5	847.5	0.0465	0.0906	1.9474		-1896.466536	0.6192	196.3	844.7	1.0000	0.2064	0.2064		199.347324	1	0.000e+00
TPV-DO_00919_VS_TPV-SL_00960	-2373.525295	0.8271	290.4	1188.6	0.0403	0.0485	1.2055		-2519.716159	0.4424	297.7	1181.3	1.0000	0.1475	0.1475		292.381728	1	0.000e+00
TPV-DO_00920_VS_TPV-SL_00961	-532.422528	3.1950	53.9	249.1	0.0252	0.1351	5.3619		-570.443413	0.9983	57.0	246.0	1.0000	0.3328	0.3328		76.04177	1	0.000e+00
TPV-DO_00921_VS_TPV-SL_00962	-1427.975278	1.8759	136.5	670.5	0.0393	0.1218	3.0979		-1497.153619	0.7213	149.4	657.6	1.0000	0.2404	0.2404		138.356682	1	0.000e+00
TPV-DO_00922_VS_TPV-SL_00963	-1472.636783	1.6184	144.3	677.7	0.0470	0.1184	2.5179		-1552.509672	0.7836	156.2	665.8	1.0000	0.2612	0.2612		159.745778	1	0.000e+00
TPV-DO_00923_VS_TPV-SL_00964	-937.151921	0.6995	85.3	457.7	0.0740	0.0787	1.0626		-985.334749	0.5385	86.8	456.2	1.0000	0.1795	0.1795		96.365656	1	0.000e+00
TPV-DO_00924_VS_TPV-SL_00965	-2129.422296	0.9674	262.0	989.0	0.0331	0.0453	1.3687		-2294.129798	0.4998	271.5	979.5	1.0000	0.1666	0.1666		329.415004	1	0.000e+00
TPV-DO_00925_VS_TPV-SL_00966	-5653.471047	0.8749	633.5	2684.5	0.0375	0.0494	1.3182		-6069.664275	0.5136	663.1	2654.9	1.0000	0.1712	0.1712		832.386456	1	0.000e+00
TPV-DO_00926_VS_TPV-SL_00967	-1906.682626	1.3803	200.8	855.2	0.0758	0.1387	1.8287		-1990.671496	0.8229	203.7	852.3	1.0000	0.2743	0.2743		167.97774	1	0.000e+00
TPV-DO_00927_VS_TPV-SL_00968	-3121.894847	0.9846	348.8	1490.2	0.0440	0.0641	1.4565		-3329.382683	0.5517	352.1	1486.9	1.0000	0.1839	0.1839		414.975672	1	0.000e+00
TPV-DO_00928_VS_TPV-SL_00969	-2226.453798	0.7861	222.8	1091.2	0.0410	0.0527	1.2871		-2386.419643	0.4975	222.3	1091.7	1.0000	0.1658	0.1658		319.93169	1	0.000e+00
TPV-DO_00929_VS_TPV-SL_00970	-2861.031827	1.3380	280.3	1201.7	0.0696	0.1265	1.8158		-3016.407956	0.8207	280.0	1202.0	1.0000	0.2736	0.2736		310.752258	1	0.000e+00
TPV-DO_00930_VS_TPV-SL_00971	-459.439593	0.7537	37.2	214.8	0.1697	0.1459	0.8596		-468.473670	0.6394	38.9	213.1	1.0000	0.2131	0.2131		18.068154	1	2.131e-05
TPV-DO_00931_VS_TPV-SL_00972	-1587.873454	1.9253	174.5	710.5	0.0344	0.0981	2.8555		-1688.806712	0.7191	177.9	707.1	1.0000	0.2397	0.2397		201.866516	1	0.000e+00
TPV-DO_00932_VS_TPV-SL_00973	-3881.272204	0.9392	383.2	1788.8	0.0721	0.0957	1.3278		-4081.884957	0.6246	383.2	1788.8	1.0000	0.2082	0.2082		401.225506	1	0.000e+00
TPV-DO_00933_VS_TPV-SL_00974	-948.425202	2.0079	107.6	468.4	0.0162	0.0543	3.3472		-1031.621048	0.5239	103.6	472.4	1.0000	0.1746	0.1746		166.391692	1	0.000e+00
TPV-DO_00934_VS_TPV-SL_00975	-1096.837481	0.9986	116.0	523.0	0.0445	0.0679	1.5273		-1169.885851	0.5464	116.7	522.3	1.0000	0.1821	0.1821		146.09674	1	0.000e+00
TPV-DO_00935_VS_TPV-SL_00976	-2417.262697	1.2116	272.2	927.8	0.1262	0.1572	1.2450		-2501.468545	0.9057	283.9	916.1	1.0000	0.3019	0.3019		168.411696	1	0.000e+00
TPV-DO_00936_VS_TPV-SL_00977	-424.886753	0.7207	67.0	215.0	0.0270	0.0251	0.9304		-451.098326	0.3399	66.8	215.2	1.0000	0.1133	0.1133		52.423146	1	4.474e-13
TPV-DO_00937_VS_TPV-SL_00978	-967.570351	1.0053	112.0	509.0	0.0209	0.0355	1.6963		-1050.060886	0.4545	120.4	500.6	1.0000	0.1515	0.1515		164.98107	1	0.000e+00
TPV-DO_00938_VS_TPV-SL_00979	-1631.360834	0.8326	201.9	773.1	0.0419	0.0484	1.1551		-1742.883212	0.5001	205.3	769.7	1.0000	0.1667	0.1667		223.044756	1	0.000e+00
TPV-DO_00939_VS_TPV-SL_00980	-4854.936879	0.9803	532.0	2456.0	0.0213	0.0356	1.6706		-5296.242048	0.4612	551.3	2436.7	1.0000	0.1537	0.1537		882.610338	1	0.000e+00
TPV-DO_00940_VS_TPV-SL_00981	-580.509328	1.4398	70.9	259.1	0.0759	0.1326	1.7480		-604.730885	0.7728	72.5	257.5	1.0000	0.2576	0.2576		48.443114	1	3.400e-12
TPV-DO_00941_VS_TPV-SL_00982	-911.178571	0.6916	84.0	477.0	0.0392	0.0493	1.2589		-967.754094	0.4221	87.7	473.3	1.0000	0.1407	0.1407		113.151046	1	0.000e+00
TPV-DO_00942_VS_TPV-SL_00983	-335.937947	0.8847	33.2	152.8	0.0736	0.0907	1.2333		-350.259929	0.5672	37.1	148.9	1.0000	0.1891	0.1891		28.643964	1	8.698e-08
TPV-DO_00943_VS_TPV-SL_00984	-638.997798	0.8310	52.9	298.1	0.1695	0.1593	0.9397		-650.457544	0.6821	55.3	295.7	1.0000	0.2274	0.2274		22.919492	1	1.689e-06
TPV-DO_00944_VS_TPV-SL_00985	-872.461304	1.2362	99.5	386.5	0.0507	0.0853	1.6812		-923.705556	0.6741	106.7	379.3	1.0000	0.2247	0.2247		102.488504	1	0.000e+00
TPV-DO_00945_VS_TPV-SL_00986	-3917.709988	1.6846	351.2	1592.8	0.1047	0.2206	2.1078		-4052.693805	1.1317	355.8	1588.2	1.0000	0.3772	0.3772		269.967634	1	0.000e+00
TPV-DO_00946_VS_TPV-SL_00987	-1416.857570	0.6239	174.8	680.2	0.0487	0.0416	0.8553		-1511.826624	0.4692	179.8	675.2	1.0000	0.1564	0.1564		189.938108	1	0.000e+00
TPV-DO_00947_VS_TPV-SL_00988	-5003.731104	1.2046	627.8	2501.2	0.0151	0.0285	1.8879		-5484.100176	0.4460	636.5	2492.5	1.0000	0.1487	0.1487		960.738144	1	0.000e+00
TPV-DO_00948_VS_TPV-SL_00990	-474.758614	3.1182	43.1	187.9	0.0480	0.2212	4.6033		-510.337248	1.4849	43.0	188.0	1.0000	0.4950	0.4950		71.157268	1	0.000e+00
TPV-DO_00949_VS_TPV-SL_00991	-1148.124863	2.9926	120.6	494.4	0.0200	0.0942	4.7017		-1240.844206	0.7432	122.6	492.4	1.0000	0.2477	0.2477		185.438686	1	0.000e+00
TPV-DO_00950_VS_TPV-SL_00992	-2353.711827	1.0062	246.9	1250.1	0.0149	0.0282	1.8910		-2588.249918	0.4211	262.9	1234.1	1.0000	0.1404	0.1404		469.076182	1	0.000e+00
TPV-DO_00951_VS_TPV-SL_00993	-1484.437431	1.4012	145.5	634.5	0.1366	0.2144	1.5689		-1520.365792	1.0238	155.8	624.2	1.0000	0.3413	0.3413		71.856722	1	0.000e+00
TPV-DO_00952_VS_TPV-SL_00994	-1348.204331	0.5884	150.4	698.6	0.0241	0.0240	0.9959		-1461.957700	0.3799	153.4	695.6	1.0000	0.1266	0.1266		227.506738	1	0.000e+00
TPV-DO_00953_VS_TPV-SL_00995	-1225.533744	1.5119	114.5	551.5	0.0601	0.1366	2.2729		-1291.901722	0.8018	115.2	550.8	1.0000	0.2673	0.2673		132.735956	1	0.000e+00
TPV-DO_00954_VS_TPV-SL_00996	-1786.808009	1.1294	194.7	882.3	0.0181	0.0349	1.9244		-1973.242111	0.5143	210.1	866.9	1.0000	0.1714	0.1714		372.868204	1	0.000e+00
TPV-DO_00955_VS_TPV-SL_00997	-2081.926687	1.3224	257.7	921.3	0.0566	0.0949	1.6771		-2184.338828	0.6317	273.3	905.7	1.0000	0.2106	0.2106		204.824282	1	0.000e+00
TPV-DO_00956_VS_TPV-SL_00998	-2088.904253	5.6065	192.8	824.2	0.0312	0.2715	8.6965		-2176.583945	1.5354	205.8	811.2	1.0000	0.5118	0.5118		175.359384	1	0.000e+00
TPV-DO_00957_VS_TPV-SL_00999	-1149.638624	1.2204	127.1	550.9	0.0241	0.0474	1.9653		-1249.998324	0.5394	136.1	541.9	1.0000	0.1798	0.1798		200.7194	1	0.000e+00
TPV-DO_00958_VS_TPV-SL_01000	-882.402866	1.5820	78.6	401.4	0.0507	0.1297	2.5575		-927.268832	0.7662	81.5	398.5	1.0000	0.2554	0.2554		89.731932	1	0.000e+00
TPV-DO_00959_VS_TPV-SL_01001	-3857.267570	0.6518	516.1	1946.9	0.0109	0.0109	0.9958		-4225.906415	0.3579	532.6	1930.4	1.0000	0.1193	0.1193		737.27769	1	0.000e+00
TPV-DO_00962_VS_TPV-SL_01002	-406.683136	0.4524	67.9	178.1	0.3420	0.0985	0.2880		-409.511536	0.4211	68.1	177.9	1.0000	0.1404	0.1404		5.6568	1	1.739e-02
TPV-DO_00963_VS_TPV-SL_01003	-1024.905945	0.4767	100.8	496.2	0.1827	0.0905	0.4955		-1040.651910	0.4145	105.0	492.0	1.0000	0.1382	0.1382		31.49193	1	2.003e-08
TPV-DO_00964_VS_TPV-SL_01004	-957.665192	0.7048	109.7	475.3	0.0322	0.0354	1.0990		-1024.237086	0.3847	128.8	456.2	1.0000	0.1282	0.1282		133.143788	1	0.000e+00
TPV-DO_00965_VS_TPV-SL_01005	-693.806222	0.6074	81.1	347.9	0.0379	0.0349	0.9210		-738.645534	0.3832	89.0	340.0	1.0000	0.1277	0.1277		89.678624	1	0.000e+00
TPV-DO_00966_VS_TPV-SL_01006	-921.612869	0.4492	96.1	515.9	0.0206	0.0177	0.8589		-994.286136	0.2937	96.7	515.3	1.0000	0.0979	0.0979		145.346534	1	0.000e+00
TPV-DO_00967_VS_TPV-SL_01007	-769.219751	1.0924	78.2	383.8	0.0194	0.0381	1.9636		-837.142545	0.4895	85.0	377.0	1.0000	0.1632	0.1632		135.845588	1	0.000e+00
TPV-DO_00968_VS_TPV-SL_01008	-1128.221053	3.1493	113.8	441.2	0.0532	0.2258	4.2444		-1175.962923	1.2163	116.5	438.5	1.0000	0.4054	0.4054		95.48374	1	0.000e+00
TPV-DO_00969_VS_TPV-SL_01009	-1574.957367	1.3789	154.8	766.2	0.0294	0.0701	2.3876		-1682.677049	0.5739	178.8	742.2	1.0000	0.1913	0.1913		215.439364	1	0.000e+00
TPV-DO_00970_VS_TPV-SL_01010	-1472.972659	1.6837	125.6	579.4	0.1480	0.2771	1.8720		-1501.392250	1.2805	135.3	569.7	1.0000	0.4268	0.4268		56.839182	1	4.730e-14
TPV-DO_00971_VS_TPV-SL_01011	-779.089246	11.4432	74.2	288.8	0.0215	0.3692	17.2139		-802.232544	1.8624	76.5	286.5	1.0000	0.6208	0.6208		46.286596	1	1.022e-11
TPV-DO_00972_VS_TPV-SL_01012	-1531.976952	1.1867	158.1	702.9	0.0725	0.1181	1.6291		-1601.632395	0.7248	177.2	683.8	1.0000	0.2416	0.2416		139.310886	1	0.000e+00
TPV-DO_00975_VS_TPV-SL_01016	-2044.966553	1.2798	251.3	1035.7	0.0173	0.0352	2.0396		-2225.537579	0.4558	248.8	1038.2	1.0000	0.1519	0.1519		361.142052	1	0.000e+00
TPV-DO_00976_VS_TPV-SL_01017	-3419.474508	1.8706	399.7	1547.3	0.0418	0.1093	2.6144		-3616.691408	0.7619	423.1	1523.9	1.0000	0.2540	0.2540		394.4338	1	0.000e+00
TPV-DO_00977_VS_TPV-SL_01018	-3228.708341	1.8668	354.5	1424.5	0.0547	0.1401	2.5598		-3370.819405	0.8118	365.3	1413.7	1.0000	0.2706	0.2706		284.222128	1	0.000e+00
TPV-DO_00978_VS_TPV-SL_01019	-928.774280	2.1998	103.5	442.5	0.0208	0.0739	3.5523		-997.695543	0.5875	106.2	439.8	1.0000	0.1958	0.1958		137.842526	1	0.000e+00
TPV-DO_00979_VS_TPV-SL_01020	-4721.024441	1.0145	490.9	2251.1	0.0494	0.0761	1.5399		-4989.868757	0.5711	514.9	2227.1	1.0000	0.1904	0.1904		537.688632	1	0.000e+00
TPV-DO_00980_VS_TPV-SL_01021	-1982.507642	1.4067	218.9	780.1	0.1021	0.1602	1.5688		-2052.978102	0.9398	240.4	758.6	1.0000	0.3133	0.3133		140.94092	1	0.000e+00
TPV-DO_00981_VS_TPV-SL_01022	-2219.327373	0.7350	257.2	1044.8	0.0657	0.0643	0.9791		-2331.861928	0.4948	271.5	1030.5	1.0000	0.1649	0.1649		225.06911	1	0.000e+00
TPV-DO_00982_VS_TPV-SL_01023	-2339.485978	0.1279	346.5	1318.5	0.2465	0.0261	0.1058		-2352.427689	0.1225	351.6	1313.4	1.0000	0.0408	0.0408		25.883422	1	3.627e-07
TPV-DO_00983_VS_TPV-SL_01024	-5419.728092	1.0765	581.9	2511.1	0.0416	0.0673	1.6169		-5807.243657	0.5879	604.4	2488.6	1.0000	0.1960	0.1960		775.03113	1	0.000e+00
TPV-DO_00984_VS_TPV-SL_01025	-1723.878499	1.1111	155.8	813.2	0.0732	0.1220	1.6668		-1803.099546	0.7253	161.6	807.4	1.0000	0.2418	0.2418		158.442094	1	0.000e+00
TPV-DO_00985_VS_TPV-SL_01026	-1290.802345	1.7972	123.3	560.7	0.0544	0.1448	2.6643		-1355.094194	0.8339	121.7	562.3	1.0000	0.2780	0.2780		128.583698	1	0.000e+00
TPV-DO_00986_VS_TPV-SL_01027	-4140.166940	1.1746	442.5	2035.5	0.0220	0.0438	1.9912		-4504.785606	0.5041	456.4	2021.6	1.0000	0.1680	0.1680		729.237332	1	0.000e+00
TPV-DO_00987_VS_TPV-SL_01028	-909.031826	2.4364	104.1	360.9	0.0416	0.1318	3.1696		-974.290528	1.1429	114.2	350.8	1.0000	0.3810	0.3810		130.517404	1	0.000e+00
TPV-DO_00988_VS_TPV-SL_01030	-1278.501434	1.9556	164.4	561.6	0.0340	0.0876	2.5794		-1363.918997	0.7007	179.4	546.6	1.0000	0.2336	0.2336		170.835126	1	0.000e+00
TPV-DO_00991_VS_TPV-SL_01032	-1704.670456	0.9761	205.3	811.7	0.0440	0.0604	1.3725		-1815.245705	0.5276	212.9	804.1	1.0000	0.1759	0.1759		221.150498	1	0.000e+00
TPV-DO_00992_VS_TPV-SL_01033	-1394.233680	1.3978	150.3	635.7	0.0402	0.0838	2.0828		-1496.946421	0.7130	156.4	629.6	1.0000	0.2377	0.2377		205.425482	1	0.000e+00
TPV-DO_00993_VS_TPV-SL_01034	-3282.815541	1.4965	376.1	1549.9	0.0350	0.0781	2.2325		-3476.174195	0.6147	401.0	1525.0	1.0000	0.2049	0.2049		386.717308	1	0.000e+00
TPV-DO_00994_VS_TPV-SL_01035	-1634.134874	1.4971	146.7	762.3	0.0376	0.0972	2.5866		-1748.333633	0.6769	153.6	755.4	1.0000	0.2256	0.2256		228.397518	1	0.000e+00
TPV-DO_00995_VS_TPV-SL_01036	-1152.586473	2.3049	116.2	525.8	0.0269	0.1019	3.7846		-1223.608829	0.6993	117.0	525.0	1.0000	0.2331	0.2331		142.044712	1	0.000e+00
TPV-DO_00996_VS_TPV-SL_01037	-2024.011000	3.5459	176.0	814.0	0.0537	0.2861	5.3242		-2102.137752	1.5624	192.2	797.8	1.0000	0.5208	0.5208		156.253504	1	0.000e+00
TPV-DO_00997_VS_TPV-SL_01038	-3659.194313	1.8358	446.9	1752.1	0.0176	0.0495	2.8171		-3992.654279	0.5651	457.7	1741.3	1.0000	0.1884	0.1884		666.919932	1	0.000e+00
TPV-DO_00998_VS_TPV-SL_01039	-1216.134922	1.0668	146.5	516.5	0.0771	0.0976	1.2653		-1277.907585	0.7194	160.2	502.8	1.0000	0.2398	0.2398		123.545326	1	0.000e+00
TPV-DO_00999_VS_TPV-SL_01040	-2219.618589	0.7467	246.0	1044.0	0.0425	0.0470	1.1058		-2380.284896	0.4968	256.5	1033.5	1.0000	0.1656	0.1656		321.332614	1	0.000e+00
TPV-DO_01000_VS_TPV-SL_01041	-1410.026747	1.3915	153.9	686.1	0.0242	0.0553	2.2847		-1536.367701	0.5630	151.5	688.5	1.0000	0.1877	0.1877		252.681908	1	0.000e+00
TPV-DO_01001_VS_TPV-SL_01042	-1036.980180	1.1138	104.8	501.2	0.0437	0.0777	1.7756		-1099.495671	0.5473	102.9	503.1	1.0000	0.1824	0.1824		125.030982	1	0.000e+00
TPV-DO_01002_VS_TPV-SL_01043	-2124.624015	0.7504	268.1	1075.9	0.0120	0.0143	1.1965		-2329.013039	0.3777	278.0	1066.0	1.0000	0.1259	0.1259		408.778048	1	0.000e+00
TPV-DO_01003_VS_TPV-SL_01044	-1120.208721	3.0605	102.1	446.9	0.0457	0.2089	4.5726		-1179.303461	1.1671	100.1	448.9	1.0000	0.3890	0.3890		118.18948	1	0.000e+00
TPV-DO_01004_VS_TPV-SL_01045	-987.088222	0.9649	97.8	427.2	0.1004	0.1205	1.2004		-1030.587532	0.7064	97.8	427.2	1.0000	0.2355	0.2355		86.99862	1	0.000e+00
TPV-DO_01005_VS_TPV-SL_01047	-1804.669692	1.2423	169.4	826.6	0.0525	0.1017	1.9381		-1927.669637	0.7428	173.5	822.5	1.0000	0.2476	0.2476		245.99989	1	0.000e+00
TPV-DO_01006_VS_TPV-SL_01048	-249.294275	0.5470	20.5	129.5	0.0912	0.0772	0.8469		-259.796118	0.4724	20.5	129.5	1.0000	0.1575	0.1575		21.003686	1	4.584e-06
TPV-DO_01008_VS_TPV-SL_01082	-1544.331343	0.1300	230.3	888.7	0.1174	0.0170	0.1449		-1562.527271	0.1141	257.9	861.1	1.0000	0.0380	0.0380		36.391856	1	1.614e-09
TPV-DO_01010_VS_TPV-SL_01086	-2366.733760	0.2151	280.0	1367.0	0.0637	0.0205	0.3218		-2431.503028	0.1771	326.7	1320.3	1.0000	0.0590	0.0590		129.538536	1	0.000e+00
TPV-DO_01012_VS_TPV-SL_01104	-742.811341	3.7811	67.8	367.2	0.0084	0.0652	7.7290		-812.139056	0.6509	84.8	350.2	1.0000	0.2170	0.2170		138.65543	1	0.000e+00
TPV-DO_01014_VS_TPV-SL_01102	-892.307455	1.3513	101.1	405.9	0.0452	0.0864	1.9112		-953.892758	0.7411	108.7	398.3	1.0000	0.2470	0.2470		123.170606	1	0.000e+00
TPV-DO_01015_VS_TPV-SL_01103	-502.273813	1.3832	42.3	179.7	0.4281	0.3674	0.8584		-504.919289	1.3540	43.6	178.4	1.0000	0.4513	0.4513		5.290952	1	2.144e-02
TPV-DO_01019_VS_TPV-SL_01153	-2062.922746	0.7301	213.0	894.0	0.1500	0.1164	0.7763		-2118.030923	0.6100	226.0	881.0	1.0000	0.2033	0.2033		110.216354	1	0.000e+00
TPV-DO_01020_VS_TPV-SL_01154	-597.653945	0.1158	72.4	359.6	0.3443	0.0293	0.0850		-599.195482	0.1129	73.3	358.7	1.0000	0.0376	0.0376		3.083074	1	7.911e-02
TPV-DO_01021_VS_TPV-SL_01156	-351.431950	0.3057	44.4	171.6	0.2963	0.0685	0.2310		-354.138421	0.2923	44.6	171.4	1.0000	0.0974	0.0974		5.412942	1	1.999e-02
TPV-DO_01022_VS_TPV-SL_01076	-835.906446	0.7102	90.1	452.9	0.0259	0.0327	1.2622		-892.024962	0.3537	89.8	453.2	1.0000	0.1179	0.1179		112.237032	1	0.000e+00
TPV-DO_01025_VS_TPV-SL_01111	-2002.266575	2.3913	216.9	869.1	0.0428	0.1457	3.4065		-2088.590483	0.8515	231.1	854.9	1.0000	0.2838	0.2838		172.647816	1	0.000e+00
TPV-DO_01028_VS_TPV-SL_01112	-852.181072	0.8857	92.8	414.2	0.0325	0.0457	1.4087		-918.896881	0.4780	95.2	411.8	1.0000	0.1593	0.1593		133.431618	1	0.000e+00
TPV-DO_01029_VS_TPV-SL_01114	-1463.288368	2.1830	125.1	570.9	0.1145	0.3044	2.6584		-1499.570173	1.4280	129.9	566.1	1.0000	0.4760	0.4760		72.56361	1	0.000e+00
TPV-DO_01033_VS_TPV-SL_01147	-353.963529	0.3316	38.5	198.5	0.0766	0.0374	0.4880		-366.544756	0.2702	38.5	198.5	1.0000	0.0901	0.0901		25.162454	1	5.270e-07
TPV-DO_01035_VS_TPV-SL_01148	-1392.771412	0.5338	190.6	574.4	0.2125	0.0925	0.4354		-1414.439120	0.4777	216.4	548.6	1.0000	0.1592	0.1592		43.335416	1	4.612e-11
TPV-DO_01037_VS_TPV-SL_01115	-835.209925	0.1391	135.0	447.0	0.0715	0.0116	0.1616		-851.193948	0.1277	145.5	436.5	1.0000	0.0426	0.0426		31.968046	1	1.567e-08
TPV-DO_01038_VS_TPV-SL_01116	-4263.052756	0.3201	547.9	2275.1	0.0836	0.0341	0.4082		-4387.242556	0.2614	631.8	2191.2	1.0000	0.0871	0.0871		248.3796	1	0.000e+00
TPV-DO_01039_VS_TPV-SL_01117	-734.689620	0.3816	84.4	350.6	0.2075	0.0731	0.3522		-743.668233	0.3520	88.6	346.4	1.0000	0.1173	0.1173		17.957226	1	2.259e-05
TPV-DO_01040_VS_TPV-SL_01118	-459.559492	0.6649	26.3	234.7	0.2589	0.1720	0.6643		-462.925353	0.6298	27.0	234.0	1.0000	0.2099	0.2099		6.731722	1	9.471e-03
TPV-DO_01041_VS_TPV-SL_01075	-2837.008440	0.9927	356.8	1278.2	0.0534	0.0680	1.2729		-3002.125429	0.5766	376.6	1258.4	1.0000	0.1922	0.1922		330.233978	1	0.000e+00
TPV-DO_01042_VS_TPV-SL_01099	-389.030676	0.8827	41.6	171.4	0.0633	0.0756	1.1939		-412.772495	0.6009	42.7	170.3	1.0000	0.2003	0.2003		47.483638	1	5.546e-12
TPV-DO_01043_VS_TPV-SL_01100	-805.843120	1.0096	96.7	410.3	0.0138	0.0230	1.6661		-889.145818	0.4553	104.9	402.1	1.0000	0.1518	0.1518		166.605396	1	0.000e+00
TPV-DO_01044_VS_TPV-SL_01101	-385.135266	0.5739	52.4	163.6	0.1121	0.0655	0.5843		-398.540949	0.4722	52.8	163.2	1.0000	0.1574	0.1574		26.811366	1	2.243e-07
TPV-DO_01047_VS_TPV-SL_01176	-575.908114	1.5903	75.1	242.9	0.0474	0.0922	1.9463		-609.757764	0.7326	81.0	237.0	1.0000	0.2442	0.2442		67.6993	1	2.220e-16
TPV-DO_01050_VS_TPV-SL_01105	-1299.197656	1.1201	119.0	514.0	0.2818	0.2524	0.8956		-1312.595967	1.0128	123.4	509.6	1.0000	0.3376	0.3376		26.796622	1	2.260e-07
TPV-DO_01054_VS_TPV-SL_01119	-875.041372	0.1963	139.8	421.2	0.2148	0.0342	0.1594		-883.301362	0.1845	142.9	418.1	1.0000	0.0615	0.0615		16.51998	1	4.814e-05
TPV-DO_01056_VS_TPV-SL_01058	-1504.059450	50.0000	95.5	528.5	0.0113	1.1605	102.4722		-1517.926358	5.7773	100.1	523.9	1.0000	1.9258	1.9258		27.733816	1	1.392e-07
TPV-DO_01058_VS_TPV-SL_01127	-798.266446	0.0325	112.2	493.8	0.0977	0.0040	0.0410		-801.722539	0.0302	127.4	478.6	1.0000	0.0101	0.0101		6.912186	1	8.561e-03
TPV-DO_01059_VS_TPV-SL_01128	-1337.200553	0.0000	186.8	932.2	0.4017	0.0000	0.0000		-1337.200641	0.0000	186.8	932.2	1.0000	0.0000	0.0000		0.00017600000001	1	9.894e-01
TPV-DO_01061_VS_TPV-SL_01129	-560.422054	0.3548	91.4	277.6	0.1377	0.0464	0.3366		-571.743902	0.2970	93.7	275.3	1.0000	0.0990	0.0990		22.643696	1	1.950e-06
TPV-DO_01062_VS_TPV-SL_01130	-634.372514	0.0918	90.9	356.1	0.0746	0.0087	0.1164		-643.910584	0.0907	90.9	356.1	1.0000	0.0302	0.0302		19.07614	1	1.256e-05
TPV-DO_01063_VS_TPV-SL_01131	-1169.717420	0.0142	198.9	692.1	0.0915	0.0015	0.0160		-1172.184674	0.0139	212.7	678.3	1.0000	0.0046	0.0046		4.934508	1	2.633e-02
TPV-DO_01064_VS_TPV-SL_01134	-2485.682925	0.0356	374.6	1542.4	0.0882	0.0039	0.0446		-2499.081852	0.0340	404.9	1512.1	1.0000	0.0113	0.0113		26.797854	1	2.259e-07
TPV-DO_01065_VS_TPV-SL_01135	-1741.324502	0.0132	254.4	1113.6	0.0475	0.0009	0.0196		-1747.053917	0.0136	254.5	1113.5	1.0000	0.0045	0.0045		11.45883	1	7.116e-04
TPV-DO_01067_VS_TPV-SL_01136	-846.700185	0.0970	143.0	463.0	0.3334	0.0220	0.0659		-848.927108	0.0940	149.5	456.5	1.0000	0.0313	0.0313		4.453846	1	3.482e-02
TPV-DO_01068_VS_TPV-SL_01185	-875.861483	1.2007	83.4	369.6	0.1026	0.1534	1.4946		-909.150681	0.8625	92.9	360.1	1.0000	0.2875	0.2875		66.578396	1	3.331e-16
TPV-DO_01069_VS_TPV-SL_01187	-1544.638955	2.3232	140.4	636.6	0.0800	0.2517	3.1448		-1586.207768	1.1982	153.4	623.6	1.0000	0.3994	0.3994		83.137626	1	0.000e+00
TPV-DO_01071_VS_TPV-SL_01189	-1451.791744	1.5663	173.3	558.7	0.0853	0.1475	1.7295		-1509.916948	0.9243	193.6	538.4	1.0000	0.3081	0.3081		116.250408	1	0.000e+00
TPV-DO_01072_VS_TPV-SL_01190	-2349.548329	1.3301	241.4	982.6	0.0669	0.1181	1.7672		-2465.058152	0.7824	269.7	954.3	1.0000	0.2608	0.2608		231.019646	1	0.000e+00
TPV-DO_01073_VS_TPV-SL_01192	-817.307716	1.0264	65.6	378.4	0.0594	0.1026	1.7252		-864.209428	0.6775	78.8	365.2	1.0000	0.2258	0.2258		93.803424	1	0.000e+00
TPV-DO_01076_VS_TPV-SL_01195	-3454.119699	1.3589	341.3	1476.7	0.0569	0.1102	1.9364		-3630.403520	0.7667	379.3	1438.7	1.0000	0.2556	0.2556		352.567642	1	0.000e+00
TPV-DO_01077_VS_TPV-SL_01196	-1085.560964	2.0286	103.2	463.8	0.0457	0.1410	3.0817		-1147.030773	0.9721	115.8	451.2	1.0000	0.3240	0.3240		122.939618	1	0.000e+00
TPV-DO_01078_VS_TPV-SL_01198	-1793.276401	1.6198	185.3	696.7	0.0906	0.1736	1.9171		-1855.067850	0.9668	207.8	674.2	1.0000	0.3223	0.3223		123.582898	1	0.000e+00
TPV-DO_01079_VS_TPV-SL_01197	-1309.923723	1.7373	158.6	504.4	0.0749	0.1465	1.9552		-1365.105626	0.9147	181.2	481.8	1.0000	0.3049	0.3049		110.363806	1	0.000e+00
TPV-DO_01081_VS_TPV-SL_01199	-768.220183	0.9197	90.1	320.9	0.0862	0.0922	1.0695		-798.061180	0.6209	105.1	305.9	1.0000	0.2070	0.2070		59.681994	1	1.110e-14
TPV-DO_01082_VS_TPV-SL_01200	-2409.287255	1.0033	299.8	939.2	0.1484	0.1400	0.9437		-2478.369037	0.7919	318.5	920.5	1.0000	0.2640	0.2640		138.163564	1	0.000e+00
TPV-DO_01083_VS_TPV-SL_01201	-2092.827317	0.7297	256.2	952.8	0.0408	0.0406	0.9968		-2237.989102	0.4889	258.6	950.4	1.0000	0.1630	0.1630		290.32357	1	0.000e+00
TPV-DO_01084_VS_TPV-SL_01202	-832.538072	1.8068	83.5	315.5	0.1974	0.3254	1.6483		-846.964413	1.4874	87.3	311.7	1.0000	0.4958	0.4958		28.852682	1	7.810e-08
TPV-DO_01086_VS_TPV-SL_01204	-955.830916	1.2012	94.6	391.4	0.0974	0.1428	1.4659		-995.967829	0.8259	102.5	383.5	1.0000	0.2753	0.2753		80.273826	1	0.000e+00
TPV-DO_01087_VS_TPV-SL_01206	-672.941258	1.0561	81.1	272.9	0.1845	0.1749	0.9480		-686.492786	0.8758	87.0	267.0	1.0000	0.2919	0.2919		27.103056	1	1.929e-07
TPV-DO_01089_VS_TPV-SL_01211	-637.994182	2.5020	101.4	285.6	0.0203	0.0612	3.0095		-679.417439	0.5378	99.5	287.5	1.0000	0.1793	0.1793		82.846514	1	0.000e+00
TPV-DO_01090_VS_TPV-SL_01213	-456.031551	0.7573	38.0	229.0	0.0989	0.1100	1.1119		-467.851901	0.5782	49.8	217.2	1.0000	0.1927	0.1927		23.6407	1	1.161e-06
TPV-DO_01091_VS_TPV-SL_01214	-1181.256393	1.1194	129.3	449.7	0.2115	0.2036	0.9629		-1202.651757	0.9397	136.3	442.7	1.0000	0.3132	0.3132		42.790728	1	6.092e-11
TPV-DO_01092_VS_TPV-SL_01215	-1039.062285	0.4106	131.7	495.3	0.0997	0.0472	0.4739		-1070.661148	0.3488	142.0	485.0	1.0000	0.1163	0.1163		63.197726	1	1.887e-15
TPV-DO_01094_VS_TPV-SL_01217	-1776.759302	2.5940	179.1	720.9	0.0432	0.1598	3.7017		-1880.369962	1.0319	180.8	719.2	1.0000	0.3440	0.3440		207.22132	1	0.000e+00
TPV-DO_01095_VS_TPV-SL_01219	-1203.118842	0.9655	137.2	498.8	0.1754	0.1598	0.9109		-1230.626346	0.7977	148.3	487.7	1.0000	0.2659	0.2659		55.015008	1	1.196e-13
TPV-DO_01096_VS_TPV-SL_01220	-575.780001	1.2534	87.8	272.2	0.0223	0.0357	1.6024		-619.028984	0.4547	90.6	269.4	1.0000	0.1516	0.1516		86.497966	1	0.000e+00
TPV-DO_01098_VS_TPV-SL_01227	-1891.543377	0.8716	200.0	847.0	0.0507	0.0634	1.2521		-2014.457983	0.5824	211.0	836.0	1.0000	0.1941	0.1941		245.829212	1	0.000e+00
TPV-DO_01100_VS_TPV-SL_01229	-907.456183	0.7350	76.1	442.9	0.0559	0.0705	1.2613		-961.904198	0.5174	77.8	441.2	1.0000	0.1725	0.1725		108.89603	1	0.000e+00
TPV-DO_01102_VS_TPV-SL_01230	-1378.198294	1.1339	158.4	615.6	0.0400	0.0639	1.5980		-1483.638446	0.6377	164.2	609.8	1.0000	0.2126	0.2126		210.880304	1	0.000e+00
TPV-DO_01105_VS_TPV-SL_01232	-719.082163	2.3467	73.6	295.4	0.0858	0.2503	2.9183		-740.954478	1.3145	84.1	284.9	1.0000	0.4382	0.4382		43.74463	1	3.741e-11
TPV-DO_01106_VS_TPV-SL_01233	-1713.959138	1.5963	177.0	594.0	0.1813	0.2613	1.4412		-1756.681294	1.2719	193.5	577.5	1.0000	0.4240	0.4240		85.444312	1	0.000e+00
TPV-DO_01107_VS_TPV-SL_01235	-1211.115573	1.0097	146.9	594.1	0.0217	0.0339	1.5608		-1314.456205	0.4716	156.9	584.1	1.0000	0.1572	0.1572		206.681264	1	0.000e+00
TPV-DO_01108_VS_TPV-SL_01236	-3248.747163	0.7429	363.6	1490.4	0.0545	0.0563	1.0322		-3430.573441	0.5082	389.4	1464.6	1.0000	0.1694	0.1694		363.652556	1	0.000e+00
TPV-DO_01109_VS_TPV-SL_01239	-391.263375	0.6851	43.3	175.7	0.1114	0.0886	0.7952		-404.392112	0.5526	45.2	173.8	1.0000	0.1842	0.1842		26.257474	1	2.988e-07
TPV-DO_01110_VS_TPV-SL_01240	-959.791511	1.0320	110.9	441.1	0.0455	0.0660	1.4494		-1021.262291	0.5555	111.9	440.1	1.0000	0.1852	0.1852		122.94156	1	0.000e+00
TPV-DO_01111_VS_TPV-SL_01241	-817.091214	0.7277	89.9	360.1	0.1652	0.1207	0.7306		-834.625849	0.6020	94.4	355.6	1.0000	0.2007	0.2007		35.06927	1	3.182e-09
TPV-DO_01112_VS_TPV-SL_01242	-1575.768386	0.8490	198.9	743.1	0.0404	0.0470	1.1644		-1667.938096	0.4520	206.5	735.5	1.0000	0.1507	0.1507		184.33942	1	0.000e+00
TPV-DO_01114_VS_TPV-SL_01244	-1854.781502	1.7752	191.4	693.6	0.1061	0.2097	1.9758		-1918.151830	1.1198	192.1	692.9	1.0000	0.3733	0.3733		126.740656	1	0.000e+00
TPV-DO_01118_VS_TPV-SL_01245	-728.478326	1.0147	94.4	319.6	0.0352	0.0467	1.3255		-787.185720	0.5730	94.3	319.7	1.0000	0.1910	0.1910		117.414788	1	0.000e+00
TPV-DO_01119_VS_TPV-SL_01247	-660.625806	1.1515	69.3	251.7	0.1275	0.1550	1.2149		-680.133707	0.8284	72.4	248.6	1.0000	0.2761	0.2761		39.015802	1	4.204e-10
TPV-DO_01120_VS_TPV-SL_01248	-792.644473	1.9109	77.8	336.2	0.0366	0.1072	2.9278		-848.396270	0.8103	82.7	331.3	1.0000	0.2701	0.2701		111.503594	1	0.000e+00
TPV-DO_01121_VS_TPV-SL_01249	-980.091223	50.0000	74.7	369.3	0.0041	0.3943	97.0638		-1015.103186	2.0413	77.7	366.3	1.0000	0.6804	0.6804		70.023926	1	1.110e-16
TPV-DO_01123_VS_TPV-SL_01251	-360.274283	0.6245	51.8	176.2	0.0468	0.0370	0.7905		-382.695687	0.4446	51.7	176.3	1.0000	0.1482	0.1482		44.842808	1	2.135e-11
TPV-DO_01124_VS_TPV-SL_01252	-1547.227068	1.0515	154.5	676.5	0.1121	0.1417	1.2646		-1594.805317	0.7391	157.8	673.2	1.0000	0.2464	0.2464		95.156498	1	0.000e+00
TPV-DO_01125_VS_TPV-SL_01253	-1990.250510	0.9134	233.1	942.9	0.0411	0.0542	1.3168		-2107.312254	0.4954	261.9	914.1	1.0000	0.1651	0.1651		234.123488	1	0.000e+00
TPV-DO_01126_VS_TPV-SL_01254	-2177.265220	1.6529	196.3	844.7	0.1304	0.2441	1.8718		-2233.373452	1.1579	205.2	835.8	1.0000	0.3860	0.3860		112.216464	1	0.000e+00
TPV-DO_01127_VS_TPV-SL_01255	-335.540760	0.1857	55.4	175.6	0.0242	0.0058	0.2396		-347.681314	0.1553	59.4	171.6	1.0000	0.0518	0.0518		24.281108	1	8.325e-07
TPV-DO_01128_VS_TPV-SL_01256	-1180.823384	1.5834	116.1	492.9	0.0758	0.1588	2.0948		-1232.939697	0.9412	126.5	482.5	1.0000	0.3137	0.3137		104.232626	1	0.000e+00
TPV-DO_01129_VS_TPV-SL_01257	-1058.826478	5.7315	85.1	364.9	0.0940	0.6768	7.1999		-1073.950906	3.0667	86.2	363.8	1.0000	1.0222	1.0222		30.248856	1	3.800e-08
TPV-DO_01130_VS_TPV-SL_01258	-2394.239901	1.3734	281.9	993.1	0.0556	0.0963	1.7314		-2540.546964	0.7702	305.4	969.6	1.0000	0.2567	0.2567		292.614126	1	0.000e+00
TPV-DO_01131_VS_TPV-SL_01137	-1336.898331	0.0027	264.2	842.8	99.0000	0.0012	0.0000		-1337.153817	0.0028	264.2	842.8	1.0000	0.0009	0.0009		0.510972	1	4.747e-01
TPV-DO_01132_VS_TPV-SL_01138	-603.925683	0.0257	66.2	425.8	0.3094	0.0066	0.0213		-604.308149	0.0248	67.8	424.2	1.0000	0.0083	0.0083		0.764932	1	3.818e-01
TPV-DO_01133_VS_TPV-SL_01260	-1245.746228	1.8556	130.7	526.3	0.0546	0.1393	2.5489		-1306.309958	0.8307	140.5	516.5	1.0000	0.2769	0.2769		121.12746	1	0.000e+00
TPV-DO_01134_VS_TPV-SL_01261	-1588.777436	2.1434	160.8	538.2	0.2136	0.3868	1.8111		-1616.503051	1.6617	163.3	535.7	1.0000	0.5539	0.5539		55.45123	1	9.581e-14
TPV-DO_01135_VS_TPV-SL_01262	-1838.140512	1.2612	209.3	648.7	0.1798	0.1989	1.1065		-1885.484936	1.0591	225.5	632.5	1.0000	0.3530	0.3530		94.688848	1	0.000e+00
TPV-DO_01136_VS_TPV-SL_01263	-4315.093247	0.8673	443.1	2004.9	0.0605	0.0759	1.2540		-4538.912339	0.5563	489.8	1958.2	1.0000	0.1854	0.1854		447.638184	1	0.000e+00
TPV-DO_01137_VS_TPV-SL_01264	-1067.839935	2.5097	104.0	340.0	0.4390	0.6438	1.4667		-1070.470946	2.3025	106.1	337.9	1.0000	0.7675	0.7675		5.262022	1	2.180e-02
TPV-DO_01138_VS_TPV-SL_01265	-1219.994064	1.5162	131.5	519.5	0.0454	0.0963	2.1222		-1306.470734	0.7724	136.4	514.6	1.0000	0.2575	0.2575		172.95334	1	0.000e+00
TPV-DO_01139_VS_TPV-SL_01266	-452.874678	0.5805	59.3	210.7	0.0973	0.0637	0.6547		-469.397072	0.4617	59.6	210.4	1.0000	0.1539	0.1539		33.044788	1	9.006e-09
TPV-DO_01140_VS_TPV-SL_01267	-1506.472060	0.7648	177.1	692.9	0.0647	0.0646	0.9997		-1583.144750	0.5201	194.4	675.6	1.0000	0.1734	0.1734		153.34538	1	0.000e+00
TPV-DO_01141_VS_TPV-SL_01268	-860.463199	1.0176	89.2	369.8	0.0699	0.0946	1.3528		-913.015792	0.6864	89.3	369.7	1.0000	0.2288	0.2288		105.105186	1	0.000e+00
TPV-DO_01142_VS_TPV-SL_01269	-1866.672437	0.9878	203.3	822.7	0.0712	0.0918	1.2900		-1954.372170	0.6359	227.9	798.1	1.0000	0.2120	0.2120		175.399466	1	0.000e+00
TPV-DO_01143_VS_TPV-SL_01270	-1165.953556	2.0642	118.5	523.5	0.0294	0.0969	3.2995		-1248.982940	0.7943	137.9	504.1	1.0000	0.2648	0.2648		166.058768	1	0.000e+00
TPV-DO_01144_VS_TPV-SL_01271	-2374.025738	0.9965	246.0	1017.0	0.1206	0.1373	1.1377		-2438.732772	0.7066	264.9	998.1	1.0000	0.2355	0.2355		129.414068	1	0.000e+00
TPV-DO_01145_VS_TPV-SL_01272	-1224.359965	1.0280	144.9	551.1	0.0387	0.0555	1.4350		-1309.492475	0.6136	160.4	535.6	1.0000	0.2045	0.2045		170.26502	1	0.000e+00
TPV-DO_01146_VS_TPV-SL_01273	-965.869820	0.9015	97.6	400.4	0.1227	0.1252	1.0200		-1000.916989	0.7234	104.8	393.2	1.0000	0.2411	0.2411		70.094338	1	1.110e-16
TPV-DO_01147_VS_TPV-SL_01275	-1209.551803	0.6755	125.1	564.9	0.1042	0.0880	0.8446		-1252.825557	0.5267	128.8	561.2	1.0000	0.1756	0.1756		86.547508	1	0.000e+00
TPV-DO_01148_VS_TPV-SL_01276	-3849.315585	0.7981	424.7	1825.3	0.0543	0.0620	1.1427		-4072.467012	0.5233	459.2	1790.8	1.0000	0.1744	0.1744		446.302854	1	0.000e+00
TPV-DO_01149_VS_TPV-SL_01277	-1716.926679	1.0203	214.6	721.4	0.0997	0.1108	1.1110		-1784.191500	0.7234	224.9	711.1	1.0000	0.2411	0.2411		134.529642	1	0.000e+00
TPV-DO_01150_VS_TPV-SL_01278	-1711.935130	0.6009	193.5	862.5	0.0679	0.0570	0.8390		-1786.687108	0.4154	213.0	843.0	1.0000	0.1385	0.1385		149.503956	1	0.000e+00
TPV-DO_01151_VS_TPV-SL_01279	-1634.579252	2.9666	158.0	532.0	0.2868	0.6301	2.1967		-1647.654317	2.5741	163.1	526.9	1.0000	0.8580	0.8580		26.15013	1	3.159e-07
TPV-DO_01152_VS_TPV-SL_01280	-597.247713	0.9193	61.4	256.6	0.1851	0.1656	0.8947		-609.740804	0.7628	61.6	256.4	1.0000	0.2543	0.2543		24.986182	1	5.774e-07
TPV-DO_01153_VS_TPV-SL_01281	-849.760469	5.2051	94.0	281.0	0.0532	0.3178	5.9728		-881.312511	1.7124	96.1	278.9	1.0000	0.5708	0.5708		63.104084	1	1.998e-15
TPV-DO_01154_VS_TPV-SL_01282	-1470.377648	0.4318	161.2	771.8	0.0721	0.0446	0.6193		-1524.720167	0.3351	178.4	754.6	1.0000	0.1117	0.1117		108.685038	1	0.000e+00
TPV-DO_01155_VS_TPV-SL_01283	-4031.185061	0.9728	395.5	1737.5	0.1229	0.1396	1.1356		-4168.797553	0.7394	395.2	1737.8	1.0000	0.2465	0.2465		275.224984	1	0.000e+00
TPV-DO_01156_VS_TPV-SL_01284	-1392.359772	0.5524	150.7	731.3	0.0408	0.0367	0.8998		-1467.524524	0.3771	182.8	699.2	1.0000	0.1257	0.1257		150.329504	1	0.000e+00
TPV-DO_01157_VS_TPV-SL_01285	-2416.959572	1.3844	236.6	1038.4	0.0720	0.1360	1.8895		-2523.509400	0.7962	248.6	1026.4	1.0000	0.2654	0.2654		213.099656	1	0.000e+00
TPV-DO_01158_VS_TPV-SL_01286	-711.777272	1.4714	74.0	325.0	0.0504	0.1092	2.1661		-747.153420	0.7125	79.9	319.1	1.0000	0.2375	0.2375		70.752296	1	0.000e+00
TPV-DO_01159_VS_TPV-SL_01287	-627.853861	1.6611	78.5	293.5	0.0249	0.0598	2.3995		-672.069955	0.5273	76.6	295.4	1.0000	0.1758	0.1758		88.432188	1	0.000e+00
TPV-DO_01160_VS_TPV-SL_01288	-1022.728491	0.9436	101.8	468.2	0.0939	0.1154	1.2298		-1062.200824	0.6953	103.7	466.3	1.0000	0.2318	0.2318		78.944666	1	0.000e+00
TPV-DO_01161_VS_TPV-SL_01289	-2814.799309	1.1296	312.0	1035.0	0.1854	0.1866	1.0065		-2879.094325	0.9505	344.6	1002.4	1.0000	0.3168	0.3168		128.590032	1	0.000e+00
TPV-DO_01164_VS_TPV-SL_01294	-282.802072	0.4873	27.4	143.6	0.3406	0.1240	0.3641		-284.491992	0.4627	27.4	143.6	1.0000	0.1542	0.1542		3.37984	1	6.600e-02
TPV-DO_01165_VS_TPV-SL_01295	-1888.662031	3.1479	172.4	802.6	0.0286	0.1496	5.2366		-2012.688720	0.9562	174.5	800.5	1.0000	0.3187	0.3187		248.053378	1	0.000e+00
TPV-DO_01167_VS_TPV-SL_01296	-1287.973901	0.7742	147.8	593.2	0.0486	0.0526	1.0827		-1371.853460	0.5162	148.6	592.4	1.0000	0.1721	0.1721		167.759118	1	0.000e+00
TPV-DO_01168_VS_TPV-SL_01297	-1240.795262	0.9896	135.9	614.1	0.0268	0.0436	1.6236		-1329.412241	0.4613	147.8	602.2	1.0000	0.1538	0.1538		177.233958	1	0.000e+00
TPV-DO_01169_VS_TPV-SL_01298	-2012.984089	0.3629	149.9	1179.1	0.0152	0.0145	0.9580		-2147.018234	0.2529	248.1	1080.9	1.0000	0.0843	0.0843		268.06829	1	0.000e+00
TPV-DO_01170_VS_TPV-SL_01299	-578.914028	2.2885	56.2	222.8	0.0757	0.2206	2.9136		-600.213783	1.1778	58.1	220.9	1.0000	0.3926	0.3926		42.59951	1	6.718e-11
TPV-DO_01171_VS_TPV-SL_01300	-1312.815553	2.7588	145.4	529.6	0.0438	0.1612	3.6810		-1380.492861	0.9556	144.9	530.1	1.0000	0.3185	0.3185		135.354616	1	0.000e+00
TPV-DO_01172_VS_TPV-SL_01301	-1940.481123	2.6140	168.8	773.2	0.0747	0.2707	3.6235		-2013.843932	1.4970	178.6	763.4	1.0000	0.4990	0.4990		146.725618	1	0.000e+00
TPV-DO_01174_VS_TPV-SL_01302	-1157.832350	3.0182	116.3	459.7	0.0464	0.1952	4.2101		-1215.388611	1.1593	116.1	459.9	1.0000	0.3864	0.3864		115.112522	1	0.000e+00
TPV-DO_01175_VS_TPV-SL_01303	-1496.198563	1.1999	195.5	683.5	0.0264	0.0435	1.6465		-1630.819541	0.5716	194.8	684.2	1.0000	0.1905	0.1905		269.241956	1	0.000e+00
TPV-DO_01176_VS_TPV-SL_01304	-2532.420299	1.4288	259.3	1123.7	0.0500	0.1044	2.0881		-2693.528881	0.7450	265.3	1117.7	1.0000	0.2483	0.2483		322.217164	1	0.000e+00
TPV-DO_01177_VS_TPV-SL_01305	-2686.887730	1.7267	274.6	1183.4	0.0382	0.1001	2.6248		-2900.034745	0.8228	273.4	1184.6	1.0000	0.2743	0.2743		426.29403	1	0.000e+00
TPV-DO_01178_VS_TPV-SL_01306	-479.557474	2.2197	62.5	216.5	0.0160	0.0500	3.1321		-528.578763	0.6223	63.5	215.5	1.0000	0.2074	0.2074		98.042578	1	0.000e+00
TPV-DO_01180_VS_TPV-SL_01307	-2169.954401	23.8758	200.2	900.8	0.0044	0.1884	42.9180		-2268.614051	1.0497	210.4	890.6	1.0000	0.3499	0.3499		197.3193	1	0.000e+00
TPV-DO_01184_VS_TPV-SL_01308	-3071.456156	1.6088	282.7	1253.3	0.1248	0.2341	1.8754		-3161.794258	1.1811	296.0	1240.0	1.0000	0.3937	0.3937		180.676204	1	0.000e+00
TPV-DO_01185_VS_TPV-SL_01309	-809.716067	33.7293	100.1	337.9	0.0028	0.1375	48.7428		-870.080171	0.9470	98.1	339.9	1.0000	0.3157	0.3157		120.728208	1	0.000e+00
TPV-DO_01186_VS_TPV-SL_01310	-2019.458933	3.8933	208.4	904.6	0.0183	0.1176	6.4212		-2178.495109	0.8691	214.5	898.5	1.0000	0.2897	0.2897		318.072352	1	0.000e+00
TPV-DO_01187_VS_TPV-SL_01311	-743.350256	1.9466	68.8	294.2	0.1385	0.2978	2.1496		-761.383764	1.5725	81.7	281.3	1.0000	0.5242	0.5242		36.067016	1	1.906e-09
TPV-DO_01188_VS_TPV-SL_01312	-1225.129429	2.6437	135.6	452.4	0.0986	0.2835	2.8760		-1265.961509	1.5775	144.8	443.2	1.0000	0.5258	0.5258		81.66416	1	0.000e+00
TPV-DO_01190_VS_TPV-SL_01313	-2022.983819	1.1722	238.1	853.9	0.0644	0.0937	1.4560		-2144.871634	0.7300	245.5	846.5	1.0000	0.2433	0.2433		243.77563	1	0.000e+00
TPV-DO_01191_VS_TPV-SL_01314	-1306.692843	1.0738	172.1	643.9	0.0435	0.0635	1.4595		-1380.734480	0.5102	181.8	634.2	1.0000	0.1701	0.1701		148.083274	1	0.000e+00
TPV-DO_01192_VS_TPV-SL_01315	-2076.101643	1.9437	232.5	850.5	0.0690	0.1663	2.4094		-2171.042679	0.9586	230.6	852.4	1.0000	0.3195	0.3195		189.882072	1	0.000e+00
TPV-DO_01193_VS_TPV-SL_01316	-3264.589835	1.4913	351.0	1446.0	0.0475	0.1012	2.1281		-3497.272001	0.7782	360.5	1436.5	1.0000	0.2594	0.2594		465.364332	1	0.000e+00
TPV-DO_01194_VS_TPV-SL_01317	-757.480438	1.3674	68.4	339.6	0.0619	0.1287	2.0792		-790.931338	0.7416	72.8	335.2	1.0000	0.2472	0.2472		66.9018	1	3.331e-16
TPV-DO_01195_VS_TPV-SL_01319	-815.383233	5.9284	83.1	372.9	0.0085	0.0885	10.4451		-878.082518	0.7024	83.3	372.7	1.0000	0.2341	0.2341		125.39857	1	0.000e+00
TPV-DO_01196_VS_TPV-SL_01321	-1841.519751	2.0091	165.1	800.9	0.0394	0.1297	3.2895		-1972.980926	0.9053	169.1	796.9	1.0000	0.3018	0.3018		262.92235	1	0.000e+00
TPV-DO_01197_VS_TPV-SL_01322	-1340.293621	50.0000	136.1	517.9	0.0035	0.2801	79.0307		-1389.093348	1.6630	144.2	509.8	1.0000	0.5543	0.5543		97.599454	1	0.000e+00
TPV-DO_01198_VS_TPV-SL_01323	-1302.008272	2.5614	139.2	571.8	0.0340	0.1303	3.8264		-1394.363796	0.9045	140.6	570.4	1.0000	0.3015	0.3015		184.711048	1	0.000e+00
TPV-DO_01199_VS_TPV-SL_01324	-811.250343	6.1259	74.8	363.2	0.0123	0.1387	11.2780		-857.691791	0.8405	73.2	364.8	1.0000	0.2802	0.2802		92.882896	1	0.000e+00
TPV-DO_01200_VS_TPV-SL_01325	-1053.782808	1.2608	115.7	466.3	0.0361	0.0667	1.8446		-1138.615577	0.6586	119.2	462.8	1.0000	0.2195	0.2195		169.665538	1	0.000e+00
TPV-DO_01201_VS_TPV-SL_01326	-1139.486106	2.0063	132.9	428.1	0.0947	0.2049	2.1634		-1180.347466	1.0951	139.5	421.5	1.0000	0.3650	0.3650		81.72272	1	0.000e+00
TPV-DO_01202_VS_TPV-SL_01327	-529.746338	0.8965	49.0	233.0	0.0957	0.1131	1.1818		-552.728449	0.7061	51.8	230.2	1.0000	0.2354	0.2354		45.964222	1	1.204e-11
TPV-DO_01203_VS_TPV-SL_01328	-923.606592	10.3829	107.5	396.5	0.0103	0.1613	15.6265		-972.199261	1.0004	109.7	394.3	1.0000	0.3335	0.3335		97.185338	1	0.000e+00
TPV-DO_01204_VS_TPV-SL_01329	-1617.932578	1.4612	161.3	717.7	0.0382	0.0866	2.2684		-1747.533919	0.7413	159.7	719.3	1.0000	0.2471	0.2471		259.202682	1	0.000e+00
TPV-DO_01205_VS_TPV-SL_01330	-353.872915	0.8026	29.7	177.3	0.0712	0.0932	1.3088		-367.958005	0.5225	31.8	175.2	1.0000	0.1742	0.1742		28.17018	1	1.111e-07
TPV-DO_01206_VS_TPV-SL_01331	-1093.598658	3.9317	118.8	496.2	0.0147	0.0937	6.3908		-1184.455369	0.8014	119.5	495.5	1.0000	0.2671	0.2671		181.713422	1	0.000e+00
TPV-DO_01207_VS_TPV-SL_01333	-1156.092747	2.1975	81.3	440.7	0.1518	0.3917	2.5808		-1176.783075	1.6822	84.8	437.2	1.0000	0.5607	0.5607		41.380656	1	1.253e-10
TPV-DO_01208_VS_TPV-SL_01334	-574.245666	4.8954	63.0	270.0	0.0041	0.0350	8.4806		-650.162580	0.5918	62.3	270.7	1.0000	0.1973	0.1973		151.833828	1	0.000e+00
TPV-DO_01209_VS_TPV-SL_01335	-1570.202848	1.2276	133.5	664.5	0.1127	0.1766	1.5668		-1619.568792	0.9132	145.7	652.3	1.0000	0.3044	0.3044		98.731888	1	0.000e+00
TPV-DO_01210_VS_TPV-SL_01336	-496.848709	0.7587	69.1	236.9	0.0421	0.0412	0.9780		-528.132448	0.4774	69.3	236.7	1.0000	0.1591	0.1591		62.567478	1	2.554e-15
TPV-DO_01211_VS_TPV-SL_01337	-3636.874360	1.5555	388.6	1621.4	0.0355	0.0830	2.3354		-3901.425000	0.7000	415.3	1594.7	1.0000	0.2333	0.2333		529.10128	1	0.000e+00
TPV-DO_01212_VS_TPV-SL_01338	-828.015702	1.7861	75.0	381.0	0.0327	0.1014	3.1032		-889.775907	0.7529	75.1	380.9	1.0000	0.2510	0.2510		123.52041	1	0.000e+00
TPV-DO_01213_VS_TPV-SL_01339	-2917.646174	1.3373	330.4	1295.6	0.0334	0.0648	1.9396		-3168.329866	0.6844	359.3	1266.7	1.0000	0.2281	0.2281		501.367384	1	0.000e+00
TPV-DO_01214_VS_TPV-SL_01340	-922.003645	0.8503	104.2	426.8	0.0613	0.0707	1.1546		-976.844390	0.5479	104.5	426.5	1.0000	0.1826	0.1826		109.68149	1	0.000e+00
TPV-DO_01215_VS_TPV-SL_01341	-1459.022529	1.1326	120.0	633.0	0.1226	0.1763	1.4386		-1507.726009	0.8830	121.7	631.3	1.0000	0.2943	0.2943		97.40696	1	0.000e+00
TPV-DO_01216_VS_TPV-SL_01342	-1031.333213	2.6051	122.1	489.9	0.0130	0.0540	4.1373		-1139.459863	0.6241	122.5	489.5	1.0000	0.2080	0.2080		216.2533	1	0.000e+00
TPV-DO_01217_VS_TPV-SL_01343	-414.850241	2.3600	37.4	169.6	0.0438	0.1590	3.6326		-441.264337	1.0212	40.8	166.2	1.0000	0.3404	0.3404		52.828192	1	3.640e-13
TPV-DO_01218_VS_TPV-SL_01344	-2285.265644	1.8722	245.1	1122.9	0.0246	0.0771	3.1301		-2439.262847	0.5921	240.0	1128.0	1.0000	0.1974	0.1974		307.994406	1	0.000e+00
TPV-DO_01219_VS_TPV-SL_01345	-2066.281692	1.4336	228.3	974.7	0.0298	0.0665	2.2339		-2236.163008	0.6374	246.2	956.8	1.0000	0.2125	0.2125		339.762632	1	0.000e+00
TPV-DO_01220_VS_TPV-SL_01346	-1214.176742	50.0000	97.7	517.3	0.0019	0.2024	103.7936		-1263.378514	1.1591	111.5	503.5	1.0000	0.3864	0.3864		98.403544	1	0.000e+00
TPV-DO_01221_VS_TPV-SL_01347	-4521.301557	1.0115	537.9	2177.1	0.0348	0.0519	1.4917		-4837.707534	0.5077	554.9	2160.1	1.0000	0.1692	0.1692		632.811954	1	0.000e+00
TPV-DO_01222_VS_TPV-SL_01348	-3301.137337	1.0619	337.5	1465.5	0.0670	0.0982	1.4649		-3489.130473	0.7039	338.2	1464.8	1.0000	0.2346	0.2346		375.986272	1	0.000e+00
TPV-DO_01223_VS_TPV-SL_01349	-612.931118	4.0738	102.0	276.0	0.0070	0.0348	4.9382		-654.697138	0.4168	92.5	285.5	1.0000	0.1389	0.1389		83.53204	1	0.000e+00
TPV-DO_01224_VS_TPV-SL_01350	-491.982209	1.4908	51.4	179.6	0.1587	0.2280	1.4368		-504.193747	1.1199	54.0	177.0	1.0000	0.3733	0.3733		24.423076	1	7.734e-07
TPV-DO_01225_VS_TPV-SL_01351	-1164.965085	1.3180	118.9	508.1	0.0572	0.1065	1.8617		-1244.597289	0.7764	119.1	507.9	1.0000	0.2588	0.2588		159.264408	1	0.000e+00
TPV-DO_01226_VS_TPV-SL_01352	-569.100767	1.0523	68.6	255.4	0.1166	0.1347	1.1552		-586.375685	0.7643	69.2	254.8	1.0000	0.2548	0.2548		34.549836	1	4.155e-09
TPV-DO_01227_VS_TPV-SL_01353	-2979.845272	1.7551	356.1	1302.9	0.0474	0.1102	2.3223		-3149.390986	0.7999	378.1	1280.9	1.0000	0.2666	0.2666		339.091428	1	0.000e+00
TPV-DO_01229_VS_TPV-SL_01355	-2138.730009	1.2341	232.9	1024.1	0.0317	0.0618	1.9482		-2307.745676	0.5795	241.9	1015.1	1.0000	0.1932	0.1932		338.031334	1	0.000e+00
TPV-DO_01230_VS_TPV-SL_01356	-2401.693910	2.2469	238.5	1048.5	0.0399	0.1373	3.4386		-2535.819903	0.8861	254.9	1032.1	1.0000	0.2954	0.2954		268.251986	1	0.000e+00
TPV-DO_01231_VS_TPV-SL_01357	-2256.074089	1.3485	245.5	1026.5	0.0486	0.0940	1.9362		-2396.022493	0.7046	257.0	1015.0	1.0000	0.2349	0.2349		279.896808	1	0.000e+00
TPV-DO_01232_VS_TPV-SL_01358	-1112.717932	0.6352	126.3	521.7	0.1279	0.0909	0.7108		-1144.401304	0.5027	126.9	521.1	1.0000	0.1676	0.1676		63.366744	1	1.665e-15
TPV-DO_01233_VS_TPV-SL_01360	-376.280653	50.0000	44.9	153.1	0.0015	0.1106	73.0570		-408.992394	0.9642	44.5	153.5	1.0000	0.3214	0.3214		65.423482	1	5.551e-16
TPV-DO_01234_VS_TPV-SL_01361	-5372.472164	2.1695	572.4	2271.6	0.0400	0.1239	3.1012		-5724.806033	0.8724	587.0	2257.0	1.0000	0.2908	0.2908		704.667738	1	0.000e+00
TPV-DO_01235_VS_TPV-SL_01362	-815.460283	7.5966	117.0	324.0	0.0216	0.1943	9.0067		-857.409605	1.2800	114.6	326.4	1.0000	0.4267	0.4267		83.898644	1	0.000e+00
TPV-DO_01236_VS_TPV-SL_01363	-3002.610168	1.9547	293.3	1281.7	0.0656	0.1785	2.7189		-3130.484276	1.0057	301.5	1273.5	1.0000	0.3352	0.3352		255.748216	1	0.000e+00
TPV-DO_01237_VS_TPV-SL_01364	-1552.775928	1.1648	182.3	696.7	0.0356	0.0587	1.6477		-1672.394347	0.5731	187.8	691.2	1.0000	0.1910	0.1910		239.236838	1	0.000e+00
TPV-DO_01238_VS_TPV-SL_01365	-664.635909	1.7172	70.8	274.2	0.0724	0.1578	2.1783		-691.222802	0.9172	72.8	272.2	1.0000	0.3057	0.3057		53.173786	1	3.053e-13
TPV-DO_01239_VS_TPV-SL_01366	-977.389043	1.0365	121.1	478.9	0.0146	0.0236	1.6177		-1081.349691	0.4729	123.8	476.2	1.0000	0.1576	0.1576		207.921296	1	0.000e+00
TPV-DO_01240_VS_TPV-SL_01367	-687.033774	1.0511	61.1	304.9	0.0863	0.1266	1.4669		-714.002549	0.7323	66.1	299.9	1.0000	0.2441	0.2441		53.93755	1	2.069e-13
TPV-DO_01241_VS_TPV-SL_01368	-773.122541	1.3418	99.2	353.8	0.0407	0.0726	1.7833		-831.664911	0.6582	103.7	349.3	1.0000	0.2194	0.2194		117.08474	1	0.000e+00
TPV-DO_01243_VS_TPV-SL_01369	-2252.048312	6.6458	223.6	844.4	0.0489	0.4367	8.9314		-2314.579872	2.4459	234.0	834.0	1.0000	0.8153	0.8153		125.06312	1	0.000e+00
TPV-DO_01245_VS_TPV-SL_01370	-2657.011090	1.3125	271.0	1238.0	0.0355	0.0744	2.0964		-2861.377465	0.6277	282.2	1226.8	1.0000	0.2092	0.2092		408.73275	1	0.000e+00
TPV-DO_01246_VS_TPV-SL_01371	-1207.207333	1.8207	123.8	542.2	0.0329	0.0938	2.8532		-1302.329228	0.7518	123.8	542.2	1.0000	0.2506	0.2506		190.24379	1	0.000e+00
TPV-DO_01247_VS_TPV-SL_01372	-1115.272368	5.9938	113.9	447.1	0.0306	0.2689	8.7873		-1162.052118	1.5115	123.9	437.1	1.0000	0.5038	0.5038		93.5595	1	0.000e+00
TPV-DO_01248_VS_TPV-SL_01373	-1483.046910	2.0745	184.8	694.2	0.0188	0.0578	3.0718		-1620.197760	0.6358	185.7	693.3	1.0000	0.2119	0.2119		274.3017	1	0.000e+00
TPV-DO_01249_VS_TPV-SL_01374	-1009.601602	4.3428	101.8	357.2	0.0630	0.3370	5.3450		-1038.619951	1.5522	105.9	353.1	1.0000	0.5174	0.5174		58.036698	1	2.576e-14
TPV-DO_01250_VS_TPV-SL_01375	-1863.375379	2.0849	149.9	861.1	0.0280	0.1132	4.0373		-2001.495792	0.7736	162.3	848.7	1.0000	0.2579	0.2579		276.240826	1	0.000e+00
TPV-DO_01251_VS_TPV-SL_01376	-1282.943100	1.1118	144.3	581.7	0.0577	0.0873	1.5123		-1356.740385	0.6468	145.1	580.9	1.0000	0.2156	0.2156		147.59457	1	0.000e+00
TPV-DO_01252_VS_TPV-SL_01377	-2251.547002	1.1798	232.9	1000.1	0.0591	0.0981	1.6607		-2387.609581	0.7090	245.7	987.3	1.0000	0.2363	0.2363		272.125158	1	0.000e+00
TPV-DO_01253_VS_TPV-SL_01378	-2692.774885	1.2498	312.7	1253.3	0.0383	0.0692	1.8086		-2881.529031	0.6022	322.6	1243.4	1.0000	0.2007	0.2007		377.508292	1	0.000e+00
TPV-DO_01254_VS_TPV-SL_01379	-5109.334547	1.1672	584.0	2389.0	0.0495	0.0815	1.6473		-5401.382442	0.6047	596.7	2376.3	1.0000	0.2016	0.2016		584.09579	1	0.000e+00
TPV-DO_01255_VS_TPV-SL_01380	-865.027025	1.4045	69.3	383.7	0.1989	0.2897	1.4564		-877.538921	1.1855	72.9	380.1	1.0000	0.3952	0.3952		25.023792	1	5.663e-07
TPV-DO_01256_VS_TPV-SL_01381	-1023.396155	1.4938	127.6	475.4	0.0277	0.0591	2.1335		-1112.562640	0.6793	130.8	472.2	1.0000	0.2264	0.2264		178.33297	1	0.000e+00
TPV-DO_01257_VS_TPV-SL_01382	-622.868538	1.6972	75.9	284.1	0.0240	0.0592	2.4614		-682.435283	0.5995	74.2	285.8	1.0000	0.1998	0.1998		119.13349	1	0.000e+00
TPV-DO_01258_VS_TPV-SL_01383	-4240.911723	2.4747	352.8	1732.2	0.0500	0.1959	3.9135		-4440.013026	1.0641	361.8	1723.2	1.0000	0.3547	0.3547		398.202606	1	0.000e+00
TPV-DO_01259_VS_TPV-SL_01384	-728.899479	0.7396	104.2	267.8	3.4764	0.3080	0.0886		-734.183054	0.7137	103.6	268.4	1.0000	0.2379	0.2379		10.56715	1	1.151e-03
TPV-DO_01260_VS_TPV-SL_01385	-1388.824839	1.1268	154.3	592.7	0.0776	0.1087	1.4007		-1450.626678	0.6986	156.2	590.8	1.0000	0.2329	0.2329		123.603678	1	0.000e+00
TPV-DO_01261_VS_TPV-SL_01386	-2080.704058	1.5132	173.3	828.7	0.0995	0.1966	1.9762		-2157.658821	1.0590	187.3	814.7	1.0000	0.3530	0.3530		153.909526	1	0.000e+00
TPV-DO_01262_VS_TPV-SL_01387	-1022.557598	0.8435	115.1	502.9	0.0421	0.0537	1.2750		-1088.731054	0.5000	125.6	492.4	1.0000	0.1667	0.1667		132.346912	1	0.000e+00
TPV-DO_01263_VS_TPV-SL_01388	-2973.603021	0.9863	341.7	1392.3	0.0426	0.0605	1.4220		-3176.972463	0.5487	358.0	1376.0	1.0000	0.1829	0.1829		406.738884	1	0.000e+00
TPV-DO_01264_VS_TPV-SL_01389	-1080.643452	1.1927	120.6	500.4	0.0393	0.0692	1.7600		-1156.008815	0.5761	121.0	500.0	1.0000	0.1920	0.1920		150.730726	1	0.000e+00
TPV-DO_01265_VS_TPV-SL_01390	-1093.595367	2.3868	122.1	402.9	0.0702	0.1950	2.7778		-1144.299061	1.1294	123.8	401.2	1.0000	0.3765	0.3765		101.407388	1	0.000e+00
TPV-DO_01266_VS_TPV-SL_01391	-824.948064	0.7058	118.1	400.9	0.0248	0.0236	0.9534		-893.334162	0.4397	119.4	399.6	1.0000	0.1466	0.1466		136.772196	1	0.000e+00
TPV-DO_01267_VS_TPV-SL_01392	-4519.648174	1.4109	476.4	2046.6	0.0441	0.0923	2.0939		-4820.835748	0.6867	493.2	2029.8	1.0000	0.2289	0.2289		602.375148	1	0.000e+00
TPV-DO_01268_VS_TPV-SL_01393	-514.775269	17.4570	75.0	228.0	0.0028	0.0653	23.2994		-554.852705	0.6213	72.0	231.0	1.0000	0.2071	0.2071		80.154872	1	0.000e+00
TPV-DO_01269_VS_TPV-SL_01394	-1001.435045	1.4510	108.2	458.8	0.0407	0.0880	2.1613		-1065.496309	0.6338	107.8	459.2	1.0000	0.2113	0.2113		128.122528	1	0.000e+00
TPV-DO_01270_VS_TPV-SL_01396	-1287.336247	29.8054	117.0	510.0	0.0068	0.3535	51.7044		-1333.620780	1.7653	124.9	502.1	1.0000	0.5884	0.5884		92.569066	1	0.000e+00
TPV-DO_01272_VS_TPV-SL_01397	-675.036863	1.0372	63.0	321.0	0.0356	0.0635	1.7841		-728.285279	0.5944	71.5	312.5	1.0000	0.1981	0.1981		106.496832	1	0.000e+00
TPV-DO_01273_VS_TPV-SL_01398	-2449.926395	1.0916	251.6	1053.4	0.0765	0.1093	1.4296		-2569.728801	0.7249	260.2	1044.8	1.0000	0.2416	0.2416		239.604812	1	0.000e+00
TPV-DO_01274_VS_TPV-SL_01399	-535.713858	1.1504	76.3	241.7	0.0641	0.0852	1.3292		-561.405290	0.6370	77.8	240.2	1.0000	0.2123	0.2123		51.382864	1	7.599e-13
TPV-DO_01275_VS_TPV-SL_01400	-650.542242	2.4753	56.5	255.5	0.0785	0.2638	3.3608		-671.311786	1.2557	59.5	252.5	1.0000	0.4186	0.4186		41.539088	1	1.155e-10
TPV-DO_01276_VS_TPV-SL_01401	-954.861783	1.1831	90.7	452.3	0.0389	0.0769	1.9772		-1025.518164	0.6255	92.3	450.7	1.0000	0.2085	0.2085		141.312762	1	0.000e+00
TPV-DO_01277_VS_TPV-SL_01402	-10343.459703	1.1143	1094.2	4533.8	0.0757	0.1101	1.4542		-10841.535377	0.7141	1150.9	4477.1	1.0000	0.2380	0.2380		996.151348	1	0.000e+00
TPV-DO_01278_VS_TPV-SL_01403	-1396.422831	1.5423	137.0	625.0	0.0588	0.1325	2.2550		-1482.959302	0.9259	144.1	617.9	1.0000	0.3086	0.3086		173.072942	1	0.000e+00
TPV-DO_01279_VS_TPV-SL_01404	-1382.610255	1.5293	139.0	653.0	0.0295	0.0753	2.5513		-1499.301856	0.6682	148.6	643.4	1.0000	0.2227	0.2227		233.383202	1	0.000e+00
TPV-DO_01280_VS_TPV-SL_01405	-1344.906997	2.4371	155.2	573.8	0.0290	0.0998	3.4467		-1433.537346	0.7758	164.4	564.6	1.0000	0.2586	0.2586		177.260698	1	0.000e+00
TPV-DO_01281_VS_TPV-SL_01406	-1804.874148	1.5647	179.9	879.1	0.0191	0.0536	2.8090		-1986.924793	0.5803	179.4	879.6	1.0000	0.1934	0.1934		364.10129	1	0.000e+00
TPV-DO_01282_VS_TPV-SL_01407	-2125.168711	1.2781	202.3	934.7	0.0750	0.1334	1.7787		-2234.951551	0.8300	206.1	930.9	1.0000	0.2767	0.2767		219.56568	1	0.000e+00
TPV-DO_01283_VS_TPV-SL_01408	-4208.708366	1.1175	484.3	1999.7	0.0363	0.0604	1.6615		-4509.791127	0.5272	495.1	1988.9	1.0000	0.1757	0.1757		602.165522	1	0.000e+00
TPV-DO_01284_VS_TPV-SL_01409	-792.828728	1.8840	91.2	355.8	0.0533	0.1358	2.5478		-822.106968	0.7320	91.4	355.6	1.0000	0.2440	0.2440		58.55648	1	1.976e-14
TPV-DO_01285_VS_TPV-SL_01410	-438.756105	0.8316	45.2	212.8	0.0514	0.0654	1.2734		-464.416756	0.5027	46.3	211.7	1.0000	0.1676	0.1676		51.321302	1	7.842e-13
TPV-DO_01286_VS_TPV-SL_01411	-2230.785251	1.3292	243.7	1022.3	0.0534	0.1004	1.8801		-2355.720216	0.6848	252.1	1013.9	1.0000	0.2283	0.2283		249.86993	1	0.000e+00
TPV-DO_01287_VS_TPV-SL_01412	-1089.518339	0.9560	113.8	525.2	0.0522	0.0752	1.4424		-1153.892520	0.5779	119.7	519.3	1.0000	0.1926	0.1926		128.748362	1	0.000e+00
TPV-DO_01288_VS_TPV-SL_01413	-1008.030865	3.5719	107.2	456.8	0.0182	0.1057	5.8160		-1081.902845	0.7621	111.7	452.3	1.0000	0.2540	0.2540		147.74396	1	0.000e+00
TPV-DO_01289_VS_TPV-SL_01414	-1696.226257	1.6900	176.4	687.6	0.0783	0.1656	2.1141		-1773.332236	0.9733	183.6	680.4	1.0000	0.3244	0.3244		154.211958	1	0.000e+00
TPV-DO_01290_VS_TPV-SL_01415	-2076.385939	1.8334	240.3	884.7	0.0315	0.0807	2.5638		-2232.322531	0.7147	251.0	874.0	1.0000	0.2382	0.2382		311.873184	1	0.000e+00
TPV-DO_01291_VS_TPV-SL_01416	-2953.912009	0.9015	332.5	1386.5	0.0454	0.0594	1.3062		-3151.539233	0.5482	352.4	1366.6	1.0000	0.1827	0.1827		395.254448	1	0.000e+00
TPV-DO_01292_VS_TPV-SL_01417	-4758.754714	1.0764	545.1	2226.9	0.0292	0.0476	1.6305		-5168.145083	0.5472	553.6	2218.4	1.0000	0.1824	0.1824		818.780738	1	0.000e+00
TPV-DO_01293_VS_TPV-SL_01418	-2913.213089	1.8335	329.8	1269.2	0.0449	0.1136	2.5263		-3077.809089	0.7864	338.9	1260.1	1.0000	0.2621	0.2621		329.192	1	0.000e+00
TPV-DO_01294_VS_TPV-SL_01419	-939.191599	0.8975	106.2	427.8	0.0336	0.0445	1.3249		-1013.797388	0.5462	112.1	421.9	1.0000	0.1821	0.1821		149.211578	1	0.000e+00
TPV-DO_01295_VS_TPV-SL_01420	-2504.277010	4.8562	222.0	984.0	0.0406	0.3023	7.4522		-2599.091130	1.5161	227.2	978.8	1.0000	0.5054	0.5054		189.62824	1	0.000e+00
TPV-DO_01296_VS_TPV-SL_01421	-1975.237685	1.6533	196.5	871.5	0.0310	0.0816	2.6333		-2138.524046	0.7505	219.8	848.2	1.0000	0.2502	0.2502		326.572722	1	0.000e+00
TPV-DO_01297_VS_TPV-SL_01422	-1408.646502	1.9153	147.1	632.9	0.0356	0.1044	2.9363		-1519.546446	0.8553	153.2	626.8	1.0000	0.2851	0.2851		221.799888	1	0.000e+00
TPV-DO_01298_VS_TPV-SL_01423	-938.893977	1.3465	99.9	443.1	0.0376	0.0786	2.0901		-1004.049623	0.6366	99.6	443.4	1.0000	0.2122	0.2122		130.311292	1	0.000e+00
TPV-DO_01299_VS_TPV-SL_01424	-1128.190089	0.5489	152.5	558.5	0.0179	0.0143	0.8005		-1215.987995	0.3645	189.5	521.5	1.0000	0.1215	0.1215		175.595812	1	0.000e+00
TPV-DO_01300_VS_TPV-SL_01426	-1202.094622	1.1290	125.3	522.7	0.0747	0.1109	1.4840		-1265.384917	0.7296	127.3	520.7	1.0000	0.2432	0.2432		126.58059	1	0.000e+00
TPV-DO_01301_VS_TPV-SL_01427	-1935.663523	50.0000	130.0	728.0	0.0051	0.5417	106.9498		-1984.021316	2.6298	142.1	715.9	1.0000	0.8766	0.8766		96.715586	1	0.000e+00
TPV-DO_01302_VS_TPV-SL_01428	-148.114277	0.4960	19.0	74.0	0.0389	0.0273	0.7032		-157.019229	0.3259	19.0	74.0	1.0000	0.1086	0.1086		17.809904	1	2.441e-05
TPV-DO_01303_VS_TPV-SL_01429	-1211.187833	2.3691	120.4	575.6	0.0175	0.0736	4.2125		-1324.510593	0.6848	128.1	567.9	1.0000	0.2283	0.2283		226.64552	1	0.000e+00
TPV-DO_01304_VS_TPV-SL_01431	-1255.218501	1.9701	112.4	580.6	0.0328	0.1134	3.4625		-1341.021233	0.7643	117.4	575.6	1.0000	0.2548	0.2548		171.605464	1	0.000e+00
TPV-DO_01305_VS_TPV-SL_01432	-720.653717	50.0000	55.2	301.8	0.0026	0.2789	106.1956		-749.377016	1.3496	54.4	302.6	1.0000	0.4499	0.4499		57.446598	1	3.475e-14
TPV-DO_01306_VS_TPV-SL_01433	-1015.729908	1.4944	93.9	440.1	0.0667	0.1440	2.1580		-1069.901068	0.9122	102.2	431.8	1.0000	0.3041	0.3041		108.34232	1	0.000e+00
TPV-DO_01307_VS_TPV-SL_01434	-4197.849786	1.3650	458.9	1983.1	0.0153	0.0347	2.2716		-4679.971418	0.5687	462.4	1979.6	1.0000	0.1896	0.1896		964.243264	1	0.000e+00
TPV-DO_01308_VS_TPV-SL_01435	-771.875390	4.8784	73.6	316.4	0.0299	0.2281	7.6376		-803.714275	1.4446	80.0	310.0	1.0000	0.4815	0.4815		63.67777	1	1.443e-15
TPV-DO_01310_VS_TPV-SL_01437	-3228.542060	1.2202	403.0	1289.0	0.0565	0.0817	1.4463		-3450.690610	0.7417	432.7	1259.3	1.0000	0.2472	0.2472		444.2971	1	0.000e+00
TPV-DO_01311_VS_TPV-SL_01081	-979.435258	0.7026	127.2	511.8	0.0088	0.0100	1.1363		-1070.193046	0.3343	136.9	502.1	1.0000	0.1114	0.1114		181.515576	1	0.000e+00
TPV-DO_01312_VS_TPV-SL_01080	-2415.968605	1.3777	255.2	1181.8	0.0235	0.0548	2.3322		-2632.807544	0.5697	275.4	1161.6	1.0000	0.1899	0.1899		433.677878	1	0.000e+00
TPV-DO_01313_VS_TPV-SL_01079	-3232.297411	1.6594	344.0	1483.0	0.0345	0.0883	2.5575		-3460.346760	0.6983	363.0	1464.0	1.0000	0.2328	0.2328		456.098698	1	0.000e+00
TPV-DO_01314_VS_TPV-SL_01078	-681.707557	1.8334	84.1	248.9	0.1262	0.2223	1.7616		-698.395476	1.1172	87.3	245.7	1.0000	0.3724	0.3724		33.375838	1	7.596e-09
TPV-DO_01316_VS_TPV-SL_01073	-1355.322011	1.1868	131.7	585.3	0.0862	0.1342	1.5575		-1423.539297	0.8401	135.9	581.1	1.0000	0.2800	0.2800		136.434572	1	0.000e+00
TPV-DO_01317_VS_TPV-SL_01072	-530.921658	1.7741	60.7	239.3	0.0296	0.0775	2.6157		-565.354247	0.6380	63.9	236.1	1.0000	0.2127	0.2127		68.865178	1	1.110e-16
TPV-DO_01318_VS_TPV-SL_01070	-787.151559	0.8483	99.9	350.1	0.0830	0.0819	0.9868		-821.517572	0.5840	108.0	342.0	1.0000	0.1947	0.1947		68.732026	1	1.110e-16
TPV-DO_01319_VS_TPV-SL_01069	-547.909856	2.2478	71.4	288.6	0.0072	0.0264	3.6713		-605.846487	0.4481	66.8	293.2	1.0000	0.1494	0.1494		115.873262	1	0.000e+00
TPV-DO_01320_VS_TPV-SL_01068	-987.514498	1.9254	101.9	486.1	0.0196	0.0663	3.3879		-1066.554097	0.5692	104.5	483.5	1.0000	0.1897	0.1897		158.079198	1	0.000e+00
TPV-DO_01321_VS_TPV-SL_01067	-698.001815	1.4305	72.0	342.0	0.0673	0.1399	2.0776		-719.419876	0.6763	72.8	341.2	1.0000	0.2254	0.2254		42.836122	1	5.952e-11
TPV-DO_01322_VS_TPV-SL_01066	-1682.791189	1.1132	191.5	771.5	0.0744	0.1068	1.4360		-1762.071366	0.7168	215.3	747.7	1.0000	0.2389	0.2389		158.560354	1	0.000e+00
TPV-DO_01323_VS_TPV-SL_01065	-2357.689087	1.4081	244.3	1066.7	0.0553	0.1121	2.0290		-2486.366785	0.7468	261.5	1049.5	1.0000	0.2489	0.2489		257.355396	1	0.000e+00
TPV-DO_01324_VS_TPV-SL_01064	-1123.496466	1.5043	113.3	531.7	0.0321	0.0797	2.4815		-1201.930697	0.6469	119.8	525.2	1.0000	0.2156	0.2156		156.868462	1	0.000e+00
TPV-DO_01325_VS_TPV-SL_01063	-1947.822228	1.5961	221.9	918.1	0.0254	0.0629	2.4729		-2110.295337	0.6072	228.9	911.1	1.0000	0.2024	0.2024		324.946218	1	0.000e+00
TPV-DO_01326_VS_TPV-SL_01062	-2407.346896	1.7559	233.9	1092.1	0.0604	0.1563	2.5882		-2514.825022	0.8759	244.1	1081.9	1.0000	0.2920	0.2920		214.956252	1	0.000e+00
TPV-DO_01327_VS_TPV-SL_01061	-452.314432	0.7991	47.0	202.0	0.1195	0.1115	0.9327		-467.761280	0.6065	47.3	201.7	1.0000	0.2022	0.2022		30.893696	1	2.726e-08
TPV-DO_01328_VS_TPV-SL_01060	-2569.146592	0.9835	284.1	1296.9	0.0201	0.0336	1.6712		-2805.578407	0.4825	336.5	1244.5	1.0000	0.1608	0.1608		472.86363	1	0.000e+00
TPV-DO_01329_VS_TPV-SL_01059	-8322.001859	2.2733	761.7	3813.3	0.0305	0.1205	3.9481		-8883.028548	0.8290	806.9	3768.1	1.0000	0.2763	0.2763		1122.053378	1	0.000e+00
TPV-DO_01330_VS_TPV-SL_01057	-4548.127969	0.7195	505.6	2377.4	0.0142	0.0182	1.2821		-4964.811824	0.3778	567.0	2316.0	1.0000	0.1259	0.1259		833.36771	1	0.000e+00
TPV-DO_01331_VS_TPV-SL_01056	-1691.077777	3.5056	146.6	666.4	0.0459	0.2460	5.3627		-1755.749922	1.2908	160.6	652.4	1.0000	0.4303	0.4303		129.34429	1	0.000e+00
TPV-DO_01332_VS_TPV-SL_01055	-941.986013	1.9824	110.3	468.7	0.0058	0.0196	3.3868		-1078.660015	0.5465	121.0	458.0	1.0000	0.1822	0.1822		273.348004	1	0.000e+00
TPV-DO_01333_VS_TPV-SL_01054	-3431.854429	1.6131	321.9	1508.1	0.0609	0.1448	2.3784		-3610.159202	0.8875	332.5	1497.5	1.0000	0.2958	0.2958		356.609546	1	0.000e+00
TPV-DO_01334_VS_TPV-SL_01053	-1666.895085	1.7502	184.5	829.5	0.0135	0.0408	3.0230		-1856.476464	0.5496	187.6	826.4	1.0000	0.1832	0.1832		379.162758	1	0.000e+00
TPV-DO_01335_VS_TPV-SL_01052	-1978.125269	2.1853	191.5	828.5	0.0466	0.1504	3.2298		-2086.955972	0.9433	201.7	818.3	1.0000	0.3144	0.3144		217.661406	1	0.000e+00
TPV-DO_01336_VS_TPV-SL_01051	-2262.377957	4.3315	251.1	921.9	0.0352	0.2100	5.9727		-2349.962189	1.2327	275.7	897.3	1.0000	0.4109	0.4109		175.168464	1	0.000e+00
TPV-DO_01337_VS_TPV-SL_01050	-1404.103983	1.4743	172.2	607.8	0.0519	0.0976	1.8812		-1484.641595	0.7403	187.0	593.0	1.0000	0.2468	0.2468		161.075224	1	0.000e+00
TPV-DO_01338_VS_TPV-SL_01049	-1302.569999	2.3013	117.7	527.3	0.1141	0.3174	2.7821		-1329.456199	1.4497	122.8	522.2	1.0000	0.4832	0.4832		53.7724	1	2.252e-13
Table S2. Calculation of dN/dS ratio of orthologous genes between the two Tupanvirus.
